# Supplementary material for: Sampling impacts the assessment of tooth growth and replacement rates in archosaurs: implications for paleontological studies
Source: PeerJ. 2020 Sep 18;8:e9918. doi: 10.7717/peerj.9918 (PMC7505082; doi:10.7717/peerj.9918)
Supplement: Supplemental Information 4 — Raw data of tooth length (TH) and central axis height (CAH; measured from the tip of the pulp cavity to the crown apex) is provided in supplementary file Data S1. It contains raw TH and CAH as well as TH and CAH corrected for average enamel thickness. Data S1 also contains the calculations used for all tables, graphs and statistic tests performed mentioned in this work, including the computation of average enamel thickness for all individuals. [file peerj-08-9918-s004.xlsm]

## Sheet: Tooth measurements raw data
						Reconstructed crowns, reduced by enamel height						Crowns as they are
Specimen	tooth	root depth	root depth to reference	apex depth	apex depth to reference	tooth length	volume	[all in mm]		crown length		tooth length	volume	[all in mm]		crown length		volume of reconstruced parts	root volume	crown volume	total volume	tooth length without enamel	crown length with enamel
Medium Alligator	1					5.7075	2.28173	functinal tooth		2.4475		5.79	2.28173	functinal tooth		2.53			1.21938	1.06234	2.28173	5.79	2.53	measured in two measurements
refenrence depth						1.2775	0.21732			0.6275		1.36	0.21732			0.71			0.12454	0.0927802	0.21732	1.36	0.71
n.a.	2					5.1275	3.0836	functional tooth	3.50+1.71	2.1575		5.21	3.0836	functional tooth	3.50+1.71	2.24			1.67625	1.40735	3.0836	5.21	2.24	not reliable numbers
Pmx						2.1875	0.687425			0.9175		2.27	0.687425			1			0.443808	0.243617	0.687425	2.27	1
	3					9.0275	12.2091	functinal tooth		2.9475		9.11	12.2091	functinal tooth		3.03			8.63661	3.5725	12.2091	9.11	3.03
						3.0175	1.603			1.0375		3.1	1.603			1.12			1.06234	0.540662	1.603	3.1	1.12
	4					11.4175	21.3727	functional tooth		2.5375		11.5	21.3727	functional tooth		2.62			18.6114	2.76128	21.3727	11.5	2.62
						2.2675	0.86493			0.9175		2.35	0.86493			1			0.536032	0.328897	0.86493	2.35	1
	5					7.8175	7.32232	functional tooth	6.39+1.51	2.6075		7.9	7.32204	functional tooth	6.39+1.51	2.69			4.60086	2.72146	7.32232	7.9	2.69
						2.8275	1.19799			1.3775		2.91	1.19799			1.46			0.697981	0.500013	1.19799	2.91	1.46
						0.3775	0.01463		0.39+0.07	0.1175		0.46	0.015093		0.39+0.07	0.2			0.010278	0.00435196	0.01463	0.46	0.2
Medium Alligator	1					8.0075	7.74964	functional tooth		2.6075		8.09	7.74965	functional tooth		2.69			5.76941	1.98024	7.74964	8.09	2.69
refenrence depth						2.0075	0.549644			0.6775		2.09	0.549644			0.76			0.277785	0.271859	0.549644	2.09	0.76
n.a.	2					7.2875	7.61631	functional tooth	6.04+1.33	3.5275		7.37	7.61631	functional tooth	6.04+1.33	3.61			2.48173	5.13458	7.61631	7.37	3.61
Mx						5.7975	5.33875			2.0075		5.88	5.33875			2.09			3.59083	1.74792	5.33875	5.88	2.09
						1.0075	0.159449		0.97+0.12	0.3275		1.09	0.159449		0.97+0.12	0.41			0.0983359	0.0611127	0.159449	1.09	0.41
	3					12.2975	30.1717	functional tooth		2.9475		12.38	30.1717	functional tooth		3.03			26.1155	4.05622	30.1717	12.38	3.03
						3.3075	2.04579			1.0375		3.39	2.04579			1.12			1.29309	0.752705	2.04579	3.39	1.12
	4					9.9875	18.7089	functional tooth		2.6375		10.07	18.7089	functional tooth		2.72			15.3172	3.39166	18.7089	10.07	2.72
						1.6375	0.468438		1.55+0.17	0.4875		1.72	0.468438		1.55+0.17	0.57			0.215746	0.252692	0.468438	1.72	0.57
	5					11.1875	22.7832	functional tooth		2.8175		11.27	22.7832	functional tooth		2.9			19.4456	3.33759	22.7832	11.27	2.9
						2.4175	0.960858		2.40+0.10	0.9275		2.5	0.96734		2.40+0.10	1.01			0.537421	0.423437	0.960858	2.5	1.01
	6					9.6375	16.4975	functional tooth	8.94+0.78	3.3175		9.72	16.4975	functional tooth	8.94+0.78	3.4			11.2851	5.21236	16.4975	9.72	3.4
						3.1275	2.14117			1.3575		3.21	2.14117			1.44			1.22392	0.917246	2.14117	3.21	1.44
						0.3075	0.0167597			0.0575		0.39	0.0167597			0.14			0.0110188	0.00574089	0.0167597	0.39	0.14
	7					8.2475	9.22033	functional tooth		2.3175		8.33	9.22033	functional tooth		2.4			6.70138	2.51895	9.22033	8.33	2.4
						1.2375	0.310378			0.5875		1.32	0.310378			0.67			0.157411	0.152967	0.310378	1.32	0.67
	8					9.0675	14.8353	functional tooth	8.55+0.60	2.7375		9.15	14.8317	functional tooth	8.55+0.60	2.82			10.745	4.09029	14.8353	9.15	2.82
						2.7675	1.7756			1.2875		2.85	1.77884			1.37			0.977062	0.798539	1.7756	2.85	1.37
	9					8.8675	12.0575	functional tooth		2.2975		8.95	12.0575	functional tooth		2.38			8.82245	3.23508	12.0575	8.95	2.38
						1.2775	0.318249		1.29+0.07	0.5575		1.36	0.318249		1.29+0.07	0.64			0.173801	0.144448	0.318249	1.36	0.64
	10					10.3075	26.017	functional tooth	9.57+0.82	3.2575		10.39	26.017	functional tooth	9.57+0.82	3.34			19.2424	6.77453	26.017	10.39	3.34
						2.8875	2.04579			1.2375		2.97	2.04579			1.32			1.11864	0.927154	2.04579	2.97	1.32
	11					6.9075	11.6512	functional tooth		2.2975		6.99	11.6512	functional tooth		2.38			7.60872	4.04251	11.6512	6.99	2.38
						0.7775	0.0840762		0.78+0.08	0.2475		0.86	0.0840762		0.78+0.08	0.33			0.0557422	0.0283341	0.0840762	0.86	0.33
	12					8.6975	20.721	functional tooth		3.0175		8.78	20.721	functional tooth		3.1			13.8176	6.90342	20.721	8.78	3.1
						1.6675	0.89206			0.8175		1.75	0.89206			0.9			0.4114	0.480661	0.89206	1.75	0.9
	13					7.4375	13.689	functional tooth	5.82+1.70	2.8175		7.52	13.689	functional tooth	5.82+1.70	2.9			7.5576	6.13136	13.689	7.52	2.9
						2.0675	1.52495			1.1075		2.15	1.52495			1.19			0.633813	0.891134	1.52495	2.15	1.19
	14					6.1675	7.96021	functional tooth		2.1975		6.25	7.96021	functional tooth		2.28			4.98133	2.97887	7.96021	6.25	2.28
						0.7775	0.147411			0.4175		0.86	0.147411			0.5			0.0660202	0.081391	0.147411	0.86	0.5
	15					5.7775	5.16152	functional tooth		3.0675		5.86	5.16152	functional tooth		3.15			2.05653	3.10499	5.16152	5.86	3.15
						1.6075	0.627979			0.4175		1.69	0.627979			0.5			0.187783	0.440197	0.627979	1.69	0.5
Medium Alligator	1					9.3875	14.4568	functional tooth		2.1175		9.47	14.4568	functional tooth		2.2			11.6663	2.79044	14.4568	9.47	2.2
refenrence depth						3.1675	1.49541			?		3.25	1.49541			?			1.04438	0.45103	1.49541	3.25	?
n.a.	2					8.1275	9.52145	functional tooth		2.3875		8.21	9.52145	functional tooth		2.47			7.36676	2.15469	9.52145	8.21	2.47
Dent						1.7175	0.364361			0.4275		1.8	0.364361			0.51			0.237043	0.127318	0.364361	1.8	0.51
	3					8.5175	7.5026	functional tooth	7.65+0.95	3.1575		8.6	7.5026	functional tooth	7.65+0.95	3.24			4.53873	2.96387	7.5026	8.6	3.24
						4.5175	2.38025			1.4775		4.6	2.38015			1.56			1.56643	0.813817	2.38025	4.6	1.56
						0.5175	0.0383343			0.1075		0.6	0.0383343			0.19			0.0172227	0.0211117	0.0383343	0.6	0.19
	4					11.1275	20.1347	functional tooth		2.6575		11.21	20.1347	functional tooth		2.74			17.5648	2.56988	20.1347	11.21	2.74
						2.2675	0.850948			0.7675		2.35	0.850948			0.85			0.555014	0.295934	0.850948	2.35	0.85
	5					7.5675	7.55649	functional tooth		2.1675		7.65	7.55344	functional tooth		2.25			5.41921	2.13728	7.55649	7.65	2.25
						2.0675	0.607608			0.9475		2.15	0.607608			1.03			0.355657	0.251951	0.607608	2.15	1.03
	6					6.7075	4.50141	functional tooth		1.9175		6.79	4.50447	functional tooth		2			3.42398	1.07744	4.50141	6.79	2
						0.8775	0.123337			0.3875		0.96	0.123337			0.47			0.0693536	0.0539829	0.123337	0.96	0.47
	7					5.2275	3.99927	functional tooth	3.02+2.29	1.7675		5.31	3.99927	functional tooth	3.02+2.29	1.85			2.7334	1.26587	3.99927	5.31	1.85
						2.2075	0.782983			1.0475		2.29	0.782983			1.13			0.427696	0.355287	0.782983	2.29	1.13
	8					6.0175	4.41039	functional tooth	5.92+0.18	2.2775		6.1	4.41039	functional tooth	5.92+0.18	2.36			2.8498	1.5606	4.41039	6.1	2.36
						1.1475	0.238247			0.5975		1.23	0.238247			0.68			0.143059	0.0951876	0.238247	1.23	0.68
	9					4.4975	2.81415	functional tooth		0.9575		4.58	2.81415	functional tooth		1.04			1.87375	0.940395	2.81415	4.58	1.04
						0.2875	0.0177782			0.1675		0.37	0.0177782			0.25			0.010278	0.00750019	0.0177782	0.37	0.25
	10					5.8175	4.55901	functional tooth	3.86+2.04	2.3075		5.9	4.55901	functional tooth	3.86+2.04	2.39			2.71229	1.84671	4.55901	5.9	2.39
						1.3975	0.348435			0.6675		1.48	0.348435			0.75			0.196301	0.152134	0.348435	1.48	0.75
	11					5.5675	4.16502	functional tooth		1.6675		5.65	4.16502	functional tooth		1.75			2.82655	1.33846	4.16502	5.65	1.75
						0.7575	0.0602793		0.63+0.21	0.3275		0.84	0.0602793		0.63+0.21	0.41			0.0262044	0.034075	0.0602793	0.84	0.41
	12					8.5575	13.8068	functional tooth	5.52+3.12	2.7975		8.64	13.8068	functional tooth	5.52+3.12	2.88			9.75812	4.04872	13.8068	8.64	2.88
						2.5875	1.45319			1.1875		2.67	1.45319			1.27			0.866041	0.587145	1.45319	2.67	1.27
	13					7.5575	9.28848	functional tooth		2.1175		7.64	9.28959	functional tooth		2.2			6.8937	2.39478	9.28848	7.64	2.2
						0.5675	0.0707426			0.1975		0.65	0.0696314			0.28			0.0474086	0.0233339	0.0707426	0.65	0.28
	14					8.6475	17.8504	functional tooth	5.83+2.89	2.6575		8.73	17.8504	functional tooth	5.83+2.89	2.74			13.7472	4.10316	17.8504	8.73	2.74
						1.6175	0.749649			0.8175		1.7	0.749649			0.9			0.425844	0.323805	0.749649	1.7	0.9
	15					7.2475	11.3533	functional tooth	4.60+2.73	3.0575		7.33	11.3533	functional tooth	4.60+2.73	3.14			6.23035	5.12291	11.3533	7.33	3.14
						2.6275	2.51442			1.3675		2.71	2.51442			1.45			1.29892	1.21549	2.51442	2.71	1.45
	16					5.9175	9.66071	functional tooth		2.1575		6	9.66071	functional tooth		2.24			6.4148	3.24592	9.66071	6	2.24
						0.6175	0.120188			0.3975		0.7	0.120188			0.48			0.0592608	0.0609275	0.120188	0.7	0.48
	17					6.4675	11.2189	functional tooth		2.7575		6.55	11.2189	functional tooth		2.84			6.45794	4.76096	11.2189	6.55	2.84
						1.1875	0.539644			0.7275		1.27	0.539644			0.81			0.209357	0.330286	0.539644	1.27	0.81
	18					6.1175	7.74955	functional tooth	3.24+2.96	2.4875		6.2	7.74955	functional tooth	3.24+2.96	2.57			3.72806	4.02149	7.74955	6.2	2.57
						2.7075	2.29691			1.3275		2.79	2.29691			1.41			0.969932	1.32698	2.29691	2.79	1.41
	19					6.0475	8.31012	functional tooth		2.5875		6.13	8.31012	functional tooth		2.67			4.40484	3.90529	8.31012	6.13	2.67
						0.9075	0.336768			0.5175		0.99	0.336768			0.6			0.129355	0.207413	0.336768	0.99	0.6
	20					5.4375	4.81114	functional tooth		2.5175		5.52	4.81114	functional tooth		2.6			2.06348	2.74766	4.81114	5.52	2.6
						1.6275	1.07392			1.0275		1.71	1.07392			1.11			0.305934	0.767983	1.07392	1.71	1.11
Small Alligator	1					3.2028	0.629024	functinal tooth		1.4328		3.23	0.629024	functinal tooth		1.46			0.331577	0.297447	0.629024	3.23	1.46
refenrence depth						0.2528	0.0034546			0.1628		0.28	0.0034546			0.19			0.00159935	0.00185525	0.0034546	0.28	0.19
n.a.	2					2.5328	0.371785	functional tooth	2.25+0.31	1.7728		2.56	0.371785	functional tooth	2.25+0.31	1.8			0.0476606	0.324124	0.371785	2.56	1.8
Pmx						1.1528	0.139143			0.7728		1.18	0.139143			0.8			0.059048	0.0800955	0.139143	1.18	0.8
	3					4.9228	1.49837	functinal tooth	4.83+0.12	1.7928		4.95	1.49837	functinal tooth	4.83+0.12	1.82			0.88057	0.617797	1.49837	4.95	1.82
						1.0528	0.100599			0.5328		1.08	0.100599			0.56			0.0545378	0.0460613	0.100599	1.08	0.56
	4					4.1328	1.32007	functional tooth	3.93+0.23	1.4328		4.16	1.32014	functional tooth	3.93+0.23	1.46			0.901554	0.418518	1.32007	4.16	1.46
						0.5328	0.0231266			0.3128		0.56	0.0230626			0.34			0.0142662	0.0088604	0.0231266	0.56	0.34
	5					4.5928	1.21103	functional tooth	4.46+0.16	1.7628		4.62	1.21103	functional tooth	4.46+0.16	1.79			0.698916	0.512112	1.21103	4.62	1.79
						0.9928	0.0880922			0.5628		1.02	0.0880922			0.59			0.0512752	0.036817	0.0880922	1.02	0.59
Small Alligator	1					4.5528	1.12674	functional tooth		1.6928		4.58	1.12674	functional tooth		1.72			0.619556	0.507186	1.12674	4.58	1.72
refenrence depth						0.6928	0.0479485			0.4728		0.72	0.0479485			0.5			0.0219111	0.0260374	0.0479485	0.72	0.5
n.a.	2					4.2228	1.53774	functional tooth	4.14+0.11	2.4328		4.25	1.53774	functional tooth	4.14+0.11	2.46			0.579221	0.958523	1.53774	4.25	2.46
Mx						1.8028	0.290762			0.9528		1.83	0.290762			0.98			0.142086	0.148676	0.290762	1.83	0.98
	3					6.3228	2.79448	functional tooth		1.7928		6.35	2.79448	functional tooth		1.82			2.12058	0.673902	2.79448	6.35	1.82
						1.1028	0.138088			0.6028		1.13	0.138088			0.63			0.0818228	0.0562651	0.138088	1.13	0.63
	4					4.9028	2.97866	functional tooth	4.86+0.07	2.5128	1.40 if the thin area is just a crack	4.93	2.96923	functional tooth	4.86+0.07	2.54	1.40 if the thin area is just a crack		1.41216	1.5665	2.97866	4.93	2.54
						2.8028	0.88652			1.2228		2.83	0.88652			1.25			0.55152	0.335	0.88652	2.83	1.25
	5					5.8728	3.03909	functional tooth	5.73+0.17	1.8328		5.9	3.03909	functional tooth	5.73+0.17	1.86			2.23708	0.80201	3.03909	5.9	1.86
						0.8928	0.0709792			0.5028		0.92	0.0709792			0.53			0.0388962	0.032083	0.0709792	0.92	0.53
	6					4.0428	1.41511	functional tooth	3.61+0.46	2.1928		4.07	1.41511	functional tooth	3.61+0.46	2.22			0.479709	0.935396	1.41511	4.07	2.22
						1.8428	0.364076			0.9328		1.87	0.364076			0.96			0.20718	0.156896	0.364076	1.87	0.96
	7					4.0528	1.31614	functional tooth	3.93+0.15	2.0628		4.08	1.31614	functional tooth	3.93+0.15	2.09			0.554655	0.761483	1.31614	4.08	2.09
						0.7128	0.0684842			0.4228		0.74	0.0684842			0.45			0.0358254	0.0326587	0.0684842	0.74	0.45
	8					3.1028	1.23284	functional tooth	2.90+0.23	2.1028		3.13	1.23284	functional tooth	2.90+0.23	2.13			0.2867	0.946144	1.23284	3.13	2.13
						2.1128	0.549633			1.0628		2.14	0.549633			1.09			0.311681	0.237951	0.549633	2.14	1.09
						0.1628	0.0027189			0.1628		0.19	0.0027189			0.19			0.00131147	0.00140743	0.0027189	0.19	0.19
	9					4.7628	2.02193	functional tooth		2.2828		4.79	2.02193	functional tooth		2.31			0.856996	1.16493	2.02193	4.79	2.31
						1.0028	0.118			0.6128		1.03	0.118			0.64			0.0530025	0.0649976	0.118	1.03	0.64
	10					3.9328	1.8666	functional tooth		1.3528		3.96	1.79412	functional tooth		1.38			1.33802	0.528585	1.8666	3.96	1.38
						0.4628	0.0240542			0.2828		0.49	0.0240542			0.31			0.00895636	0.0150979	0.0240542	0.49	0.31
	11					4.7328	2.77439	functional tooth	4.11+0.65	2.3028		4.76	2.77439	functional tooth	4.11+0.65	2.33			1.15703	1.61736	2.77439	4.76	2.33
						1.3928	0.322461			0.7528		1.42	0.322461			0.78			0.149891	0.17257	0.322461	1.42	0.78
	12					4.5628	2.3585	functional tooth		1.5628		4.59	2.3585	functional tooth		1.59			1.41427	0.944224	2.3585	4.59	1.59
						0.3628	0.0152578			0.2028		0.39	0.0152578			0.23			0.00764489	0.00761291	0.0152578	0.39	0.23
	13					3.8828	1.67794	functional tooth	3.50+0.41	2.0528		3.91	1.67794	functional tooth	3.50+0.41	2.08			0.45204	1.2259	1.67794	3.91	2.08
						0.7228	0.111763			0.4528		0.75	0.111763			0.48			0.0407834	0.0709792	0.111763	0.75	0.48
	14					3.2228	1.08113	functional tooth	3.11+0.14	1.3528		3.25	1.08113	functional tooth	3.11+0.14	1.38			0.474367	0.606762	1.08113	3.25	1.38
	15					2.8728	0.762858	functional tooth		1.7528		2.9	0.762858	functional tooth		1.78			0.189715	0.573143	0.762858	2.9	1.78
						0.3328	0.0119631			0.3328		0.36	0.0119631			0.36			0.00562971	0.00633343	0.0119631	0.36	0.36
	16					1.1528	0.134377	functional tooth		0.6828		1.18	0.134377	functional tooth		0.71			0.0232546	0.111123	0.134377	1.18	0.71
Small Alligator	1					5.1628	2.39723			2.1428		5.19	2.39723			2.17			1.38321	1.01402	2.39723	5.19	2.17
refenrence depth						1.4828	0.228323			0.6628		1.51	0.228323			0.69			0.147108	0.081215	0.228323	1.51	0.69
n.a.	2					2.1728	0.680875	functional tooth	1.62+0.58	1.6228		2.2	0.680875	functional tooth	1.62+0.58	1.65			0.135049	0.545826	0.680875	2.2	1.65
Dent						2.0728	0.468002			0.8228		2.1	0.468002			0.85			0.258615	0.209387	0.468002	2.1	0.85
	3					4.4428	1.28812	functional tooth		1.8428		4.47	1.28812	functional tooth		1.87			0.682667	0.60545	1.28812	4.47	1.87
						1.0928	0.0917387			0.5428		1.12	0.0917387			0.57			0.0485563	0.0431825	0.0917387	1.12	0.57
	4					3.7528	1.12767	functional tooth		1.2328		3.78	1.12767	functional tooth		1.26			0.785057	0.342613	1.12767	3.78	1.26
						0.3628	0.0110035		0.31+0.08	0.1928		0.39	0.0110035		0.31+0.08	0.22			0.00636541	0.00463812	0.0110035	0.39	0.22
	5					4.1828	1.10822	functional tooth		1.5728		4.21	1.10822	functional tooth		1.6			0.632863	0.475359	1.10822	4.21	1.6
						0.6328	0.0450377			0.3228		0.66	0.0450377			0.35			0.0249499	0.0200878	0.0450377	0.66	0.35
	6					3.2428	0.779683	functional tooth		1.9228		3.27	0.779683	functional tooth		1.95			0.22538	0.554303	0.779683	3.27	1.95
						0.9528	0.127436			0.5628		0.98	0.127436			0.59			0.0785281	0.0489081	0.127436	0.98	0.59
	7					3.1928	0.561308	functional tooth		1.0828		3.22	0.561308	functional tooth		1.11			0.347187	0.214121	0.561308	3.22	1.11
						0.1728	0.0022071			0.1728		0.2	0.0022071			0.2			0.00153538	0.000671727	0.0022071	0.2	0.2
	8					3.0428	0.503731	functional tooth		1.7028		3.07	0.503731	functional tooth		1.73			0.127436	0.376295	0.503731	3.07	1.73
						0.9528	0.0681323		0.80+0.18	0.4528		0.98	0.0681323		0.80+0.18	0.48			0.0403996	0.0277327	0.0681323	0.98	0.48
	9					3.1028	0.47731	functional tooth		1.1128		3.13	0.47731	functional tooth		1.14			0.255032	0.222278	0.47731	3.13	1.14
						0.1628	0.00227108			0.1628		0.19	0.00227108			0.19			0.00111955	0.00115153	0.00227108	0.19	0.19
	10					3.1828	0.579573	functional tooth	2.61+0.60	1.8128		3.21	0.579573	functional tooth	2.61+0.60	1.84			0.14263	0.436942	0.579573	3.21	1.84
						0.7228	0.0654134			0.4628		0.75	0.0654134			0.49			0.0353137	0.0300998	0.0654134	0.75	0.49
	11					3.8828	0.945696	functional tooth	3.80+0.11	1.4928		3.91	0.945696	functional tooth	3.80+0.11	1.52			0.510001	0.435695	0.945696	3.91	1.52
						0.4528	0.027061			0.2828		0.48	0.027061			0.31			0.0154177	0.0116433	0.027061	0.48	0.31
	12					3.5628	1.21445	functional tooth	3.32+0.27	2.1328		3.59	1.21445	functional tooth	3.32+0.27	2.16			0.314368	0.900082	1.21445	3.59	2.16
						1.6128	0.350226			0.9228		1.64	0.350226			0.95			0.200495	0.149731	0.350226	1.64	0.95
	13					5.3928	2.37507	functional tooth	5.13+0.29	1.8128		5.42	2.37507	functional tooth	5.13+0.29	1.84			1.5499	0.825169	2.37507	5.42	1.84
						0.8028	0.0683242			0.4528		0.83	0.0683242			0.48			0.0340662	0.0342581	0.0683242	0.83	0.48
	14					4.1228	1.76831	functional tooth	3.77+0.38	2.2828		4.15	1.76831	functional tooth	3.77+0.38	2.31			0.635486	1.13282	1.76831	4.15	2.31
						1.6928	0.379014			0.8328		1.72	0.379014			0.86			0.208587	0.170427	0.379014	1.72	0.86
	15					4.2528	1.64803	functional tooth	3.83+0.45	1.5728		4.28	1.64803	functional tooth	3.83+0.45	1.6			0.854341	0.793694	1.64803	4.28	1.6
						0.3028	0.0135625			0.2328		0.33	0.0135625			0.26			0.00943617	0.00412632	0.0135625	0.33	0.26
	16					3.7128	1.48784	functional tooth	2.30+1.44	2.0428		3.74	1.48784	functional tooth	2.30+1.44	2.07			0.384996	1.10285	1.48784	3.74	2.07
						0.8428	0.169851			0.5328		0.87	0.169851			0.56			0.0730263	0.0968247	0.169851	0.87	0.56
	17					3.3428	1.22741	functional tooth		1.4128		3.37	1.22741	functional tooth		1.44			0.53204	0.695365	1.22741	3.37	1.44
						0.1528	0.00486202			0.1528		0.18	0.00486202			0.18			0.00371049	0.00115153	0.00486202	0.18	0.18
	18					3.3828	1.1998	functional tooth	2.20+1.21	1.8628		3.41	1.1998	functional tooth	2.20+1.21	1.89			0.274129	0.925672	1.1998	3.41	1.89
						0.6828	0.110387			0.4328		0.71	0.110387			0.46			0.0506034	0.0597837	0.110387	0.71	0.46
	19					3.4828	1.01853	functional tooth		1.6428		3.51	1.01853	functional tooth		1.67			0.380869	0.637661	1.01853	3.51	1.67
						0.1128	0.00281486			0.1128		0.14	0.00281486			0.14			0.00198319	0.000831662	0.00281486	0.14	0.14
	20					2.8328	0.659604	functional tooth	2.02+0.84	2.8328	(all crown)	2.86	0.659604	functional tooth	2.02+0.84	2.86	(all crown)		0.191858	0.467746	0.659604	2.86	2.86
						0.4228	0.0432784			0.3028		0.45	0.0432784			0.33			0.022231	0.0210474	0.0432784	0.45	0.33
Large Alligator	1					27.255	290.139	functional tooth		5.655		27.25	286.419	functional tooth	(27.25-22.62)	4.63		3.73163	259.625	30.5144	290.139	27.43	5.83
refenrence depth	2					23.265	249.086	functional tooth	22.21+1.23	8.055		23.08	248.703	functional tooth	21.85+1.23	8.23		0.385024	175.041	74.0453	249.086	23.44	8.23
n.a.						7.955	28.0776		-4.81	3.145		8.13	28.0698		-4.81	3.32			17.4056	10.672	28.0776	8.13	3.32
Pmx	3					39.015	1013.04	functional tooth	37.67+1.52	11.455		38.86	1012.23	functional tooth	37.34+1.52	11.63		0.814412	784.966	228.075	1013.04	39.19	11.63
						13.365	94.1748			4.795		13.54	94.1748			4.97			62.4709	31.7039	94.1748	13.54	4.97
	4							empty alveolus						empty alveolus
	5					37.615	855.405	functional tooth		8.645		37.44	854.13	functional tooth		8.66		1.27368	736.924	118.481	855.405	37.79	8.82
						6.505	28.0284			2.965		6.68	28.0284			3.14			14.1636	13.8648	28.0284	6.68	3.14
Large Alligator	1					27.005	431.129	functional tooth	26.18+1.00; tip missing	7.205		26.56	423.939	functional tooth	25.56+1.00; tip missing	6.75		7.22558	331.688	99.4408	431.129	27.18	7.38
refenrence depth						8.985	43.7893			3.915		9.16	43.7893			4.09			24.0947	19.6946	43.7893	9.16	4.09
n.a.						0.895	0.449386			0.575		1.07	0.449386			0.75			0.158147	0.291239	0.449386	1.07	0.75
Mx	2					20.825	2.05591		19.0+2.00	1.185		21	2.05591		19.0+2.00	1.36		complete	0.966583	1.08933	2.05591	21	1.36
	3					42.415	1275.93	functional tooth	broken and split tip	5.455		41.56	1263.82	functional tooth	broken and split tip	4.76		12.2684	1150.66	125.27	1275.93	42.59	5.63
	4					62.495	5008.19	functional tooth	broken and split tip	12.725		60.74	4818.32	functional tooth	broken and split tip	12.63		190.477	4358.45	649.748	5008.19	62.67	12.9
	5					35.205	839.579		33.82+1.56 ; split tip, small part missing	6.025		34.71	820.563		33.15+1.56 ; split tip, small part missing	5.6		19.0938	728.085	111.494	839.579	35.38	6.2
	6					31.685	748.652			8.825		31.46	747.544			8.77		0.781312	572.718	175.933	748.652	31.86	9
						7.465	54.4872		-5.41	2.055		7.64	54.4842		-5.41	2.23			35.7176	18.7696	54.4872	7.64	2.23
	7					28.485	517.512			6.225		28.42	517.476			6.13		0.0285033	417.239	100.273	517.512	28.66	6.4
						3.005	5.19955		2.82+0.36	1.785		3.18	5.19955		2.82+0.36	1.96			2.53242	2.66713	5.19955	3.18	1.96
	8					31.395	665.707			6.215		31.2	665.509			6.1		0.189179	552.196	113.512	665.707	31.57	6.39
						1.235	1.34747			0.955		1.41	1.34747			1.13			0.497888	0.849582	1.34747	1.41	1.13
	9							empty alveolus						empty alveolus
	10					42.205	1986.87			10.435		41.88	1985.25			10.24		1.57848	1592.55	394.317	1986.87	42.38	10.61
						11.605	131.283			4.225		11.78	131.278			4.4			85.9206	45.3623	131.283	11.78	4.4
	11					42.235	1459.51			6.855		41.91	1459.29			6.67		0.205499	1279.3	180.215	1459.51	42.41	7.03
						2.175	6.41071			1.435		2.35	6.41071			1.61			3.35051	3.0602	6.41071	2.35	1.61
	12					31.695	1007.15			7.765		31.4	1005.26			7.61		1.92052	794.852	212.296	1007.15	31.87	7.94
						5.325	46.0512			2.905		5.5	46.0512			3.08			20.2072	25.844	46.0512	5.5	3.08
	13					26.395	614.655			6.415		26.35	614.589			6.35		0.0714881	488.846	125.809	614.655	26.57	6.59
						2.205	6.75735			1.685		2.38	6.75735			1.86			1.71043	5.04692	6.75735	2.38	1.86
	14					21.165	428.242		16.02+5.32	6.175		20.98	427.964		15.66+5.32	6.22		0.284113	312.133	116.109	428.242	21.34	6.35
	15					16.945	209.627		16.63+0.49	4.555		17.21	207.235		16.72+0.49	4.98		2.39382	154.494	55.1325	209.627	17.12	4.73
Large Alligator	1							empty alveolus						empty alveolus
refenrence depth	2					32.575	417.824	functional tooth	31.98+0.77	4.625		32.42	417.154	functional tooth	31.65+0.77	4.47		0.704893	369.935	47.8892	417.824	32.75	4.8
n.a.						1.935	4.67238			1.175		2.11	4.67238			1.35			1.99513	2.67726	4.67238	2.11	1.35
Dent	3							empty alveolus						empty alveolus					0
	4					43.715	966.114	functional tooth	crack of crown base	12.865		43.66	964.162	functional tooth	crack of crown base	13		1.87833	608.927	357.187	966.114	43.89	13.04
						28.655	469.994		split apex	4.565		28.83	469.994		split apex	4.74			405.912	64.0818	469.994	28.83	4.74
						3.115	3.24352	might be		1.195		3.29	3.24352	might be		1.37			1.42381	1.81971	3.24352	3.29	1.37
						3.545	2.0864	one split		1.595		3.72	2.0864	one split		1.77			1.42749	0.658911	2.0864	3.72	1.77
	5					30.015	461.985	functional tooth		7.425		30.17	461.985	functional tooth		7.57			375.691	86.2946	461.985	30.19	7.6
						5.805	11.4482	might be		2.505		5.98	11.4482	might be		2.68			5.97986	5.46832	11.4482	5.98	2.68
						5.625	5.48832	one split	4.89+0.91	2.095		5.8	5.48832	one split	4.89+0.91	2.27			3.56056	1.92776	5.48832	5.8	2.27
	6					24.315	267.762	functional tooth	rounded tip	5.565		24.11	266.854	functional tooth	rounded tip	5.38		1.00078	216.289	51.4723	267.762	24.49	5.74
						6.225	11.6967			3.115		6.4	11.6967			3.29			5.83939	5.85732	11.6967	6.4	3.29
	7					21.195	168.415	functional tooth		4.385		21.35	168.329	functional tooth		4.46		0.102998	141.961	26.4542	168.415	21.37	4.56
						2.015	1.1939		apex points distally	1.135		2.19	1.1939		apex points distally	1.31			0.518439	0.675465	1.1939	2.19	1.31
	8					20.045	184.648	functional tooth	rounded tip	4.215		20.09	184.494	functional tooth	rounded tip	4.31		0.165303	149.523	35.1246	184.648	20.22	4.39
						3.545	5.47706		apex points distally and ventral	1.875		3.72	5.47706		apex points distally and ventral	2.05			2.84026	2.63679	5.47706	3.72	2.05
	9					18.265	164.824	functional tooth	15.09+3.35	5.565		18.36	164.749	functional tooth	15.01+3.35	5.16		0.0820765	117.309	47.5152	164.824	18.44	5.74
						7.385	25.1021			3.365		7.56	25.1021			3.54			14.5374	10.5647	25.1021	7.56	3.54
						0.585	0.177258		upside down	0.425		0.76	0.177258		upside down	0.6			0.0696616	0.107596	0.177258	0.76	0.6
	10					21.315	183.917	functional tooth		4.555		21.38	183.795	functional tooth		4.63		0.1722	149.305	34.6117	183.917	21.49	4.73
						2.505	2.95338			1.545		2.68	2.90533			1.72			1.37346	1.57992	2.95338	2.68	1.72
	11					25.985	296.444	functional tooth		5.025		26.1	296.245	functional tooth		5.11		0.189213	248.533	47.9109	296.444	26.16	5.2
	12					36.585	931.449	functional tooth	crack at crown base	9.475		36.69	931.085	functional tooth	crack at crown base	9.6		0.335433	733.366	198.082	931.449	36.76	9.65
						5.355	16.3243		apex points distally	2.345		5.53	16.3213		apex points distally	2.52			7.58714	8.73713	16.3243	5.53	2.52
	13					45.025	2305.2	functional tooth	crack at crown base	11.975		45.15	2304.65	functional tooth	crack at crown base	12.06		0.477055	1827.76	477.435	2305.2	45.2	12.15
						13.045	130.832		split in 2	3.925		13.22	130.832		split in 2	4.1			82.7016	48.1306	130.832	13.22	4.1
	14					38.215	1332.21	functional tooth	crown base split	7.705		38.34	1331.29	functional tooth	crown base split	7.72		0.891576	1175.11	157.094	1332.21	38.39	7.88
	15					28.035	691.274	functional tooth	22.53+5.68	6.975		28.36	689.694	functional tooth	22.34+5.68	6.91		1.59693	526.868	164.407	691.274	28.21	7.15
						8.865	91.0833			3.475		9.04	91.0833			3.65			48.4327	42.6506	91.0833	9.04	3.65
	16					26.125	569.975	functional tooth		5.265		26.08	569.247	functional tooth		5.2		0.747655	465.191	104.784	569.975	26.3	5.44
						1.485	2.65657			0.985		1.66	2.65657			1.16			2.65657	0	2.65657	1.66	1.16

## Sheet: Tooth measurements
teeth of Alligators according to their position					[mm]
		maxilla sin														premaxilla sin						premaxilla dext
		dentary sin
		20	19	18	17	16	15	14	13	12	11	10	9	8	7	6	5	4	3	2	1	1	2	3	4	5	6	7	8	9	10	11	12	13	14	15	16	17	18	19	20
Replacement tooth
f	upper jaw medium sized Alligator																					5.7075	5.1275	9.0275	11.4175	7.8175	8.0075	7.2875	12.2975	9.9875	11.1875	9.6375	8.2475	9.0675	8.8675	10.3075	6.9075	8.6975	7.4375	6.1675	5.7775	upper jaw medium sized Alligator			1
	dentary medium sized Alligator																					9.3875	8.1275	8.5175	11.1275	7.5675	6.7075	5.2275	6.0175	5.8175	5.8175	5.5675	8.5575	7.5575	8.6475	7.2475	5.9175	6.4675	6.1175	6.0475	5.4375	dentary medium sized Alligator
1	upper jaw medium sized Alligator																					1.2775	2.1875	3.0175	2.2675	2.8275	2.0075	5.7975	3.3075	1.6375	2.4175	3.1275	1.2375	2.7675	1.2775	2.8875	0.7775	1.6675	2.0675	0.7775	1.6075	upper jaw medium sized Alligator			2
	dentary medium sized Alligator																					3.1675	1.7175	4.5175	2.2675	2.0675	0.8775	2.2075	1.1475	0.2875	1.3975	0.7575	2.5875	0.5675	1.6175	2.6275	0.6175	1.1875	2.7075	0.9075	1.6275	dentary medium sized Alligator
2	upper jaw medium sized Alligator																									0.3775		1.0075				0.3075										upper jaw medium sized Alligator			3
	dentary medium sized Alligator																							0.5175																		dentary medium sized Alligator
																																										average size difference
lower teeth/upper teeth																						0.607989	0.630883	1.05988	1.02606	1.03304	1.19381	1.39407	2.04362	1.7168	1.92308	1.73103	0.963774	1.1998	1.02544	1.42221	1.1673	1.3448	1.21577	1.01984	1.06253	1.23909
																						0.403315	1.27365	0.667958	1	1.36759	2.28775	2.62627	2.88235	5.69565	1.72987	4.12871	0.478261	4.87665	0.789799	1.09895	1.25911	1.40421	0.76362	0.856749	0.987711	1.82891
																								0
																premaxilla sin
		maxilla sin																				premaxilla dext
		dentary sin
		20	19	18	17	16	15	14	13	12	11	10	9	8	7	6	5	4	3	2	1	1	2	3	4	5	6	7	8	9	10	11	12	13	14	15	16	17	18	19	20	21
Replacement tooth
f	upper jaw medium sized Alligator																					3.2028	2.5328	4.9228	4.1328	4.5928	4.5528	4.2228	6.3228	4.9028	5.8728	4.0428	4.0528	3.1028	4.7628	3.9328	4.7328	4.5628	3.8828	3.2228	2.8728	1.1528	upper jaw medium sized Alligator		f
	dentary medium sized Alligator																					5.1628	2.1728	4.4428	3.7528	4.1828	3.2428	3.1928	3.0428	3.1028	3.1828	3.8828	3.5628	5.3928	4.1228	4.2528	3.7128	3.3428	3.3828	3.4828	2.8328		dentary medium sized Alligator
1	upper jaw medium sized Alligator																					0.2528	1.1528	1.0528	0.5328	0.9928	0.6928	1.8028	1.1028	2.8028	0.8928	1.8428	0.7128	2.1128	1.0028	0.4628	1.3928	0.3628	0.7228		0.3328		upper jaw medium sized Alligator		1
	dentary medium sized Alligator																					1.4828	2.0728	1.0928	0.3628	0.6328	0.9528	0.1728	0.9528	0.1628	0.7228	0.4528	1.6128	0.8028	1.6928	0.3028	0.8428	0.1528	0.6828	0.1128	0.4228		dentary medium sized Alligator
2	upper jaw medium sized Alligator																																	0.1628									upper jaw medium sized Alligator		2
	dentary medium sized Alligator																																										dentary medium sized Alligator
																																											average size difference
lower teeth/upper teeth																						0.620361	1.16568	1.10804	1.10126	1.09802	1.40397	1.3226	2.07795	1.58012	1.84517	1.04121	1.13753	0.57536	1.15523	0.924755	1.27473	1.36496	1.14781	0.925347	1.01412		1.19421
																						0.170488	0.556156	0.963397	1.46858	1.5689	0.72712	10.4329	1.15743	17.2162	1.2352	4.06979	0.441964	2.63179	0.592391	1.5284	1.65259	2.37435	1.05858	0	0.787133		2.53167
		maxilla sin																				premaxilla dext
		dentary sin
		20	19	18	17	16	15	14	13	12	11	10	9	8	7	6	5	4	3	2	1	1	2	3	4	5	6	7	8	9	10	11	12	13	14	15	16	17	18	19	20	21
Replacement tooth
f	upper jaw medium sized Alligator																					27.255	23.265	39.015		37.615	27.005	20.825	42.415	62.495	35.205	31.685	28.485	31.395		42.205	42.235	31.695	26.395	21.165	16.945		upper jaw medium sized Alligator		f
	dentary medium sized Alligator																					32.575		43.715	30.015	24.315	21.195	20.045	18.265	21.315	25.985	36.585	45.025	38.215	28.035	26.125							dentary medium sized Alligator
1	upper jaw medium sized Alligator																						7.955	13.365		6.505	8.985					7.465	3.005	1.235		11.605	2.175	5.325	2.205				upper jaw medium sized Alligator		1
	dentary medium sized Alligator																					1.935		28.655	5.805	6.225	2.015	3.545	7.385	2.505		5.355	13.045		8.865	1.485							dentary medium sized Alligator
2	upper jaw medium sized Alligator																										0.895								31.695								upper jaw medium sized Alligator		2
	dentary medium sized Alligator																							3.115	5.625				0.585														dentary medium sized Alligator
																								3.545																			average size difference
lower teeth/upper teeth																						0.836685		0.892485	0	1.27412	1.03891	2.3222	1.65165	1.09621	0.858139	0	1.10441	1.50651	1.21321
																						0		0.466411	0	4.45906	0	0	0		1.39402	0.230356		0	7.81481
																								0	0			0

## Sheet: Tooth size Developmental st
	Measurements of teeth
	Premaxilla				dext																Premaxilla				dext																Premaxilla				dext
	Medium Alligator	Functional tooth						Tooth position 1 (labial)						Tooth position 2							Large Alligator	Functional tooth						Tooth position 1 (labial)						Tooth position 2							Small Alligator	Functional tooth						Tooth position 1 (labial)
		tooth height	crown height	volume	developmental stage	size compared to tooth befoe	estimated age	tooth height	crown height	volume	developmental stage	size compared to tooth before	estimated age	tooth height	crown height		developmental stage	size compared to tooth befoe	estimated age			tooth height	crown height	volume	developmental stage	size compared to tooth befoe		tooth height	crown height	volume	developmental stage	size compared to tooth befoe		tooth height	crown height	volume	developmental stage	size compared to tooth before				tooth height	crown height	volume	developmental stage	size compared to tooth befoe	average VEL	tooth height	crown height
	1. alveolus	5.7075	2.4475	2.28173	4		30.5583	1.2775	0.6275	0.21732	2	0.223828						0			1. alveolus	27.255	5.655	290.139	2																1. alveolus	3.2028	1.4328	0.629024	6			0.2528	0.1628
	2. alveolus	5.1275	2.1575	3.0836	5			2.1875	0.9175	0.687425	3	0.426621						0			2. alveolus	23.265	8.055	249.086	3			7.955	3.145	28.0776	2	0.34193									2. alveolus	2.5328	1.7728	0.371785	7			1.1528	0.7728
	3. alveolus	9.0275	2.9475	12.2091	7		33.822	3.0175	1.0375	1.603	2	0.334256	43.1074					0			3. alveolus	39.015	11.455	1013.04	6			13.365	4.795	94.1748	3	0.342561									3. alveolus	4.9228	1.7928	1.49837	7		0.0166667	1.0528	0.5328
	4. alveolus	11.4175	2.5375	21.3727	6			2.2675	0.9175	0.86493	3	0.198599						0			4. alveolus																				4. alveolus	4.1328	1.4328	1.32007	6			0.5328	0.3128
	5.alveolus	7.8175	2.6075	7.32204	6			2.8275	1.3775	1.19799	4	0.361689		0.3775	0.1175	0.015093	1	0.13351			5.alveolus	37.615	8.645	855.405	5			6.505	2.965	28.0284	1	0.172936									5.alveolus	4.5928	1.7628	1.21103	7			0.9928	0.5628
											average	0.308999					average	0.13351													average	0.285809					average
																																									Maxilla				dext
	Maxilla				dext																Maxilla				dext																Small Alligator	Functional tooth						Tooth position 1 (labial)
	Medium Alligator	Functional tooth						Tooth position 1 (labial)						Tooth position 2							Large Alligator	Functional tooth						Tooth position 1 (labial)						Tooth position 2								tooth height	crown height	volume	developmental stage	size compared to tooth before	estimated age	tooth height	crown height
		tooth height	crown height	volume	developmental stage	size compared to tooth before	estimated age	tooth height	crown height	volume	developmental stage	size compared to tooth before	estimated age	tooth height	crown height	volume	developmental stage	size compared to tooth before	estimated age			tooth height	crown height	volume	developmental stage	size compared to tooth before		tooth height	crown height	volume	developmental stage	size compared to tooth before		tooth height	crown height	volume	developmental stage	size compared to tooth before			1. alveolus	4.5528	1.6928	1.12674	6			0.6928	0.4728
	1. alveolus	8.0075	2.6075	7.74965	6			2.0075	0.6775	0.549644	2	0.250702									1. alveolus	27.005	7.205	431.129	4			8.985	3.915	43.7893	2	0.332716		0.895	0.575	0.449386	0	0.0996105			2. alveolus	4.2228	2.4328	1.53774	8			1.8028	0.9528
	2. alveolus	7.2875	3.5275	7.61631	7			5.7975	2.0075	5.33875	4	0.79554		1.0075	0.3275	0.159449	1	0.173782			2. alveolus	20.825	1.185	2.05591	1																3. alveolus	6.3228	1.7928	2.79448	7			1.1028	0.6028
	3. alveolus	12.2975	2.9475	30.1717	6			3.3075	1.0375	2.04579	3	0.268957									3. alveolus	42.415	5.455	1275.93	3																4. alveolus	4.9028	2.5128	2.97866	9			2.8028	1.2228
	4. alveolus	9.9875	2.6375	18.7089	7			1.6375	0.4875	0.468438	2	0.163955									4. alveolus	62.495	12.725	5008.19	7																5. alveolus	5.8728	1.8328	3.03909	7			0.8928	0.5028
	5. alveolus	11.1875	2.8175	22.7832	8			2.4175	0.9275	0.96734	3	0.216089									5. alveolus	35.205	6.025	839.579	4																6. alveolus	4.0428	2.1928	1.41511	9		0.0126667	1.8428	0.9328
	6. alveolus	9.6375	3.3175	16.4975	9		24.087	3.1275	1.3575	2.14117	1	0.324514	29.3333	0.3075	0.0575	0.0167597	0	0.0983213			6. alveolus	31.685	8.825	748.652	5			7.465	2.055	54.4872	2	0.2356									7. alveolus	4.0528	2.0628	1.31614	7		0.0153333	0.7128	0.4228
	7. alveolus	8.2475	2.3175	9.22033	7		39.2	1.2375	0.5875	0.310378	1	0.150045									7. alveolus	28.485	6.225	517.512	3			3.005	1.785	5.19955	1	0.105494									8. alveolus	3.1028	2.1028	1.23284	9			2.1128	1.0628
	8. alveolus	9.0675	2.7375	14.8317	6			2.7675	1.2875	1.77884	4	0.305211									8. alveolus	31.395	6.215	665.707	3			1.235	0.955	1.34747	1	0.0393375									9. alveolus	4.7628	2.2828	2.02193	10			1.0028	0.6128
	9. alveolus	8.8675	2.2975	12.0575	5			1.2775	0.5575	0.318249	1	0.144065									9. alveolus																				10. alveolus	3.9328	1.3528	1.8666	6			0.4628	0.2828
	10. alveolus	10.3075	3.2575	26.017	7			2.8875	1.2375	2.04579	3	0.280136									10. alveolus	42.205	10.435	1986.87	5			11.605	4.225	131.283	3	0.274967									11. alveolus	4.7328	2.3028	2.77439	10			1.3928	0.7528
	11. alveolus	6.9075	2.2975	11.6512	5			0.7775	0.2475	0.0840762	0	0.112559									11. alveolus	42.235	6.855	1459.51	4			2.175	1.435	6.41071	2	0.0514976									12. alveolus	4.5628	1.5628	2.3585	7		0.012	0.3628	0.2028
	12. alveolus	8.6975	3.0175	20.721	8		30.8519	1.6675	0.8175	0.89206	1	0.191722									12. alveolus	31.695	7.765	1007.15	3			5.325	2.905	46.0512	2	0.168008									13. alveolus	3.8828	2.0528	1.67794	9		0.0116667	0.7228	0.4528
	13. alveolus	7.4375	2.8175	13.689	6		22.1566	2.0675	1.1075	1.52495	1	0.277983	21.4449								13. alveolus	26.395	6.415	614.655	4			2.205	1.685	6.75735	2	0.0835385									14. alveolus	3.2228	1.3528	1.08113	6
	14. alveolus	6.1675	2.1975	7.96021	4			0.7775	0.4175	0.147411	0	0.126064									14. alveolus	21.165	6.175	428.242	4																15. alveolus	2.8728	1.7528	0.762858	7			0.3328	0.3328
	15. alveolus	5.7775	3.0675	5.16152	6			1.6075	0.4175	0.627979	0	0.278235									15. alveolus	16.945	4.555	209.627	3																16. alveolus	1.1528	0.6828	0.134377	3
			2.728						0.9025		average	0.259052						0.136052					7.215						2.715		average	0.143462						0.0996105
									3.02271																				2.65746												Dentary				dext
	Dentary				dext																Dentary				dext																Small Alligator	Functional tooth						Tooth position 1 (labial)
	Medium Alligator	Functional tooth						Tooth position 1 (labial)						Tooth position 2							Large Alligator	Functional tooth						Tooth position 1 (labial)						Tooth position 2								tooth height	crown height	volume	developmental stage	size compared to tooth befoe	estimated age	tooth height	crown height
		tooth height	crown height	volume	developmental stage	size compared to tooth befoe	estimated age	tooth height	crown height	volume	developmental stage	size compared to tooth before	estimated age	tooth height	crown height	volume	developmental stage	size compared to tooth before	estimated age			tooth height	crown height	volume	developmental stage	size compared to tooth befoe		tooth height	crown height	volume	developmental stage	size compared to tooth before		tooth height	crown height	volume	developmental stage	size compared to tooth before			1. alveolus	5.1628	2.1428	2.39723	8			1.4828	0.6628
	1. alveolus	9.3875	2.1175	14.4568	5			3.1675		1.49541	1	0.337417									1. alveolus																				2. alveolus	2.1728	1.6228	0.680875	6		0.0133333	2.0728	0.8228
	2. alveolus	8.1275	2.3875	9.52145	9		11.25	1.7175	0.4275	0.364361	4	0.21132	10.2								2. alveolus	32.575	4.625	417.824	3			1.935	1.175	4.67238	2	0.0594014									3. alveolus	4.4428	1.8428	1.28812	6			1.0928	0.5428
	3. alveolus	8.5175	3.1575	7.5026	7			4.5175	1.4775	2.38015	4	0.530379		0.5175	0.1075	0.0383343	1	0.114555			3. alveolus																				4. alveolus	3.7528	1.2328	1.12767	4		0.0175	0.3628	0.1928
	4. alveolus	11.1275	2.6575	20.1347	7		20.4286	2.2675	0.7675	0.850948	3	0.203774									4. alveolus	43.715	12.865	966.114	11			28.655	4.565	469.994	4	0.655496		3.545	1.595	2.0864	2	0.123713			5. alveolus	4.1828	1.5728	1.10822	5			0.6328	0.3228
	5. alveolus	7.5675	2.1675	7.55344	6			2.0675	0.9475	0.607608	3	0.273208									5. alveolus	30.015	7.425	461.985	7			5.805	2.505	11.4482	2	0.193403									6. alveolus	3.2428	1.9228	0.779683	6			0.9528	0.5628
	6. alveolus	6.7075	1.9175	4.50447	5			0.8775	0.3875	0.123337	2	0.130824									6. alveolus	24.315	5.565	267.762	5			6.225	3.115	11.6967	3	0.256015									7. alveolus	3.1928	1.0828	0.561308	4			0.1728	0.1728
	7. alveolus	5.2275	1.7675	3.99927	5			2.2075	1.0475	0.782983	3	0.422286									7. alveolus	21.195	4.385	168.415	4			2.015	1.135	1.1939	1	0.0950696									8. alveolus	3.0428	1.7028	0.503731	6			0.9528	0.4528
	8. alveolus	6.0175	2.2775	4.41039	7			1.1475	0.5975	0.238247	3	0.190694									8. alveolus	20.045	4.215	184.648	4			3.545	1.875	5.47706	2	0.176852									9. alveolus	3.1028	1.1128	0.47731	4			0.1628	0.1628
	9. alveolus	4.4975	0.9575	2.81415	4			0.2875	0.1675	0.0177782	2	0.0639244									9. alveolus	18.265	5.565	164.824	5			7.385	3.365	25.1021	3	0.404325		0.585	0.425	0.177258	1	0.0792146			10. alveolus	3.1828	1.8128	0.579573	6			0.7228	0.4628
	10. alveolus	5.8175	2.3075	4.55901	7			1.3975	0.6675	0.348435	3	0.240223									10. alveolus	21.315	4.555	183.917	4			2.505	1.545	2.95338	2	0.117523									11. alveolus	3.8828	1.4928	0.945696	7			0.4528	0.2828
	11. alveolus	5.5675	1.6675	4.16502	5		48.2875	0.7575	0.3275	0.0602793	2	0.136057	15.6957								11. alveolus	25.985	5.025	296.444	5																12. alveolus	3.5628	2.1328	1.21445	6		0.0144	1.6128	0.9228
	12. alveolus	8.5575	2.7975	13.8068	7		33.3814	2.5875	1.1875	1.45319	2	0.302366									12. alveolus	36.585	9.475	931.449	8			5.355	2.345	16.3243	2	0.146371									13. alveolus	5.3928	1.8128	2.37507	5			0.8028	0.4528
	13. alveolus	7.5575	2.1175	9.28959	5			0.5675	0.1975	0.0696314	3	0.075091									13. alveolus	45.025	11.975	2305.2	10			13.045	3.925	130.832	4	0.289728									14. alveolus	4.1228	2.2828	1.76831	6			1.6928	0.8328
	14. alveolus	8.6475	2.6575	17.8504	6			1.6175	0.8175	0.749649	3	0.187048									14. alveolus	38.215	7.705	1332.21	7																15. alveolus	4.2528	1.5728	1.64803	5			0.3028	0.2328
	15. alveolus	7.2475	3.0575	11.3533	7			2.6275	1.3675	2.51442	4	0.362539									15. alveolus	28.035	6.975	691.274	6			8.865	3.475	91.0833	2	0.316212									16. alveolus	3.7128	2.0428	1.48784	4			0.8428	0.5328
	16. alveolus	5.9175	2.1575	9.66071	5			0.6175	0.3975	0.120188	1	0.104351									16. alveolus	26.125	5.265	569.975	4			1.485	0.985	2.65657	1	0.0568421									17. alveolus	3.3428	1.4128	1.22741	5			0.1528	0.1528
	17. alveolus	6.4675	2.7575	11.2189	5			1.1875	0.7275	0.539644	2	0.18361									17. alveolus																				18. alveolus	3.3828	1.8628	1.1998	5		0.0145	0.6828	0.4328
	18. alveolus	6.1175	2.4875	7.74955	6		32.1153	2.7075	1.3275	2.29691	3	0.442583									18. alveolus																				19. alveolus	3.4828	1.6428	1.01853	5		0.0125	0.1128	0.1128
	19. alveolus	6.0475	2.5875	8.31012	9		48.2161	0.9075	0.5175	0.336768	1	0.150062	33.7083								19. alveolus																				20. alveolus	2.8328	2.8328	0.659604	8			0.4228	0.3028
	20. alveolus	5.4375	2.5175	4.81114	8			1.6275	1.0275	1.07392	2	0.29931									20. alveolus
	average	7.7385	2.5319	11.2194				1.995	0.886774	1.00588	average	0.242353											6.83						2.50083		average	0.230603						0.101464			average	3.87865	1.78768	1.37067
	averages with enamel	7.841	2.6005	11.2194		2.326			0.756974												average	31.2097	7.05167	829.516					2.73109												averages with enamel	3.90585	1.81488	1.36867
									3.07276												averages with enamel	31.0709	6.96562	821.688
								Not used in this file																															Not used in this file
																Not relaible VEIW
				Thinn section sampled						All teeth in sampled positions																						Large Alligator
				tooth height	TFT (based on transect length)	CAH	TFT (based on CAH)	Tooth growth rate	Tooth growth rate (based on crown height ,mean VEIW of quadrant)	tooth height	TFT (based on transect length)	CAH	age by crown height (with enamel)	average incremental line width (mm)	min increment width	max incement width	SD VEIW	SD TFT																	tooth height	TFT (based on transect length)	CAH	TFT (based on CAH)	Tooth growth rate	Tooth growth rate (based on crown height , mean VEIW of quadrant)	tooth height	TFT (based on transect length)	CAH	age by crown height	average incremental line width (mm)	min increment width	max incement width	SD VEIW	SD TFT
	Pmx	1. alveolus		5.7075	30.5583	2.4475	97.9	0.0233067	0.0135179	5.7075	30.5583	2.4475	105.417	0.025	0.014	0.039	0.0055	11.6548	Pmx	1. alveolus												Pmx	1. alveolus		27.255	76.565	5.655	408.795	0.709743	0.927122	27.255	312.946	5.655	421.446	0.0138333	0.006	0.028	0.00375	141.938
		3. alveolus		9.0275	33.822	2.9475	189.55	0.064411	0.0600617	9.0275	33.822	2.9475	158.639	0.01555	0.008	0.039	0.0052	34.0132		3. alveolus													3. alveolus		39.015	59.5515	11.455	1041.36	0.972802	1.59806	39.015	633.917	11.455	1057.27	0.011	0.006	0.023	0.003	399.878
		3 alveolus replacement					42.2607	0.0379312	0.0224034	3.0175	43.1074	1.0375	45.6365	0.02455	0.014	0.035	0.0051	7.21782		3 alveolus replacement												Mx	6. alveolus		31.685	34.3617	8.825	756.429	0.989719	1.53295	31.685	488.374	8.825	771.429	0.0116667	0.005	0.026	0.00266667	293.892
	Mx	6. alveolus		9.6375	24.087	3.3175	288.478	0.057188	0.0721066	9.6375	24.087	3.3175	295.652	0.0115	0.006	0.026	0.00457347	82.0823	Mx	6. alveolus													6. alveolus replacement		7.465	22.1	2.055	205.5	0.265145	0.479121	7.465	113.723	2.055	223	0.01	0.006	0.014	0.002	51.375
		6. alveolus replacement					36.6892	0.0583597	0.0228707	3.1275	13.595	1.3575	36.689	0.037	0.021	0.058	0.011	15.5223		6. alveolus replacement													7. alveolus		28.485	56.9048	6.225	346.904	1.4918	1.50226	28.485	344.49	6.225	356.656	0.0179444	0.007	0.05	0.00501856	169.564
		7. alveolus		8.2475	39.2	2.3175	231.75	0.0397857	0.0576892	8.2475	39.2	2.3175	240	0.01	0.006	0.019	0.004	66.2143		7. alveolus													7. alveolus replacement		3.005	29.1655	1.785	89.25	0.0582583	0.0526369	3.005	98.7815	1.785	98	0.02	0.006	0.044	0.0054	36.0587
		12. alveolus		8.6975	30.8519	3.0175	274.318	0.0755364	0.0995707	8.6975	30.8519	3.0175	287.037	0.011	0.005	0.02	0.003	56.9468		12. alveolus													12. alveolus		31.695	16.6389	7.765	228.382	4.40992	2.34377	31.695	429.713	7.765	233.529	0.034	0.015	0.061	0.024	108.263
		13. alveolus		7.4375	22.1566	2.8175	208.704	0.0655906	0.0704492	7.4375	22.1566	2.8175	215.11	0.0135	0.009	0.023	0.0035	42.6796		13. alveolus													13. alveolus		26.395	87.6557	6.415	342.133	1.79654	1.7314	26.395	355.005	6.415	351.467	0.01875	0.004	0.064	0.00525	137.643
		13 alveolus replacement		2.0675	21.4449	1.1075	72.2283	0.0211129	0.0199655	2.0675	21.4449	1.1075	78.141	0.0153333	0.008	0.028	0.00366667	14.7509		13 alveolus replacement												Dent	2. alveolus		32.575	31.006	4.625	210.227	1.98749	1.63247	32.575	255.947	4.625	218.182	0.022	0.012	0.038	0.005	61.6271
	Dent	2. alveolus		8.1275	11.25	2.3875	298.438	0.0319043	0.0578266	8.1275	11.25	2.3875	308.75	0.008	0.005	0.01	0.002	59.6875	Dent	2. alveolus													2. alveolus replacement		1.935	59.0818	1.175	90.3846	0.0516945	0.071856	1.935	65.0242	1.175	103.846	0.013	0.005	0.023	0.00366667	36.5484
		2. alveolus replacement					85.5	0.00426153	0.0123584	1.7175	10.2	0.4275	102	0.005	0.003	0.007	0.002	24.4286		2. alveolus replacement													4. alveolus		43.715	32.5495	12.865	796.947	1.21227	1.357	43.715	711.946	12.865	807.788	0.0161429	0.006	0.041	0.00428571	302.873
		4. alveolus		11.1275	20.4286	2.6575	189.821	0.106072	0.10986	11.1275	20.4286	2.6575	195.714	0.014	0.006	0.031	0.007	63.2738		4. alveolus													4. alveolus replacement		28.655	38.6164	4.565	243.467	1.93042	1.86043	28.655	252.626	4.565	252.8	0.01875	0.009	0.03	0.004	68.1956
		11. alveolus		5.5675	48.2875	1.6675	145	0.0287243	0.0362176	5.5675	48.2875	1.6675	155.208	0.0115	0.007	0.02	0.00275	29.4579		11. alveolus													11. alveolus		25.985	43.3449	5.025	296.65	0.999305	1.06603	25.985	278.082	5.025	306.982	0.0169391	0.006	0.037	0.00405435	96.8886
		11. alveolus replacement					14.2429	0.00423224	0.00266885	0.7575	15.6957	0.3275	17.8308	0.0229939	0.033	0.079	0.015	3.50235		11. alveolus replacement													12. alveolus		36.585	41.8699	9.475	551.942	1.68758	1.77641	36.585	524.344	9.475	562.136	0.0171667	0.009	0.039	0.0055	262.81
		12. alveolus		8.5575	33.3814	2.7975	195.174	0.0707408	0.0715634	8.5575	33.3814	2.7975	205.042	0.0143333	0.007	0.031	0.004	43.6479		12. alveolus													15. alveolus		28.035	30.2167	6.975	422.727	1.63527	1.79089	28.035	385.995	6.975	433.333	0.0165	0.007	0.028	0.00466667	159.065
		18. alveolus		6.1175	32.1153	2.4875	171.552	0.0451733	0.0451733	6.1175	32.1153	2.4875	187.037	0.0145	0.005	0.034	0.00375	36.7134		18. alveolus													15 alveolus replacement		8.865	17.0385	3.475	133.654	0.681487	0.473638	8.865	192.306	3.475	140.385	0.026	0.014	0.047	0.008	59.4017
		19. alveolus		6.0475	48.2161	2.5875	274.432	0.0302812	0.0465688	6.0475	48.2161	2.5875	287.613	0.00942857	0.005	0.019	0.00271429	58.8642		19. alveolus													16. alveolus		26.125	38.3306	5.265	224.043	2.54405	1.95623	26.125	291.364	5.265	231.489	0.0235	0.012	0.046	0.0065	84.9276
		19. alveolus replacement					21.5625	0.0156182	0.00943601	0.9075	33.7083	0.5175	25	0.024	0.015	0.034	0.004	3.05675		19. alveolus replacement																								average	0.0180702			40 CA measurements
													average	0.0162327			9 CA measurements																Large sized Alligator, right premaxilla					Large sized Alligator, right maxilla
																																	1	2	3	4	5	6	7	8	9	10	11	12	13	14	15	16	17
		Medium sized Alligator, right premaxilla					Medium sized Alligator, right maxilla																										408.795	583.696	1041.36		785.909	655	107.727	495.909	1087.61	514.957	756.429	346.904	347.207		555.053	364.628	228.382
		1	2	3	4	5	6	7	8	9	10	11	12	13	14	15	16	17	18	19	20	alveolus												227.899	435.909		269.545	355.909					205.5	89.25	47.75		224.734	76.3298	85.4412
		97.9	138.746	189.55	163.183	168.226	167.685	226.849	189.55	229.348	245	288.478	231.75	202.778	170.185	241.296	170.185	274.318	208.704	162.778	227.222	tooth formation time 1																52.2727
		36.7	59.0032	42.2607	59.0032	88.5852	43.5691	129.1	66.9355	42.3913	80.6522	36.6892	43.5185	95.3704	41.2963	91.6667	18.3333	74.3182	72.2283	30.9259	30.9259	tooth formation time 2												355.797	605.455		516.364	299.091					550.929	257.654	299.457		330.319	288.298	142.941
						7.55627		21.0611				1.36905										tooth formation time 3																303.636
		61.2	79.7428	147.289	104.18	79.6406	124.116	97.7492	122.614	186.957	164.348	251.789	188.231	107.407	128.889	149.63	151.852	200	136.475	131.852	196.296	replacement rate f-r1												355.797	605.455		258.182	301.364					275.464	257.654	299.457		330.319	288.298	142.941
						81.0289		108.039				35.3201										replacement rate r1-r2		Average of average relacement rates								Based on incremental line width of tooth		Pmx 1 0.0138	Pmx 3 replacement 0.011		Pmx 3 replacement 0.011	Pmx 3 replacement 0.011	Pmx 3 replacement 0.011	Pmx 3 replacement 0.011	Mx 6 0.0117	Mx 6 0.0117			Mx 7 0.0179 Mx 7 replacement 0.02		Mx 13 0.0188	Mx 13 0.0188	Mx 12 0.034
		61.2	79.7428	147.289	104.18	80.3348	124.116	102.894	122.614	186.957	164.348	143.555	188.231	107.407	128.889	149.63	151.852	200	136.475	131.852	196.296	replacement rate (average)		135.393										Tooth formation time based on mean incremental line width of a different tooth
																																Version using the same incremental line width for all values				0.0180702
																																	Large sized Alligator, right premaxilla					Large sized Alligator, right maxilla
	Version using the same incremental line width for all values				0.0145																												1	2	3	4	5	6	7	8	9	10	11	12	13	14	15	16	17
		Medium sized Alligator, right premaxilla					Medium sized Alligator, right maxilla																										408.795	445.762	1041.36		478.412	398.723	65.5776	301.879	704.199	333.422	756.429	346.904	343.937		577.471	379.354	228.382
		1	2	3	4	5	6	7	8	9	10	11	12	13	14	15	16	17	18	19	20	alveolus												174.044	265.354		164.082	216.655					205.5	89.25	52.8495		233.811	79.4126	160.762
		168.793	148.793	203.276	175	179.828	179.828	203.276	203.276	181.897	194.31	228.793	159.828	188.793	158.448	224.655	158.448	208.103	194.31	151.552	211.552	tooth formation time 1																31.8204
		43.2759	63.2759	71.5517	63.2759	95	46.7241	138.448	71.5517	52.931	63.9655	93.6207	40.5172	88.7931	38.4483	85.3448	17.069	56.3793	76.3793	28.7931	28.7931	tooth formation time 2												271.718	776.009		314.33	182.068					550.929	257.654	291.087		343.66	299.942	67.6203
						8.10345		22.5862				3.96552										tooth formation time 3															164.082	184.835
		125.517	85.5172	131.724	111.724	84.8276	133.103	64.8276	131.724	128.966	130.345	135.172	119.31	100	120	139.31	141.379	151.724	117.931	122.759	182.759	replacement rate f-r1												271.718	776.009		239.206	183.451					550.929	257.654	291.087		343.66	299.942	67.6203
						86.8966		115.862				89.6552										replacement rate r1-r2		Average of average relacement rates
		125.517	85.5172	131.724	111.724	85.8621	133.103	90.3448	131.724	128.966	130.345	112.414	119.31	100	120	139.31	141.379	151.724	117.931	122.759	182.759	replacement rate (average)		123.121
																																	Large sized Alligator, right dentary
																																	1	2	3	4	5	6	7	8	9	10	11	12	13	14	15	16	17
		Medium sized Alligator, right dentary																																210.227		796.947	461.18	345.652	272.36	261.801	329.29	269.527	296.65	551.942	696.221	447.965	422.727	224.043
		1	2	3	4	5	6	7	8	9	10	11	12	13	14	15	16	17	18	19	20	alveolus												90.3846		243.467	133.245	165.691	69.6809	109.043	199.112	91.4201		136.337	228.198		133.654	43.7778
		151.25	298.438	225.536	195.714	160.714	142.857	132.143	205.217	90.4348	207.826	155.208	205.042	153.488	191.163	219.07	154.483	154.483	187.037	287.613	275.758	tooth formation time 1														84.8404					25.1479
			85.5	105.536	54.8214	67.6786	33.5714	80.7143	59.1304	21.7391	65.2174	17.8308	55.232	88.6047	62.7907	101.163	2.24	55.8621	97.2414	25	46.25	tooth formation time 2												119.843		553.48	327.935	179.961	202.679	152.759	130.178	178.107		415.605	468.023		289.073	180.265
				7.67857																		tooth formation time 3														158.626					173.964
			212.938	120	140.893	93.0357	109.286	51.4286	146.087	68.6957	142.609	137.378	149.81	64.8837	128.372	117.907	152.243	98.6207	89.7952	262.613	229.508	replacement rate f-r1												119.843		356.053	327.935	179.961	202.679	152.759	152.071	178.107		415.605	468.023		289.073	180.265
				97.8571																		replacement rate r1-r2		Average of average relacement rates
			212.938	108.929	140.893	93.0357	109.286	51.4286	146.087	68.6957	142.609	137.378	149.81	64.8837	128.372	117.907	152.243	98.6207	89.7952	262.613	229.508	replacement rate (average)		131.844
																																Version using the same incremental line width for all values				0.0180702
																																	Large sized Alligator, right dentary
	Version using the same incremental line width for all values				0.0145																												1	2	3	4	5	6	7	8	9	10	11	12	13	14	15	16	17
		Medium sized Alligator, right dentary																																210.227		796.947	410.898	307.966	242.665	233.257	307.966	252.073	296.65	551.942	662.694	426.393	422.727	224.043
		1	2	3	4	5	6	7	8	9	10	11	12	13	14	15	16	17	18	19	20	alveolus												90.3846		243.467	138.626	172.383	62.8107	103.762	186.218	85.5		129.772	217.209		133.654	54.5097
		146.034	164.655	217.759	183.276	149.483	132.241	121.897	157.069	66.0345	159.138	115	192.931	146.034	183.276	210.862	148.793	190.172	171.552	178.448	173.621	tooth formation time 1														88.267					23.5194
			29.4828	101.897	52.931	65.3448	26.7241	72.2414	41.2069	11.5517	46.0345	22.5862	81.8966	13.6207	56.3793	94.3103	27.4138	50.1724	91.5517	35.6897	70.8621	tooth formation time 2												119.843		553.48	272.272	135.582	179.854	129.495	121.748	166.573		422.17	445.485		289.073	169.533
				7.41379																		tooth formation time 3														155.2
			135.172	115.862	130.345	84.1379	105.517	49.6552	115.862	54.4828	113.103	92.4138	111.034	132.414	126.897	116.552	121.379	140	80	142.759	102.759	replacement rate f-r1												119.843		354.34	272.272	135.582	179.854	129.495	121.748	166.573		422.17	445.485		289.073	169.533
				94.4828																		replacement rate r1-r2		Average of average relacement rates
			135.172	105.172	130.345	84.1379	105.517	49.6552	115.862	54.4828	113.103	92.4138	111.034	132.414	126.897	116.552	121.379	140	80	142.759	102.759	replacement rate (average)		108.403
	Measurements of teeth in log
	Premaxilla				dext																Premaxilla				dext																Premaxilla				dext
	Medium Alligator	Functional tooth						Tooth position 1 (labial)						Tooth position 2							Large Alligator	Functional tooth						Tooth position 1 (labial)						Tooth position 2							Small Alligator	Functional tooth						Tooth position 1 (labial)
		tooth height	crown height	volume	developmental stage	size compared to tooth befoe	estimated age	tooth height	crown height	volume	developmental stage	size compared to tooth before	estimated age	tooth height	crown height		developmental stage	size compared to tooth befoe	estimated age			tooth height	crown height	volume	developmental stage	size compared to tooth befoe		tooth height	crown height	volume	developmental stage	size compared to tooth befoe		tooth height	crown height	volume	developmental stage	size compared to tooth before				tooth height	crown height	volume	developmental stage	size compared to tooth befoe	estimated age	tooth height	crown height
	1. alveolus	0.756446	0.388723	0.358264			1.48513	0.106361	-0.202386	-0.6629		0.140606									1. alveolus	1.43545	0.752433	2.46261																	1. alveolus	0.50553	0.156186	-0.201332				-0.597223	-0.788346
	2. alveolus	0.709906	0.333951	0.489058				0.339948	-0.0373939	-0.162775		0.478864									2. alveolus	1.3667	0.906066	2.39635				0.90064	0.497621	1.44836		-0.466063									2. alveolus	0.403601	0.24866	-0.429708				0.061754	-0.111933
	3. alveolus	0.955567	0.469454	1.08668			1.5292	0.479647	0.0159881	0.204934		0.50195	1.63455								3. alveolus	1.59123	1.059	3.00563				1.12597	0.680789	1.97393		-0.465263									3. alveolus	0.692212	0.253532	0.175618			-1.77815	0.0223459	-0.273436
	4. alveolus	1.05757	0.404406	1.32986				0.355547	-0.0373939	-0.063019		0.336192									4. alveolus																				4. alveolus	0.616244	0.156186	0.120598				-0.273436	-0.504733
	5.alveolus	0.893068	0.416224	0.864632				0.451403	0.139092	0.0784532		0.505452		-0.423083	-0.929962	-1.82122		-0.937263			5.alveolus	1.57536	0.936765	2.93217				0.813247	0.472025	1.4476		-0.762114									5.alveolus	0.662078	0.246203	0.0831542				-0.00313823	-0.249646
											average	0.392613					average														average	-0.56448					average
																																									Maxilla				dext
	Maxilla				dext																Maxilla				dext																Small Alligator	Functional tooth						Tooth position 1 (labial)
	Medium Alligator	Functional tooth						Tooth position 1 (labial)						Tooth position 2							Large Alligator	Functional tooth						Tooth position 1 (labial)						Tooth position 2								tooth height	crown height	volume	developmental stage	size compared to tooth befoe	estimated age	tooth height	crown height
		tooth height	crown height	volume	developmental stage	size compared to tooth before	estimated age	tooth height	crown height	volume	developmental stage	size compared to tooth before	estimated age	tooth height	crown height	volume	developmental stage	size compared to tooth before	estimated age			tooth height	crown height	volume	developmental stage	size compared to tooth befoe		tooth height	crown height	volume	developmental stage	size compared to tooth befoe		tooth height	crown height	volume	developmental stage	size compared to tooth before			1. alveolus	0.658279	0.228606	0.0518246				-0.159392	-0.325323
	1. alveolus	0.903497	0.416224	0.889282				0.302656	-0.169091	-0.259919		0.334982									1. alveolus	1.43144	0.857634	2.63461				0.953518	0.592732	1.64137		-0.477926		-0.048177	-0.240332	-0.34738		-1.0017			2. alveolus	0.625601	0.386106	0.186884				0.255948	-0.0209983
	2. alveolus	0.862579	0.547467	0.881745				0.763241	0.302656	0.72744		0.884836		0.00324505	-0.484789	-0.797378		0.00425168			2. alveolus	1.31859	0.0737184	0.313005																	3. alveolus	0.800909	0.253532	0.446301				0.0424968	-0.219827
	3. alveolus	1.08982	0.469454	1.4796				0.5195	0.0159881	0.310861		0.476685									3. alveolus	1.62752	0.736795	3.10583																	4. alveolus	0.690444	0.400158	0.474021				0.447592	0.0873554
	4. alveolus	0.999457	0.421192	1.27205				0.214181	-0.312025	-0.329348		0.214298									4. alveolus	1.79585	1.10466	3.69968																	5. alveolus	0.768845	0.263115	0.482743				-0.0492458	-0.298605
	5. alveolus	1.04873	0.449864	1.35761				0.383366	-0.0326861	-0.0144209		0.365552									5. alveolus	1.5466	0.779957	2.92406																	6. alveolus	0.606682	0.340999	0.150789			-1.89734	0.265478	-0.0302115
	6. alveolus	0.983964	0.520811	1.21742			1.38178	0.495197	0.13274	0.330651		0.503268	1.46736	-0.512155	-1.24033	-1.77573		-1.03424			6. alveolus	1.50085	0.945715	2.87428				0.87303	0.312812	1.73629		-0.627824									7. alveolus	0.607755	0.314457	0.119301			-1.81436	-0.147032	-0.373865
	7. alveolus	0.916322	0.36502	0.964746			1.59329	0.0925452	-0.230992	-0.508109		0.100996									7. alveolus	1.45462	0.794139	2.71392				0.477844	0.251638	0.715966		-0.976772									8. alveolus	0.491754	0.322798	0.0909078				0.324858	0.0264515
	8. alveolus	0.957488	0.437354	1.17119				0.442088	0.109747	0.250137		0.461716									8. alveolus	1.49686	0.793441	2.82328				0.091667	-0.0199966	0.129519		-1.40519									9. alveolus	0.677862	0.358468	0.305766				0.00121433	-0.212681
	9. alveolus	0.947801	0.361256	1.08126				0.106361	-0.253755	-0.497233		0.112219									9. alveolus																				10. alveolus	0.594702	0.131234	0.271052				-0.334607	-0.548521
	10. alveolus	1.01315	0.512884	1.41526				0.460522	0.0925452	0.310861		0.454543									10. alveolus	1.62536	1.01849	3.29817				1.06465	0.625827	2.11821		-0.560719									11. alveolus	0.675118	0.362256	0.443168				0.143889	-0.12332
	11. alveolus	0.839321	0.361256	1.06637				-0.1093	-0.606425	-1.07533		-0.130224									11. alveolus	1.62567	0.836007	3.16421				0.337459	0.156852	0.806906		-1.28821									12. alveolus	0.659231	0.193903	0.372635			-1.92082	-0.440333	-0.692932
	12. alveolus	0.939394	0.479647	1.31641			1.48928	0.222066	-0.0875122	-0.0496059		0.236393									12. alveolus	1.50099	0.890141	3.00309				0.72632	0.463146	1.66324		-0.774671									13. alveolus	0.589145	0.312347	0.224777			-1.93305	-0.140982	-0.344094
	13. alveolus	0.871427	0.449864	1.13637			1.3455	0.315446	0.0443437	0.183256		0.361987	1.33132								13. alveolus	1.42152	0.807197	2.78863				0.343409	0.2266	0.829776		-1.07811									14. alveolus	0.508233	0.131234	0.0338774
	14. alveolus	0.790109	0.341929	0.900925				-0.1093	-0.379344	-0.83147		-0.138335									14. alveolus	1.32562	0.790637	2.63169																	15. alveolus	0.458305	0.243732	-0.117556				-0.477817	-0.477817
	15. alveolus	0.76174	0.486785	0.712778				0.206151	-0.379344	-0.202055		0.270632									15. alveolus	1.22904	0.658488	2.32145																	16. alveolus	0.061754	-0.165706	-0.871674
											average	0.300637						-0.514996													average	-0.798826						-1.0017
																																									Dentary				dext
	Dentary				dext																Dentary				dext																Small Alligator	Functional tooth						Tooth position 1 (labial)
	Medium Alligator	Functional tooth						Tooth position 1 (labial)						Tooth position 2							Large Alligator	Functional tooth						Tooth position 1 (labial)						Tooth position 2								tooth height	crown height	volume	developmental stage	size compared to tooth befoe	estimated age	tooth height	crown height
		tooth height	crown height	volume	developmental stage	size compared to tooth befoe	estimated age	tooth height	crown height	volume	developmental stage	size compared to tooth before	estimated age	tooth height	crown height	volume	developmental stage	size compared to tooth before	estimated age			tooth height	crown height	volume	developmental stage	size compared to tooth befoe		tooth height	crown height	volume	developmental stage	size compared to tooth befoe		tooth height	crown height	volume	developmental stage	size compared to tooth before			1. alveolus	0.712885	0.330982	0.37971				0.171083	-0.178618
	1. alveolus	0.97255	0.325823	1.16007				0.500717		0.17476		0.514849									1. alveolus																				2. alveolus	0.33702	0.210265	-0.166932			-1.87506	0.316557	-0.0847057
	2. alveolus	0.909957	0.377943	0.978703			1.05115	0.234897	-0.369064	-0.438468		0.25814	1.0086								2. alveolus	1.51288	0.665112	2.62099				0.286681	0.0700379	0.669539		-1.2262									3. alveolus	0.647657	0.265478	0.109955				0.0385407	-0.26536
	3. alveolus	0.930312	0.499343	0.875212				0.654898	0.169527	0.376604		0.703955		-0.28609	-0.968592	-1.41641		-0.436846			3. alveolus																				4. alveolus	0.574355	0.0908926	0.052182			-1.75696	-0.440333	-0.714893
	4. alveolus	1.0464	0.424473	1.30395			1.31024	0.355547	-0.114922	-0.070097		0.339782									4. alveolus	1.64063	1.10941	2.98503				1.4572	0.659441	2.67209		-0.18343		0.549616	0.202761	0.319397		-0.907584			5. alveolus	0.621467	0.196674	0.0446267				-0.198734	-0.491066
	5. alveolus	0.878952	0.335959	0.878145				0.315446	-0.0234208	-0.216377		0.358888									5. alveolus	1.47734	0.870696	2.66463				0.763802	0.398808	1.05874		-0.713536									6. alveolus	0.51092	0.283934	-0.108082				-0.0209983	-0.249646
	6. alveolus	0.826561	0.282735	0.653644				-0.0567529	-0.411728	-0.908907		-0.0686615									6. alveolus	1.38587	0.745465	2.42775				0.794139	0.493458	1.06806		-0.591735									7. alveolus	0.504172	0.0345482	-0.250799				-0.762456	-0.762456
	7. alveolus	0.718294	0.247359	0.601981				0.343901	0.020154	-0.106248		0.478774									7. alveolus	1.32623	0.64197	2.22638				0.304275	0.0549959	0.0769691		-1.02196									8. alveolus	0.483273	0.231164	-0.297801				-0.0209983	-0.344094
	8. alveolus	0.779416	0.357458	0.644477				0.0597527	-0.223662	-0.622973		0.0766634									8. alveolus	1.30201	0.624798	2.26634				0.549616	0.273001	0.738547		-0.75239									9. alveolus	0.491754	0.0464171	-0.321199				-0.788346	-0.788346
	9. alveolus	0.652971	-0.0188612	0.449347				-0.541362	-0.775985	-1.75011		-0.829075									9. alveolus	1.26162	0.745465	2.21702				0.86835	0.526985	1.39971		-0.393269		-0.232844	-0.371611	-0.751395		-1.10119			10. alveolus	0.502809	0.25835	-0.236892				-0.140982	-0.334607
	10. alveolus	0.764736	0.363142	0.658871				0.145352	-0.175549	-0.457878		0.190068									10. alveolus	1.32869	0.658488	2.26462				0.398808	0.188928	0.470319		-0.929878									11. alveolus	0.589145	0.174002	-0.0242485				-0.344094	-0.548521
	11. alveolus	0.74566	0.222066	0.619617			1.68383	-0.120617	-0.484789	-1.21983		-0.161759	1.19578								11. alveolus	1.41472	0.701136	2.47194																	12. alveolus	0.551791	0.32895	0.0843799			-1.84164	0.207581	-0.0348924
	12. alveolus	0.932347	0.44677	1.14009			1.5235	0.41288	0.0746336	0.162322		0.44284									12. alveolus	1.5633	0.976579	2.96916				0.728759	0.370143	1.21283		-0.834544									13. alveolus	0.731814	0.25835	0.375676				-0.0953926	-0.344094
	13. alveolus	0.878378	0.325823	0.967997				-0.246034	-0.704433	-1.15719		-0.2801									13. alveolus	1.65345	1.07828	3.36271				1.11544	0.59384	2.11671		-0.53801									14. alveolus	0.615192	0.358468	0.247557				0.228606	-0.0794593
	14. alveolus	0.936891	0.424473	1.25165				0.208844	-0.0875122	-0.125142		0.222912									14. alveolus	1.58223	0.886773	3.12457																	15. alveolus	0.628675	0.196674	0.216966				-0.518844	-0.633017
	15. alveolus	0.860188	0.485366	1.05512				0.419543	0.135927	0.400438		0.487734									15. alveolus	1.4477	0.843544	2.83965				0.947679	0.540955	1.95944		-0.500022									16. alveolus	0.569702	0.310226	0.172557				-0.0742755	-0.273436
	16. alveolus	0.772138	0.333951	0.985009				-0.209363	-0.400663	-0.920139		-0.271147									16. alveolus	1.41706	0.721398	2.75586				0.171726	-0.00656377	0.424321		-1.24533									17. alveolus	0.52411	0.150081	0.088988				-0.815877	-0.815877
	17. alveolus	0.810736	0.440516	1.04995				0.0746336	-0.138167	-0.267893		0.0920566									17. alveolus																				18. alveolus	0.529276	0.270166	0.0791091			-1.83863	-0.165706	-0.363713
	18. alveolus	0.786574	0.395763	0.889276			1.50671	0.432568	0.123035	0.361144		0.54994									18. alveolus																				19. alveolus	0.541929	0.215585	0.00797391			-1.90309	-0.947691	-0.947691
	19. alveolus	0.781576	0.41288	0.919607			1.68319	-0.0421534	-0.28609	-0.472669		-0.0539338	1.52774								19. alveolus																				20. alveolus	0.452216	0.452216	-0.180717				-0.373865	-0.518844
	20. alveolus	0.735399	0.400969	0.682248				0.211521	0.0117818	0.0309719		0.287627									20. alveolus
	average	0.875435	0.392943	0.968912							average	0.166978																			average	-0.744192						-1.00439			average	0.579106	0.235497	0.0727244
																					average	1.47447	0.812825	2.69654
		tooth height vs volume		crown height vs volume				Replacement teeth 1		tooth height vs volume		crown height vs volume									Functional teeth		tooth height vs volume		crown height vs volume			Replacement teeth 1		tooth height vs volume		crown height vs volume									Functional teeth		tooth height vs volume		crown height vs volume			Replacement teeth 1
	R-square	p-value		R-square	p-value				R-square	p-value		R-square	p-value									R-square	p-value		R-square	p-value			R-square	p-value		R-square	p-value									R-square	p-value		R-square	p-value			R-square
	0.785312	2.90454e-14		0.317229	0.00015445				0.913616	8.31768e-22		0.899335	4.89715e-20									0.55668	1.44888e-06		0.787657	2.86534e-11			0.90042	5.20276e-13		0.818857	5.28719e-10									0.802638	2.54932e-15		0.328701	8.92392e-05			0.950078
				log									log
		tooth height	crown height	tooth height	crown height		ratio of tooth height to crown height				crown volume	crown volume [ccm]	crown volume [ccm]		Body length	Skull length
	1. alveolus	5.7075	2.4475	0.756446	0.388723		2.33197				1.06234	0.00106234	-2.97374		0.9	115.6
	2. alveolus	5.1275	2.1575	0.709906	0.333951		2.37659				1.40735	0.00140735	-2.8516		0.9	115.6
	3. alveolus	9.0275	2.9475	0.955567	0.469454		3.06277				3.5725	0.0035725	-2.44703		0.9	115.6
	4. alveolus	11.4175	2.5375	1.05757	0.404406		4.49951				2.76128	0.00276128	-2.55889		0.9	115.6
	5. alveolus	7.8175	2.6075	0.893068	0.416224		2.99808				2.72146	0.00272146	-2.5652		0.9	115.6
	1. alveolus	8.0075	2.6075	0.903497	0.416224		3.07095				1.98024	0.00198024	-2.70328		0.9	115.6
	2. alveolus	7.2875	3.5275	0.862579	0.547467		2.06591				5.13458	0.00513458	-2.2895		0.9	115.6
	3. alveolus	12.2975	2.9475	1.08982	0.469454		4.17218				4.05622	0.00405622	-2.39188		0.9	115.6
	4. alveolus	9.9875	2.6375	0.999457	0.421192		3.78673				3.39166	0.00339166	-2.46959		0.9	115.6
	5. alveolus	11.1875	2.8175	1.04873	0.449864		3.97072				3.33759	0.00333759	-2.47657		0.9	115.6
	6. alveolus	9.6375	3.3175	0.983964	0.520811		2.90505				5.21236	0.00521236	-2.28297		0.9	115.6
	7. alveolus	8.2475	2.3175	0.916322	0.36502		3.55879				2.51895	0.00251895	-2.59878		0.9	115.6
	8. alveolus	9.0675	2.7375	0.957488	0.437354		3.31233				4.09029	0.00409029	-2.38825		0.9	115.6
	9. alveolus	8.8675	2.2975	0.947801	0.361256		3.85963				3.23508	0.00323508	-2.49011		0.9	115.6
	10. alveolus	10.3075	3.2575	1.01315	0.512884		3.16424				6.77453	0.00677453	-2.16912		0.9	115.6
	11. alveolus	6.9075	2.2975	0.839321	0.361256		3.00653				4.04251	0.00404251	-2.39335		0.9	115.6
	12. alveolus	8.6975	3.0175	0.939394	0.479647		2.88235				6.90342	0.00690342	-2.16094		0.9	115.6
	13. alveolus	7.4375	2.8175	0.871427	0.449864		2.63975				6.13136	0.00613136	-2.21244		0.9	115.6
	14. alveolus	6.1675	2.1975	0.790109	0.341929		2.8066				2.97887	0.00297887	-2.52595		0.9	115.6
	15. alveolus	5.7775	3.0675	0.76174	0.486785		1.88346				3.10499	0.00310499	-2.50794		0.9	115.6
	1. alveolus	9.3875	2.1175	0.97255	0.325823		4.43329				2.79044	0.00279044	-2.55433		0.9	115.6
	2. alveolus	8.1275	2.3875	0.909957	0.377943		3.40419				2.15469	0.00215469	-2.66662		0.9	115.6
	3. alveolus	8.5175	3.1575	0.930312	0.499343		2.69755				2.96387	0.00296387	-2.52814		0.9	115.6
	4. alveolus	11.1275	2.6575	1.0464	0.424473		4.18721				2.56988	0.00256988	-2.59009		0.9	115.6
	5. alveolus	7.5675	2.1675	0.878952	0.335959		3.49135				2.13728	0.00213728	-2.67014		0.9	115.6
	6. alveolus	6.7075	1.9175	0.826561	0.282735		3.49804				1.07744	0.00107744	-2.96761		0.9	115.6
	7. alveolus	5.2275	1.7675	0.718294	0.247359		2.95757				1.26587	0.00126587	-2.89761		0.9	115.6
	8. alveolus	6.0175	2.2775	0.779416	0.357458		2.64215				1.5606	0.0015606	-2.80671		0.9	115.6
	9. alveolus	4.4975	0.9575	0.652971	-0.0188612		4.69713				0.940395	0.000940395	-3.02669		0.9	115.6
	10. alveolus	5.8175	2.3075	0.764736	0.363142		2.52113				1.84671	0.00184671	-2.7336		0.9	115.6
	11. alveolus	5.5675	1.6675	0.74566	0.222066		3.33883				1.33846	0.00133846	-2.87339		0.9	115.6
	12. alveolus	8.5575	2.7975	0.932347	0.44677		3.05898				4.04872	0.00404872	-2.39268		0.9	115.6
	13. alveolus	7.5575	2.1175	0.878378	0.325823		3.56907				2.39478	0.00239478	-2.62073		0.9	115.6
	14. alveolus	8.6475	2.6575	0.936891	0.424473		3.254				4.10316	0.00410316	-2.38688		0.9	115.6
	15. alveolus	7.2475	3.0575	0.860188	0.485366		2.3704				5.12291	0.00512291	-2.29048		0.9	115.6
	16. alveolus	5.9175	2.1575	0.772138	0.333951		2.74276				3.24592	0.00324592	-2.48866		0.9	115.6
	17. alveolus	6.4675	2.7575	0.810736	0.440516		2.34542				4.76096	0.00476096	-2.32231		0.9	115.6
	18. alveolus	6.1175	2.4875	0.786574	0.395763		2.4593				4.02149	0.00402149	-2.39561		0.9	115.6
	19. alveolus	6.0475	2.5875	0.781576	0.41288		2.3372				3.90529	0.00390529	-2.40835		0.9	115.6
	20. alveolus	5.4375	2.5175	0.735399	0.400969		2.15988	3.11299	functional teeth medium		2.74766	0.00274766	-2.56104		0.9	115.6
	1. alveolus	1.2775	0.6275	0.106361	-0.202386		2.03586				0.0927802	9.27802e-05	-4.03254		0.9	115.6
	2. alveolus	2.1875	0.9175	0.339948	-0.0373939		2.3842				0.243617	0.000243617	-3.61329		0.9	115.6
	3. alveolus	3.0175	1.0375	0.479647	0.0159881		2.90843				0.540662	0.000540662	-3.26707		0.9	115.6
	4. alveolus	2.2675	0.9175	0.355547	-0.0373939		2.47139				0.328897	0.000328897	-3.48294		0.9	115.6
	5. alveolus	2.8275	1.3775	0.451403	0.139092		2.05263				0.500013	0.000500013	-3.30102		0.9	115.6
	1. alveolus	2.0075	0.6775	0.302656	-0.169091		2.9631				0.271859	0.000271859	-3.56566		0.9	115.6
	2. alveolus	5.7975	2.0075	0.763241	0.302656		2.88792				1.74792	0.00174792	-2.75748		0.9	115.6
	3. alveolus	3.3075	1.0375	0.5195	0.0159881		3.18795				0.752705	0.000752705	-3.12338		0.9	115.6
	4. alveolus	1.6375	0.4875	0.214181	-0.312025		3.35897				0.252692	0.000252692	-3.59741		0.9	115.6
	5. alveolus	2.4175	0.9275	0.383366	-0.0326861		2.60647				0.423437	0.000423437	-3.37321		0.9	115.6
	6. alveolus	3.1275	1.3575	0.495197	0.13274		2.30387				0.917246	0.000917246	-3.03751		0.9	115.6
	7. alveolus	1.2375	0.5875	0.0925452	-0.230992		2.10638				0.152967	0.000152967	-3.8154		0.9	115.6
	8. alveolus	2.7675	1.2875	0.442088	0.109747		2.14951				0.798539	0.000798539	-3.0977		0.9	115.6
	9. alveolus	1.2775	0.5575	0.106361	-0.253755		2.29148				0.144448	0.000144448	-3.84029		0.9	115.6
	10. alveolus	2.8875	1.2375	0.460522	0.0925452		2.33333				0.927154	0.000927154	-3.03285		0.9	115.6
	11. alveolus	0.7775	0.2475	-0.1093	-0.606425		3.14141				0.0283341	2.83341e-05	-4.54769		0.9	115.6
	12. alveolus	1.6675	0.8175	0.222066	-0.0875122		2.03976				0.480661	0.000480661	-3.31816		0.9	115.6
	13. alveolus	2.0675	1.1075	0.315446	0.0443437		1.86682				0.891134	0.000891134	-3.05006		0.9	115.6
	14. alveolus	0.7775	0.4175	-0.1093	-0.379344		1.86228				0.081391	8.1391e-05	-4.08942		0.9	115.6
	15. alveolus	1.6075	0.4175	0.206151	-0.379344		3.8503				0.440197	0.000440197	-3.35635		0.9	115.6
	1. alveolus	3.1675		0.500717							0.45103	0.00045103	-3.34579		0.9	115.6
	2. alveolus	1.7175	0.4275	0.234897	-0.369064		4.01754				0.127318	0.000127318	-3.89511		0.9	115.6
	3. alveolus	4.5175	1.4775	0.654898	0.169527		3.05753				0.813817	0.000813817	-3.08947		0.9	115.6
	4. alveolus	2.2675	0.7675	0.355547	-0.114922		2.9544				0.295934	0.000295934	-3.52881		0.9	115.6
	5. alveolus	2.0675	0.9475	0.315446	-0.0234208		2.18206				0.251951	0.000251951	-3.59868		0.9	115.6
	6. alveolus	0.8775	0.3875	-0.0567529	-0.411728		2.26452				0.0539829	5.39829e-05	-4.26774		0.9	115.6
	7. alveolus	2.2075	1.0475	0.343901	0.020154		2.1074				0.355287	0.000355287	-3.44942		0.9	115.6
	8. alveolus	1.1475	0.5975	0.0597527	-0.223662		1.9205				0.0951876	9.51876e-05	-4.02142		0.9	115.6
	9. alveolus	0.2875	0.1675	-0.541362	-0.775985		1.71642				0.00750019	7.50019e-06	-5.12493		0.9	115.6
	10. alveolus	1.3975	0.6675	0.145352	-0.175549		2.09363				0.152134	0.000152134	-3.81777		0.9	115.6
	11. alveolus	0.7575	0.3275	-0.120617	-0.484789		2.31298				0.034075	3.4075e-05	-4.46756		0.9	115.6
	12. alveolus	2.5875	1.1875	0.41288	0.0746336		2.17895				0.587145	0.000587145	-3.23125		0.9	115.6
	13. alveolus	0.5675	0.1975	-0.246034	-0.704433		2.87342				0.0233339	2.33339e-05	-4.63201		0.9	115.6
	14. alveolus	1.6175	0.8175	0.208844	-0.0875122		1.97859				0.323805	0.000323805	-3.48972		0.9	115.6
	15. alveolus	2.6275	1.3675	0.419543	0.135927		1.92139				1.21549	0.00121549	-2.91525		0.9	115.6
	16. alveolus	0.6175	0.3975	-0.209363	-0.400663		1.55346				0.0609275	6.09275e-05	-4.21519		0.9	115.6
	17. alveolus	1.1875	0.7275	0.0746336	-0.138167		1.6323				0.330286	0.000330286	-3.48111		0.9	115.6
	18. alveolus	2.7075	1.3275	0.432568	0.123035		2.03955				1.32698	0.00132698	-2.87714		0.9	115.6
	19. alveolus	0.9075	0.5175	-0.0421534	-0.28609		1.75362				0.207413	0.000207413	-3.68316		0.9	115.6
	20. alveolus	1.6275	1.0275	0.211521	0.0117818		1.58394	2.38319	1st replacement teeth of medium		0.767983	0.000767983	-3.11465		0.9	115.6
	2nd replacement	0.3775	0.1175	-0.423083	-0.929962		3.21277				0.00435196	4.35196e-06	-5.36131		0.9	115.6
	2nd replacement	1.0075	0.3275	0.00324505	-0.484789		3.07634				0.0611127	6.11127e-05	-4.21387		0.9	115.6
	2nd replacement	0.3075	0.0575	-0.512155	-1.24033		5.34783				0.00574089	5.74089e-06	-5.24102		0.9	115.6
	2nd replacement	0.5175	0.1075	-0.28609	-0.968592		4.81395	2.81825	All teeth of medium		0.0211117	2.11117e-05	-4.67548		0.9	115.6
	1. alveolus	27.255	5.655	1.43545	0.752433		4.81963				30.5144	0.0305144	-1.5155		3.95	428		0.484355
	2. alveolus	23.265	8.055	1.3667	0.906066		2.88827				74.0453	0.0740453	-1.1305		3.95	428		1.17532
	3. alveolus	39.015	11.455	1.59123	1.059		3.40594				228.075	0.228075	-0.641923		3.95	428		3.62023
	5. alveolus	37.615	8.645	1.57536	0.936765		4.35107				118.481	0.118481	-0.92635		3.95	428		1.88065
	1. alveolus	27.005	7.205	1.43144	0.857634		3.74809				99.4408	0.0994408	-1.00244		3.95	428		1.57843
	2. alveolus	20.825	1.185	1.31859	0.0737184		17.5738				1.08933	0.00108933	-2.96284		3.95	428		0.017291
	3. alveolus	42.415	5.455	1.62752	0.736795		7.77544				125.27	0.12527	-0.902152		3.95	428		1.98842
	4. alveolus	62.495	12.725	1.79585	1.10466		4.9112				649.748	0.649748	-0.187255		3.95	428		10.3135
	5. alveolus	35.205	6.025	1.5466	0.779957		5.84315				111.494	0.111494	-0.952747		3.95	428		1.76975
	6. alveolus	31.685	8.825	1.50085	0.945715		3.59037				175.933	0.175933	-0.754652		3.95	428		2.79259
	7. alveolus	28.485	6.225	1.45462	0.794139		4.5759				100.273	0.100273	-0.998814		3.95	428		1.59164
	8. alveolus	31.395	6.215	1.49686	0.793441		5.05149				113.512	0.113512	-0.94496		3.95	428		1.80177
Functional teeth	10. alveolus	42.205	10.435	1.62536	1.01849		4.04456				394.317	0.394317	-0.404154		3.95	428		6.25901
	11. alveolus	42.235	6.855	1.62567	0.836007		6.1612				180.215	0.180215	-0.744209		3.95	428		2.86056
	12. alveolus	31.695	7.765	1.50099	0.890141		4.08178				212.296	0.212296	-0.673058		3.95	428		3.36978
	13. alveolus	26.395	6.415	1.42152	0.807197		4.11458				125.809	0.125809	-0.900289		3.95	428		1.99696
	14. alveolus	21.165	6.175	1.32562	0.790637		3.42753				116.109	0.116109	-0.935136		3.95	428		1.84299
	15. alveolus	16.945	4.555	1.22904	0.658488		3.72009				55.1325	0.0551325	-1.25859		3.95	428		0.875119
	2. alveolus	32.575	4.625	1.51288	0.665112		7.04324				47.8892	0.0478892	-1.31976		3.95	428		0.760147
	4. alveolus	43.715	12.865	1.64063	1.10941		3.39798				357.187	0.357187	-0.447104		3.95	428		5.66963
	5. alveolus	30.015	7.425	1.47734	0.870696		4.04242				86.2946	0.0862946	-1.06402		3.95	428		1.36976
	6. alveolus	24.315	5.565	1.38587	0.745465		4.36927				51.4723	0.0514723	-1.28843		3.95	428		0.817021
	7. alveolus	21.195	4.385	1.32623	0.64197		4.83352				26.4542	0.0264542	-1.57751		3.95	428		0.419907
	8. alveolus	20.045	4.215	1.30201	0.624798		4.75563				35.1246	0.0351246	-1.45439		3.95	428		0.557534
	9. alveolus	18.265	5.565	1.26162	0.745465		3.28212				47.5152	0.0475152	-1.32317		3.95	428		0.754209
	10. alveolus	21.315	4.555	1.32869	0.658488		4.67947				34.6117	0.0346117	-1.46078		3.95	428		0.549392
	11. alveolus	25.985	5.025	1.41472	0.701136		5.17114				47.9109	0.0479109	-1.31957		3.95	428		0.76049
	12. alveolus	36.585	9.475	1.5633	0.976579		3.86121				198.082	0.198082	-0.703154		3.95	428		3.14416
	13. alveolus	45.025	11.975	1.65345	1.07828		3.75992				477.435	0.477435	-0.321086		3.95	428		7.57833
	14. alveolus	38.215	7.705	1.58223	0.886773		4.95977				157.094	0.157094	-0.80384		3.95	428		2.49356
	15. alveolus	28.035	6.975	1.4477	0.843544		4.01935				164.407	0.164407	-0.784081		3.95	428		2.60963
	16. alveolus	26.125	5.265	1.41706	0.721398		4.96201	4.91316	functional teeth large		104.784	0.104784	-0.979705		3.95	428		1.66324
	2. alveolus	7.955	3.145	0.90064	0.497621		2.52941				10.672	0.010672	-1.97176		3.95	428
	3. alveolus	13.365	4.795	1.12597	0.680789		2.78728				31.7039	0.0317039	-1.49889		3.95	428
	5. alveolus	6.505	2.965	0.813247	0.472025		2.19393				13.8648	0.0138648	-1.85809		3.95	428
	1. alveolus	8.985	3.915	0.953518	0.592732		2.29502				19.6946	0.0196946	-1.70565		3.95	428
	6. alveolus	7.465	2.055	0.87303	0.312812		3.6326				18.7696	0.0187696	-1.72654		3.95	428
	7. alveolus	3.005	1.785	0.477844	0.251638		1.68347				2.66713	0.00266713	-2.57396		3.95	428
	8. alveolus	1.235	0.955	0.091667	-0.0199966		1.29319				0.849582	0.000849582	-3.07079		3.95	428
	10. alveolus	11.605	4.225	1.06465	0.625827		2.74675				45.3623	0.0453623	-1.34331		3.95	428
	11. alveolus	2.175	1.435	0.337459	0.156852		1.51568				3.0602	0.0030602	-2.51425		3.95	428
	12. alveolus	5.325	2.905	0.72632	0.463146		1.83305				25.844	0.025844	-1.58764		3.95	428
	13. alveolus	2.205	1.685	0.343409	0.2266		1.30861				5.04692	0.00504692	-2.29697		3.95	428
	2. alveolus	1.935	1.175	0.286681	0.0700379		1.64681				2.67726	0.00267726	-2.57231		3.95	428
	4. alveolus	28.655	4.565	1.4572	0.659441		6.27711				64.0818	0.0640818	-1.19327		3.95	428
	5. alveolus	5.805	2.505	0.763802	0.398808		2.31737				5.46832	0.00546832	-2.26215		3.95	428
	6. alveolus	6.225	3.115	0.794139	0.493458		1.99839				5.85732	0.00585732	-2.2323		3.95	428
	7. alveolus	2.015	1.135	0.304275	0.0549959		1.77533				0.675465	0.000675465	-3.1704		3.95	428
	8. alveolus	3.545	1.875	0.549616	0.273001		1.89067				2.63679	0.00263679	-2.57892		3.95	428
	9. alveolus	7.385	3.365	0.86835	0.526985		2.19465				10.5647	0.0105647	-1.97614		3.95	428
	10. alveolus	2.505	1.545	0.398808	0.188928		1.62136				1.57992	0.00157992	-2.80137		3.95	428
	12. alveolus	5.355	2.345	0.728759	0.370143		2.28358				8.73713	0.00873713	-2.05863		3.95	428
	13. alveolus	13.045	3.925	1.11544	0.59384		3.32357				48.1306	0.0481306	-1.31758		3.95	428
	15. alveolus	8.865	3.475	0.947679	0.540955		2.55108				42.6506	0.0426506	-1.37007		3.95	428
	16. alveolus	1.485	0.985	0.171726	-0.00656377		1.50761	2.31333	1st replacement teeth of large						3.95	428
	2nd replacement	0.895	0.575	-0.048177	-0.240332		1.55652				0.291239	0.000291239	-3.53575		3.95	428
	2nd replacement	3.545	1.595	0.549616	0.202761		2.22257				0.658911	0.000658911	-3.18117		3.95	428
	2nd replacement	0.585	0.425	-0.232844	-0.371611		1.37647	3.71695	All teeth of large		0.107596	0.000107596	-3.9682		3.95	428
	1. alveolus	3.2028	1.4328	0.50553	0.156186		2.23534				0.297447	0.000297447	-3.52659		0.37	57.73
	2. alveolus	2.5328	1.7728	0.403601	0.24866		1.4287				0.324124	0.000324124	-3.48929		0.37	57.73
	3. alveolus	4.9228	1.7928	0.692212	0.253532		2.74587				0.617797	0.000617797	-3.20915		0.37	57.73
	4. alveolus	4.1328	1.4328	0.616244	0.156186		2.88442				0.418518	0.000418518	-3.37829		0.37	57.73
	5. alveolus	4.5928	1.7628	0.662078	0.246203		2.6054				0.512112	0.000512112	-3.29064		0.37	57.73
	1. alveolus	4.5528	1.6928	0.658279	0.228606		2.68951				0.507186	0.000507186	-3.29483		0.37	57.73
	2. alveolus	4.2228	2.4328	0.625601	0.386106		1.73578				0.958523	0.000958523	-3.0184		0.37	57.73
	3. alveolus	6.3228	1.7928	0.800909	0.253532		3.52677				0.673902	0.000673902	-3.1714		0.37	57.73
	4. alveolus	4.9028	2.5128	0.690444	0.400158		1.95113				1.5665	0.0015665	-2.80507		0.37	57.73
	5. alveolus	5.8728	1.8328	0.768845	0.263115		3.20428				0.80201	0.00080201	-3.09582		0.37	57.73
	6. alveolus	4.0428	2.1928	0.606682	0.340999		1.84367				0.935396	0.000935396	-3.029		0.37	57.73
	7. alveolus	4.0528	2.0628	0.607755	0.314457		1.96471				0.761483	0.000761483	-3.11834		0.37	57.73
	8. alveolus	3.1028	2.1028	0.491754	0.322798		1.47556				0.946144	0.000946144	-3.02404		0.37	57.73
	9. alveolus	4.7628	2.2828	0.677862	0.358468		2.08639				1.16493	0.00116493	-2.9337		0.37	57.73
	10. alveolus	3.9328	1.3528	0.594702	0.131234		2.90716				0.528585	0.000528585	-3.27688		0.37	57.73
	11. alveolus	4.7328	2.3028	0.675118	0.362256		2.05524				1.61736	0.00161736	-2.79119		0.37	57.73
	12. alveolus	4.5628	1.5628	0.659231	0.193903		2.91963				0.944224	0.000944224	-3.02492		0.37	57.73
	13. alveolus	3.8828	2.0528	0.589145	0.312347		1.89147				1.2259	0.0012259	-2.91154		0.37	57.73
	14. alveolus	3.2228	1.3528	0.508233	0.131234		2.38232				0.606762	0.000606762	-3.21698		0.37	57.73
	15. alveolus	2.8728	1.7528	0.458305	0.243732		1.63898				0.573143	0.000573143	-3.24174		0.37	57.73
	16. alveolus	1.1528	0.6828	0.061754	-0.165706		1.68834				0.111123	0.000111123	-3.9542		0.37	57.73
	1. alveolus	5.1628	2.1428	0.712885	0.330982		2.40937				1.01402	0.00101402	-2.99395		0.37	57.73
	2. alveolus	2.1728	1.6228	0.33702	0.210265		1.33892				0.545826	0.000545826	-3.26295		0.37	57.73
	3. alveolus	4.4428	1.8428	0.647657	0.265478		2.4109				0.60545	0.00060545	-3.21792		0.37	57.73
	4. alveolus	3.7528	1.2328	0.574355	0.0908926		3.04413				0.342613	0.000342613	-3.4652		0.37	57.73
	5. alveolus	4.1828	1.5728	0.621467	0.196674		2.65946				0.475359	0.000475359	-3.32298		0.37	57.73
	6. alveolus	3.2428	1.9228	0.51092	0.283934		1.6865				0.554303	0.000554303	-3.25625		0.37	57.73
	7. alveolus	3.1928	1.0828	0.504172	0.0345482		2.94865				0.214121	0.000214121	-3.66934		0.37	57.73
	8. alveolus	3.0428	1.7028	0.483273	0.231164		1.78694				0.376295	0.000376295	-3.42447		0.37	57.73
	9. alveolus	3.1028	1.1128	0.491754	0.0464171		2.78828				0.222278	0.000222278	-3.6531		0.37	57.73
	10. alveolus	3.1828	1.8128	0.502809	0.25835		1.75574				0.436942	0.000436942	-3.35958		0.37	57.73
	11. alveolus	3.8828	1.4928	0.589145	0.174002		2.60102				0.435695	0.000435695	-3.36082		0.37	57.73
	12. alveolus	3.5628	2.1328	0.551791	0.32895		1.67048				0.900082	0.000900082	-3.04572		0.37	57.73
	13. alveolus	5.3928	1.8128	0.731814	0.25835		2.97485				0.825169	0.000825169	-3.08346		0.37	57.73
	14. alveolus	4.1228	2.2828	0.615192	0.358468		1.80603				1.13282	0.00113282	-2.94584		0.37	57.73
	15. alveolus	4.2528	1.5728	0.628675	0.196674		2.70397				0.793694	0.000793694	-3.10035		0.37	57.73
	16. alveolus	3.7128	2.0428	0.569702	0.310226		1.81751				1.10285	0.00110285	-2.95748		0.37	57.73
	17. alveolus	3.3428	1.4128	0.52411	0.150081		2.36608				0.695365	0.000695365	-3.15779		0.37	57.73
	18. alveolus	3.3828	1.8628	0.529276	0.270166		1.81598				0.925672	0.000925672	-3.03354		0.37	57.73
	19. alveolus	3.4828	1.6428	0.541929	0.215585		2.12004				0.637661	0.000637661	-3.19541		0.37	57.73
	20. alveolus	2.8328	2.8328	0.452216	0.452216		1	2.2333	functional teeth small		0.467746	0.000467746	-3.32999		0.37	57.73
	1. alveolus	0.2528	0.1628	-0.597223	-0.788346		1.55283				0.00185525	1.85525e-06	-5.7316		0.37	57.73
	2. alveolus	1.1528	0.7728	0.061754	-0.111933		1.49172				0.0800955	8.00955e-05	-4.09639		0.37	57.73
	3. alveolus	1.0528	0.5328	0.0223459	-0.273436		1.97598				0.0460613	4.60613e-05	-4.33666		0.37	57.73
	4. alveolus	0.5328	0.3128	-0.273436	-0.504733		1.70332				0.0088604	8.8604e-06	-5.05255		0.37	57.73
	5. alveolus	0.9928	0.5628	-0.00313823	-0.249646		1.76404				0.036817	3.6817e-05	-4.43395		0.37	57.73
	1. alveolus	0.6928	0.4728	-0.159392	-0.325323		1.46531				0.0260374	2.60374e-05	-4.5844		0.37	57.73
	2. alveolus	1.8028	0.9528	0.255948	-0.0209983		1.89211				0.148676	0.000148676	-3.82776		0.37	57.73
	3. alveolus	1.1028	0.6028	0.0424968	-0.219827		1.82946				0.0562651	5.62651e-05	-4.24976		0.37	57.73
	4. alveolus	2.8028	1.2228	0.447592	0.0873554		2.29212				0.335	0.000335	-3.47496		0.37	57.73
	5. alveolus	0.8928	0.5028	-0.0492458	-0.298605		1.77566				0.032083	3.2083e-05	-4.49373		0.37	57.73
	6. alveolus	1.8428	0.9328	0.265478	-0.0302115		1.97556				0.156896	0.000156896	-3.80439		0.37	57.73
	7. alveolus	0.7128	0.4228	-0.147032	-0.373865		1.6859				0.0326587	3.26587e-05	-4.486		0.37	57.73
	8. alveolus	2.1128	1.0628	0.324858	0.0264515		1.98796				0.237951	0.000237951	-3.62351		0.37	57.73
	9. alveolus	1.0028	0.6128	0.00121433	-0.212681		1.63642				0.0649976	6.49976e-05	-4.1871		0.37	57.73
	10. alveolus	0.4628	0.2828	-0.334607	-0.548521		1.63649				0.0150979	1.50979e-05	-4.82108		0.37	57.73
	11. alveolus	1.3928	0.7528	0.143889	-0.12332		1.85016				0.17257	0.00017257	-3.76303		0.37	57.73
	12. alveolus	0.3628	0.2028	-0.440333	-0.692932		1.78895				0.00761291	7.61291e-06	-5.11845		0.37	57.73
	13. alveolus	0.7228	0.4528	-0.140982	-0.344094		1.59629				0.0709792	7.09792e-05	-4.14887		0.37	57.73
	14. alveolus		0.3328		-0.477817		0				0.00633343	6.33343e-06	-5.19836		0.37	57.73
	1. alveolus	1.4828	0.6628	0.171083	-0.178618		2.23718				0.081215	8.1215e-05	-4.09036		0.37	57.73
	2. alveolus	2.0728	0.8228	0.316557	-0.0847057		2.5192				0.209387	0.000209387	-3.67905		0.37	57.73
	3. alveolus	1.0928	0.5428	0.0385407	-0.26536		2.01326				0.0431825	4.31825e-05	-4.36469		0.37	57.73
	4. alveolus	0.3628	0.1928	-0.440333	-0.714893		1.88174				0.00463812	4.63812e-06	-5.33366		0.37	57.73
	5. alveolus	0.6328	0.3228	-0.198734	-0.491066		1.96035				0.0200878	2.00878e-05	-4.69707		0.37	57.73
	6. alveolus	0.9528	0.5628	-0.0209983	-0.249646		1.69296				0.0489081	4.89081e-05	-4.31062		0.37	57.73
	7. alveolus	0.1728	0.1728	-0.762456	-0.762456		1				0.000671727	6.71727e-07	-6.17281		0.37	57.73
	8. alveolus	0.9528	0.4528	-0.0209983	-0.344094		2.10424				0.0277327	2.77327e-05	-4.55701		0.37	57.73
	9. alveolus	0.1628	0.1628	-0.788346	-0.788346		1				0.00115153	1.15153e-06	-5.93872		0.37	57.73
	10. alveolus	0.7228	0.4628	-0.140982	-0.334607		1.5618				0.0300998	3.00998e-05	-4.52144		0.37	57.73
	11. alveolus	0.4528	0.2828	-0.344094	-0.548521		1.60113				0.0116433	1.16433e-05	-4.93393		0.37	57.73
	12. alveolus	1.6128	0.9228	0.207581	-0.0348924		1.74772				0.149731	0.000149731	-3.82469		0.37	57.73
	13. alveolus	0.8028	0.4528	-0.0953926	-0.344094		1.77297				0.0342581	3.42581e-05	-4.46524		0.37	57.73
	14. alveolus	1.6928	0.8328	0.228606	-0.0794593		2.03266				0.170427	0.000170427	-3.76846		0.37	57.73
	15. alveolus	0.3028	0.2328	-0.518844	-0.633017		1.30069				0.00412632	4.12632e-06	-5.38444		0.37	57.73
	16. alveolus	0.8428	0.5328	-0.0742755	-0.273436		1.58183				0.0968247	9.68247e-05	-4.01401		0.37	57.73
	17. alveolus	0.1528	0.1528	-0.815877	-0.815877		1				0.00115153	1.15153e-06	-5.93872		0.37	57.73
	18. alveolus	0.6828	0.4328	-0.165706	-0.363713		1.57763				0.0597837	5.97837e-05	-4.22342		0.37	57.73
	19. alveolus	0.1128	0.1128	-0.947691	-0.947691		1				0.000831662	8.31662e-07	-6.08005		0.37	57.73
	20. alveolus	0.4228	0.3028	-0.373865	-0.518844		1.3963	1.66364	1st replacement teeth of small		0.0210474	2.10474e-05	-4.6768		0.37	57.73
	2nd replacement	0.1628	0.1628	-0.788346	-0.788346		1	1.9438	all teeth of small		0.00140743	1.40743e-06	-5.85157		0.37	57.73
[truncated: 28 more columns]

## Sheet: Enamel thickness
	Enamel thickness
	small	small	small	small	small	medium	medium	medium	medium	medium		large	large	large	large	large
		Picture number					Picture number						Picture number
	Dent 4	9326	0.036			Dent 19	9007	0.122	0.081	0.07		Dent 11	7954	0.166	0.18	0.162
		9336	0.024	0.029		Dent 18	9021	0.116	0.071	0.08		Mx 7	7928	0.206	0.174
	Mx 6	9235	0.056	0.023	0.017	Mx 12	8111	0.096	0.066	0.072	0.072
	tip of apex	average	0.0386667	0.026	0.017			0.111333	0.0726667	0.074	0.072			0.186	0.177	0.162
		average of averages	0.0272222					0.0825						0.175
		average without apex tips	0.0243333					0.0728889						0.168333
		average of apex tips	0.056					0.111333						0.206
		average tooth length	3.90585	1.81488	<--average crown height			7.841	2.6005					31.0709	6.96562
			160.515	74.584				107.575	35.6776					184.58	41.38
			0.00622997	0.0134077				0.00929587	0.0280288					0.00541771	0.0241663
				0.023545	specific CH to enamel				0.0282772						0.0331376
				0.00900901					0.0293774	0.0225806					0.028385

## Sheet: Oblique and perpendicular trans
																	t-Test: Paired Two Sample for Means
				oblique					perpendicular									Variable 1	Variable 2
	Tooth	mean VEIW [µm]	SD	min	max	TFT [days]	mean VEIW [µm]	SD	min	max	TFT [days]	TFT difference					Mean	195.382	259.271
	Medium [NCSM 100804] Dent 18	21	5	12	34	118.452	14	4	8	21	177.679	59.2262					Variance	4468.25	5013.02
	Large [NCSM 100805] Dent 11	21	6	12	29	239.286	17.5	3	13	23.5	295.588	56.3025					Observations	3	3
	Large [NCSM 100805] Dent 11	22	6	12	36	228.409	16.5	3	12.5	21.5	304.545	76.1364					Pearson Correlation	0.989543
																	Hypothesized Mean Difference	0
																	df	2
																	t Stat	-10.3348
																	P(T<=t) one-tail	0.00461659
																	t Critical one-tail	2.91999
																	P(T<=t) two-tail	0.00923318
																	t Critical two-tail	4.30265

## Sheet: VEIW var along CA
	Transect position along CA of tooth	mean VEIW [µm]	SD	min	max	CH [mm]	TFT [days]
	apical	16	4	10	30		314.062				ANOVA: Single Factor										TUKEY HSD/KRAMER			alpha	0.05			Pairwise t tests			17
		16	3	9	30		314.062														group	mean	n	ss	df	q-crit					18
		17	3	10	24		295.588				DESCRIPTION					Alpha	0.05				CA Apex	0.0156047	86	0.00114056				group 1	group 2	p-value	mean
	mid crown	17	3	9	23	5.025	295.588				Group	Count	Sum	Mean	Variance	SS	Std Err	Lower	Upper		CA Mid	0.0172615	348	0.0044892				CA Apex	CA Mid	0.000248312	0.00165684
		18	4	11	30		279.167				CA Apex	86	1.342	0.0156047	1.34183e-05	0.00114056	0.000385088	0.014848	0.0163613		CA Base	0.0171905	42	0.000402476				CA Apex	CA Base	0.0127228	0.00158583
		18	4	11	30		279.167				CA Mid	348	6.007	0.0172615	1.29372e-05	0.0044892	0.000191434	0.0168853	0.0176377				476	0.00603224	473	3.32466		CA Mid	CA Base	0.891967	7.10181e-05
		17	4	7	29		295.588				CA Base	42	0.722	0.0171905	9.81649e-06	0.000402476	0.000551041	0.0161077	0.0182733		Q TEST
	basal	17	3	10	27		295.588														group 1	group 2	mean	std err	q-stat	lower	upper	p-value	mean-crit	Cohen d
											ANOVA										CA Apex	CA Mid	0.00165684	0.000304088	5.44856	0.000645854	0.00266783	0.000390246	0.00101099	0.463952
											Sources	SS	df	MS	F	P value	F crit	RMSSE	Omega Sq		CA Apex	CA Base	0.00158583	0.000475362	3.33603	5.40899e-06	0.00316624	0.0490279	0.00158042	0.444065
											Between Groups	0.000191835	2	9.59176e-05	7.52109	0.000608827	3.01479	0.26231	0.0266688		CA Mid	CA Base	7.10181e-05	0.000412488	0.17217	-0.00130036	0.0014424	0.991862	0.00137138	0.0198866
											Within Groups	0.00603224	473	1.27531e-05
											Total	0.00622407	475	1.31033e-05												0.000645854	0.00266783	0.000390246	0.00101099	0.463952
																										5.40899e-06	0.00316624	0.0490279	0.00158042	0.444065
																										-0.00130036	0.0014424	0.991862	0.00137138	0.0198866
										Alternate computation
											Anova: Single Factor
											SUMMARY
											Groups	Count	Sum	Average	Variance
	Transect position along CA of tooth	mean VEIW [µm]	SD	min	max	CH [mm]	TFT [days]				Column 1	86	1.342	0.0156047	1.34183e-05
	apical	16	4	10	30		314.062				Column 2	348	6.007	0.0172615	1.29372e-05
		16	3	9	30		314.062				Column 3	42	0.722	0.0171905	9.81649e-06
		17	3	10	24		295.588
	mid crown	17	3	9	23	5.025	295.588
		18	4	11	30		279.167				ANOVA
		18	4	11	30		279.167				Source of Variation	SS	df	MS	F	P-value	F crit
		17	4	7	29		295.588				Between Groups	0.000191835	2	9.59176e-05	7.52109	0.000608827	3.01479
	basal	17	3	10	27		295.588				Within Groups	0.00603224	473	1.27531e-05
											Total	0.00622407	475
																CA Apex	CA Mid	CA Base
																0.013	0.02	0.01
																0.015	0.013	0.012
																0.016	0.014	0.016
																0.013	0.013	0.014
																0.011	0.015	0.013
																0.015	0.011	0.011
																0.011	0.012	0.02
																0.016	0.012	0.017
																0.017	0.015	0.017
																0.015	0.013	0.015
																0.019	0.009	0.019
																0.016	0.01	0.019
																0.02	0.011	0.018
																0.017	0.015	0.022
																0.015	0.013	0.018
																0.013	0.011	0.019
																0.027	0.012	0.018
																0.015	0.018	0.017
																0.016	0.02	0.019
																0.015	0.019	0.017
																0.013	0.013	0.021
																0.01	0.016	0.016
																0.01	0.017	0.014
																0.012	0.019	0.023
																0.012	0.018	0.019
																0.012	0.017	0.017
																0.016	0.016	0.014
																0.012	0.014	0.019
																0.012	0.019	0.018
																0.013	0.012	0.017
																0.016	0.012	0.018
																0.013	0.017	0.018
																0.012	0.017	0.019
																0.016	0.017	0.018
																0.018	0.016	0.016
																0.015	0.017	0.016
																0.02	0.017	0.019
																0.017	0.016	0.017
																0.023	0.014	0.014
																0.014	0.02	0.014
																0.015	0.013	0.017
																0.018	0.013	0.027
																0.01	0.017
																0.016	0.016
																0.016	0.017
																0.03	0.017
																0.016	0.019
																0.023	0.017
																0.012	0.017
																0.013	0.017
																0.016	0.016
																0.016	0.018
																0.016	0.018
																0.016	0.016
																0.016	0.018
																0.015	0.015
																0.023	0.015
																0.017	0.018
																0.02	0.014
																0.022	0.016
																0.01	0.017
																0.013	0.015
																0.02	0.013
																0.014	0.018
																0.018	0.015
																0.019	0.019
																0.016	0.019
																0.015	0.015
																0.015	0.019
																0.012	0.014
																0.016	0.017
																0.018	0.018
																0.015	0.02
																0.012	0.02
																0.012	0.022
																0.018	0.018
																0.017	0.027
																0.015	0.019
																0.016	0.019
																0.013	0.021
																0.022	0.02
																0.011	0.017
																0.013	0.024
																0.018	0.024
																0.012	0.022
																0.015	0.021
																	0.021
																	0.016
																	0.023
																	0.016
																	0.017
																	0.017
																	0.01
																	0.016
																	0.024
																	0.014
																	0.017
																	0.018
																	0.021
																	0.016
																	0.016
																	0.011
																	0.02
																	0.014
																	0.018
																	0.013
																	0.013
																	0.018
																	0.022
																	0.018
																	0.016
																	0.018
																	0.016
																	0.016
																	0.021
																	0.014
																	0.015
																	0.017
																	0.015
																	0.023
																	0.015
																	0.018
																	0.019
																	0.02
																	0.021
																	0.017
																	0.022
																	0.014
																	0.015
																	0.019
																	0.013
																	0.013
																	0.018
																	0.021
																	0.019
																	0.014
																	0.014
																	0.015
																	0.014
																	0.02
																	0.017
																	0.016
																	0.018
																	0.02
																	0.018
																	0.009
																	0.015
																	0.014
																	0.016
																	0.023
																	0.023
																	0.015
																	0.015
																	0.018
																	0.017
																	0.021
																	0.016
																	0.014
																	0.011
																	0.011
																	0.02
																	0.019
																	0.017
																	0.02
																	0.016
																	0.019
																	0.017
																	0.019
																	0.015
																	0.022
																	0.016
																	0.016
																	0.019
																	0.015
																	0.02
																	0.016
																	0.02
																	0.015
																	0.02
																	0.014
																	0.015
																	0.016
																	0.019
																	0.015
																	0.018
																	0.017
																	0.015
																	0.012
																	0.011
																	0.024
																	0.016
																	0.017
																	0.017
																	0.016
																	0.02
																	0.018
																	0.016
																	0.024
																	0.018
																	0.018
																	0.017
																	0.019
																	0.017
																	0.018
																	0.014
																	0.017
																	0.022
																	0.017
																	0.016
																	0.016
																	0.016
																	0.013
																	0.02
																	0.02
																	0.016
																	0.019
																	0.019
																	0.022
																	0.012
																	0.015
																	0.024
																	0.015
																	0.016
																	0.024
																	0.022
																	0.017
																	0.018
																	0.03
																	0.02
																	0.026
																	0.015
																	0.018
																	0.017
																	0.015
																	0.012
																	0.011
																	0.024
																	0.016
																	0.017
																	0.017
																	0.016
																	0.02
																	0.018
																	0.016
																	0.024
																	0.018
																	0.018
																	0.017
																	0.019
																	0.017
																	0.018
																	0.014
																	0.017
																	0.022
																	0.017
																	0.016
																	0.016
																	0.016
																	0.013
																	0.02
																	0.02
																	0.016
																	0.019
																	0.019
																	0.022
																	0.012
																	0.015
																	0.024
																	0.015
																	0.016
																	0.024
																	0.022
																	0.017
																	0.018
																	0.03
																	0.02
																	0.026
																	0.018
																	0.016
																	0.018
																	0.015
																	0.019
																	0.022
																	0.018
																	0.018
																	0.018
																	0.014
																	0.02
																	0.021
																	0.016
																	0.023
																	0.018
																	0.019
																	0.016
																	0.018
																	0.017
																	0.018
																	0.022
																	0.013
																	0.019
																	0.02
																	0.018
																	0.013
																	0.017
																	0.017
																	0.018
																	0.017
																	0.018
																	0.016
																	0.018
																	0.019
																	0.015
																	0.015
																	0.022
																	0.029
																	0.008
																	0.018
																	0.028
																	0.015
																	0.018
																	0.014
																	0.013
																	0.021
																	0.019
																	0.019
																	0.021
																	0.014
																	0.026
																	0.015
																	0.019
																	0.016
																	0.018
																	0.016
																	0.01
																	0.016
																	0.013
																	0.029
																	0.017
																	0.011
																	0.017
																	0.007
																	0.008
																	0.013
																	0.015
																	0.016
																	0.021
																	0.021
																	0.016

## Sheet: VEIW near and far CA 
		Tooth	Transect	mean VEIW near CA [µm]	based on # VEL	TFT based on near CA VEIW	mean VEIW far CA [µm]	based on # VEL	TFT based on far CA VEIW	Difference in TFT estimates [%]				mean VEIW near CA [µm]	mean VEIW far CA [µm]					T Test: Two Independent Samples
		Medium [NCSM 100804] Dent 18	mid crown	17.5	10	142.143	13.5	15	184.259	77.1429			med Dent 18 1	0.025	0.018
			mid crown	18.4	10	135.19	13.9474	19	178.349	75.8009				0.018	0.01					SUMMARY			Hyp Mean Diff	0
		Large [NCSM 100805] Dent 4	root base	19.308	26	666.304	12.1111	9	1062.25	62.7259				0.014	0.011					Groups	Count	Mean	Variance	Cohen d
														0.013	0.011					mean VEIW near CA [µm]	47	0.0187021	3.08224e-05
														0.019	0.01					mean VEIW far CA [µm]	44	0.0134091	1.34101e-05
														0.018	0.022					Pooled			2.24097e-05	1.11812
														0.019	0.014
														0.015	0.011					T TEST: Equal Variances				Alpha	0.05
														0.027	0.011						std err	t-stat	df	p-value	t-crit	lower	upper	sig	effect r
														0.016	0.016					One Tail	0.000993033	5.33017	89	3.67371e-07	1.66216			yes	0.491912
															0.015					Two Tail	0.000993033	5.33017	89	7.34741e-07	1.98698	0.0033199	0.00726617	yes	0.491912
															0.013
															0.01					T TEST: Unequal Variances				Alpha	0.05
															0.011						std err	t-stat	df	p-value	t-crit	lower	upper	sig	effect r
															0.012					One Tail	0.000980088	5.40058	80.1684	3.30726e-07	1.66408			yes	0.516489
															0.016					Two Tail	0.000980088	5.40058	80.1684	6.61451e-07	1.99	0.00334266	0.00724341	yes	0.516489
															0.012
															0.023
															0.019
																				Alternate computations
																				t-Test: Two-Sample Assuming Unequal Variances
																					Variable 1	Variable 2		6.61451e-07
																				Mean	0.0187021	0.0134091
																				Variance	3.08224e-05	1.34101e-05
																				Observations	47	44
													med Dent 18 2							Hypothesized Mean Difference	0
																				df	80
																				t Stat	5.40058
																				P(T<=t) one-tail	3.32033e-07
																				t Critical one-tail	1.66412
																				P(T<=t) two-tail	6.64067e-07
																				t Critical two-tail	1.99006
														0.014	0.011
														0.012	0.015
														0.015	0.018
														0.013	0.016
														0.032	0.014
														0.013	0.02
														0.013	0.012
														0.018	0.013
														0.013	0.011
														0.016	0.013
														0.034	0.018
															0.008
															0.009
															0.012
															0.012
															0.014
													large Dent 4	0.018	0.011
														0.016	0.014
														0.015	0.008
														0.02	0.01
														0.016	0.013
														0.015	0.009
														0.018	0.01
														0.016	0.019
														0.022	0.015
														0.019
														0.019
														0.028
														0.031
														0.019
														0.015
														0.019
														0.02
														0.018
														0.014
														0.012
														0.014
														0.016
														0.024
														0.025
														0.027
														0.026
													SD	0.00555179	0.00366199

## Sheet: VEIW by tooth position
		VEIW in mm
			Tooth position	1	2	3	4	11	12	15	16	17	18	19
		Small Alligator	functional teeth upper dentition			0.0185		0.0126667	0.0153333			0.012	0.0116667
		NCSM 100803	replacement teeth upper dentition									0.0115
			functional teeth lower dentition		0.0133333		0.0175		0.0144				0.0145	0.0125
			replacement teeth lower dentition				0.012		0.013
		Medium Alligator	functional teeth upper dentition			0.0156*		0.0115*				0.009'	0.0135'	0.0094*
		NCSM 100804	replacement teeth upper dentition			0.02455		0.037					0.0153333	0.024
			functional teeth lower dentition					0.0115*	0.0143*				0.0128*
			replacement teeth lower dentition					0.0229939
		Large Alligator	functional teeth upper dentition	0.01425			0.023	0.017	0.0171				0.01875
		NCSM 100805	replacement teeth upper dentition		0.013		0.0183333	0.01	0.02
			functional teeth lower dentition					0.0166667			0.027
			replacement teeth upper dentition							0.026
																																														1	2	3	4
																																												Small Alligator	functional teeth lower dentition		0.0133333		0.0175
																																													replacement teeth lower dentition				0.012
				Combining replacement and functional teeth																																								Medium Alligator	functional teeth lower dentition
																																													replacement teeth lower dentition
				With just tooth positions of the same orientation																																								Large Alligator	functional teeth lower dentition				0.023
						Mean increment width by tooth position																0.0005																							replacement teeth lower dentition		0.013		0.0183333
						1	2	3	4	5	6	7	8	9	10	11	12	13	14	15	16	17	18	19	20
				Small Alligator	functional teeth upper dentition			0.0185								0.0126667	0.0153333					0.012	0.0116667
					replacement teeth upper dentition																	0.0115
				Medium Alligator	functional teeth upper dentition			0.01555								0.0115						0.009	0.0135
					replacement teeth upper dentition			0.02455								0.037							0.0153333
				Large Alligator	functional teeth upper dentition	0.01425										0.017	0.0171						0.01875
					replacement teeth upper dentition											0.01	0.02
																			Mean	SDs	only CA	SDs
				1	1	1									0.01425				0.01425		0.01425
				2	2	2			0.0133333									0.013	0.0131667	0.000235702	0.0131667	0.000235702
				2	3	3	0.0185				0.01555	0.02455							0.0195333	0.00458812	0.021525	0.004278			ANOVA by hand for all		SD from averaging SDs
				4	4	4			0.0175	0.012							0.023	0.0183333	0.0177083	0.00451002	0.0177083	0.00451002				SS	df	MS	F	F crit	p
					0	5																			Between Groups	0.000367307	10	3.67307e-05	1.04168	2.38	0.448101
					0	6																			Within Groups	0.00066996	19	3.5261e-05		From F table for alpha = 0.05
					0	7																			total	0.00103727
					0	8
					0	9
					0	10																			Just the tooth positions wit 3 or more samples
				6	8	11	0.0126667				0.0115	0.037	0.0115	0.0229939	0.017	0.01	0.0166667		0.0174159	0.00896766	0.0193879	0.00969128			ANOVA by hand for all		SD from averaging SDs
				5	6	12	0.0153333		0.0144	0.013			0.0143333		0.0171	0.02			0.0156944	0.00250727	0.0159667	0.00270226				SS	df	MS	F	F crit	p
					0	13																			Between Groups	5.67124e-05	3	1.89041e-05	0.484429	3.29	0.698106
					0	14																			Within Groups	0.000585353	15	3.90235e-05		From F table for alpha = 0.05
					1	15												0.026	0.026		0.026				total	0.000642065
					1	16											0.027		0.027		0.027
				2	3	17	0.012	0.0115			0.009								0.0108333	0.00160728	0.01175	0.000353553
				4	6	18	0.0116667		0.0145		0.0135	0.0153333	0.01275		0.01875				0.0144167	0.00248216	0.0150625	0.00291657
				2	3	19			0.0125		0.00942857	0.024							0.0153095	0.00768126	0.01825	0.00813173
					0	20
				28	38														0.0163537	0.00581044	0.0174626	0.00598062
																									1	2	3	4	5	6	7	8	9	10	11	12	13	14	15	16	17	18	19	20
																							Small Alligator	functional teeth upper dentition			0.0185								0.0126667	0.0153333					0.012	0.0116667
																								replacement teeth upper dentition																	0.0115
																								functional teeth lower dentition		0.0133333		0.0175								0.0144						0.0145	0.0125
																								replacement teeth lower dentition				0.012								0.013
																							Medium Alligator	functional teeth upper dentition			0.01555								0.0115						0.009	0.0135	0.00942857
													ANOVA by hand for all		SD from calculation from those present									replacement teeth upper dentition			0.02455								0.037							0.0153333	0.024
														SS	df	MS	F	F crit	p					functional teeth lower dentition											0.0115	0.0143333						0.01275
													Between Groups	0.000144847	2	7.24235e-05	2.29538	3.27	0.115691					replacement teeth lower dentition											0.0229939
													Within Groups	0.00110432	35	3.15519e-05		From F table for alpha = 0.05					Large Alligator	functional teeth upper dentition	0.01425										0.017	0.0171						0.01875
													total	0.00124916										replacement teeth upper dentition											0.01	0.02
																								functional teeth lower dentition				0.023							0.0166667					0.027
																SDs								replacement teeth lower dentition		0.013		0.0183333											0.026
												overall mean	small mean	medium mean	large mean		overall mean	small mean	medium mean	large mean			median	small		0.0133333	0.0185	0.01475							0.0126667	0.0144					0.01175	0.0130833	0.0125
												0.0163537	0.0137615	0.0170338	0.018425									medium			0.02005								0.017247	0.0143333					0.009	0.0135	0.0167143
																calculated	0.00581044	0.00221952	0.00798981	0.00503764				large	0.01425			0.023							0.0166667	0.01855				0.027		0.01875
																							mean	small		0.0133333	0.0185	0.01475							0.0126667	0.0142444					0.01175	0.0130833	0.0125
																								medium			0.02005								0.0207485	0.0143333					0.009	0.0138611	0.0167143
																								large	0.01425	0.013		0.0206667							0.0145556	0.01855			0.026	0.027		0.01875
[truncated: 16 more columns]

## Sheet: TFT +- SD
			SDs																						TFT from VEIW of all sampled positions
																										crown height	0.1928	0.2028	0.9228	1.175	1.2328	1.5628	1.6228	1.6428	1.785	1.7928	1.8628	2.0528	2.055	2.0628	2.1328	2.1928	3.475	4.565	5.025	5.265	5.655	6.225	6.415
					1	2	3	4	5	6	7	8	9	10	11	12	13	14	15	16	17	18	19	20		TFT by sampled CA sections	16.0667	17.6348	70.9846	90.3846	70.4457	130.233	121.71	131.424	89.25	96.9081	128.469	175.954	205.5	134.53	148.111	173.116	133.654	249	301.5	195	396.842	364.035	342.133
			Small Alligator	functional teeth upper dentition			0.004								0.003	0.003					0.003	0.003				VEIW of the tooth	0.012	0.0115	0.013	0.013	0.0175	0.012	0.0133333	0.0125	0.02	0.0185	0.0145	0.0116667	0.01	0.0153333	0.0144	0.0126667	0.026	0.0183333	0.0166667	0.027	0.01425	0.0171	0.01875
				replacement teeth upper dentition																	0.0025					TFT + SD	26.7394	30.222	112.395	143.112	96.9919	216.744	189.942	213.065	117.354	130.763	191.837	298.502	394.409	195.644	221.928	278.38	163.835	337.058	423.087	237.052	597.759	505.673	459.516
						0.003		0.0048								0.0037						0.003	0.0028			TFT - SD	11.4833	12.4496	51.8728	66.0496	55.3081	93.0811	89.5437	95.0163	72.0058	76.9783	96.5698	124.742	138.948	102.51	111.143	125.616	112.863	197.422	234.197	165.62	297.012	284.381	272.519
								0.003								0.003										SD +	10.6727	12.5873	41.4103	52.7277	26.5462	86.5112	68.2319	81.6407	28.1044	33.8546	63.3679	122.548	188.909	61.1131	73.8167	105.264	30.1814	88.0579	121.587	42.0518	200.917	141.638	117.383
			Medium Alligator	functional teeth upper dentition																						SD -	-4.58341	-5.18517	-19.1118	-24.335	-15.1376	-37.1523	-32.1663	-36.4077	-17.2442	-19.9298	-31.8991	-51.212	-66.5516	-32.0209	-36.968	-47.4995	-20.7913	-51.5775	-67.3034	-29.3801	-99.8306	-79.6543	-69.6146
				replacement teeth upper dentition			0.00246								0.011							0.0037	0.004			SD + [%]	66.4278	71.3775	58.3371	58.3371	37.6832	66.4278	56.061	62.1201	31.4896	34.9347	49.3255	69.6476	91.9263	45.427	49.8387	60.8057	22.5818	35.3646	40.3272	21.565	50.6289	38.9077	34.3091
																										SD - [%]	-28.5275	-29.4031	-26.9239	-26.9239	-21.4883	-28.5275	-26.4287	-27.7025	-19.3212	-20.5656	-24.8302	-29.1053	-32.3852	-23.802	-24.9596	-27.438	-15.5561	-20.7139	-22.3229	-15.0667	-25.1563	-21.8809	-20.3472
															0.015											TFT (tooth specific SD) +	21.4222	22.5333	92.28	126.344	97.0709	173.644	157.045	169.361	122.26	123.641	161.983	236.862	256.875	167.254	199.327	226.841	193.056	325.994	381.646	256.829	904.8	1020.49	476.952
			Large Alligator	functional teeth upper dentition	0.008										0.003	0.011						0.0053				TFT (tooth specific SD) -	12.8533	14.4857	57.675	70.3593	55.2825	104.187	99.3551	107.373	70.2756	79.68	106.446	139.964	171.25	112.516	117.834	139.966	102.206	201.427	249.174	157.164	254.157	221.53	266.736
				replacement teeth upper dentition											0.002	0.0054										SD +	5.35556	4.89855	21.2954	35.9595	26.6252	43.4111	35.3352	37.9368	33.0103	26.7333	33.5136	60.9073	51.375	32.7236	51.216	53.7256	59.4017	76.9938	80.1456	61.8293	507.958	656.457	134.818
								0.005							0.0035					0.0065						SD -	-3.21333	-3.14907	-13.3096	-20.0253	-15.1632	-26.0467	-22.3549	-24.0515	-18.9744	-17.2281	-22.0233	-35.9906	-34.25	-22.0141	-30.2769	-33.1498	-31.448	-47.5733	-52.3264	-37.8358	-142.685	-142.505	-75.3974
						0.0037		0.00433											0.008						# measurents for CA	SD + [%]	33.3333	27.7778	30	39.7849	37.7953	33.3333	29.0323	28.866	36.9863	27.5862	26.087	34.6154	25	24.3243	34.5794	31.0345	44.4444	30.9212	26.5823	31.7073	128	180.328	39.4052
			mean	small		0.003	0.004	0.0039							0.003	0.00323333					0.00275	0.003	0.0028		38	SD - [%]	-20	-17.8571	-18.75	-22.1557	-21.5247	-20	-18.3673	-18.3007	-21.2598	-17.7778	-17.1429	-20.4545	-16.6667	-16.3636	-20.442	-19.1489	-23.5294	-19.1058	-17.3554	-19.403	-35.9551	-39.1459	-22.0374
				medium			0.00123								0.0065	0					0	0.00123333	0.002		9	Tooth specific SD	0.003	0.0025	0.003	0.0037	0.0048	0.003	0.003	0.0028	0.0054	0.004	0.003	0.003	0.002	0.003	0.0037	0.003	0.008	0.00433	0.0035	0.0065	0.008	0.011	0.0053
				large	0.008	0.0037		0.004665							0.00283333	0.0082			0.008	0.0065		0.0053			40
																									87																				SD/VEIW ratio for tooth used in Fig. 5 (VEIW variation along the CA)
			mean of all:	0.00478967																						Replacement rates from Erickson 1996			Alligator mean	0.016		ratio SD/VEIW	0.299354												0.21
	crown heights of the sampled positions				1	2	3	4	5	6	7	8	9	10	11	12	13	14	15	16	17	18	19	20
			Small Alligator	functional teeth upper dentition	1.4328	1.7728	1.7928	1.4328	1.7628	1.6928	2.4328	1.7928	2.5128	1.8328	2.1928	2.0628	2.1028	2.2828	1.3528	2.3028	1.5628	2.0528	1.3528	1.7528
				replacement teeth upper dentition	0.1628	0.7728	0.5328	0.3128	0.5628	0.4728	0.9528	0.6028	1.2228	0.5028	0.9328	0.4228	1.0628	0.6128	0.2828	0.7528	0.2028	0.4528		0.3328
				functional teeth lower dentition	2.1428	1.6228	1.8428	1.2328	1.5728	1.9228	1.0828	1.7028	1.1128	1.8128	1.4928	2.1328	1.8128	2.2828	1.5728	2.0428	1.4128	1.8628	1.6428	2.8328
				replacement teeth lower dentition	0.6628	0.8228	0.5428	0.1928	0.3228	0.5628	0.1728	0.4528	0.1628	0.4628	0.2828	0.9228	0.4528	0.8328	0.2328	0.5328	0.1528	0.4328	0.1128	0.3028
			Large Alligator	functional teeth upper dentition	5.655	8.055	11.455		8.645	7.205	1.185	5.455	12.725	6.025	8.825	6.225	6.215		10.435	6.855	7.765	6.415	6.175	4.555
				replacement teeth upper dentition	3.145	4.795		2.965	2.965	3.915					2.055	1.785	0.955		4.225	1.435	2.905	1.685
				functional teeth lower dentition		4.625		12.865	7.425	5.565	4.385	4.215	5.565	4.555	5.025	9.475	11.975	7.705	6.975	5.265
				replacement teeth lower dentition		1.175		4.565	2.505	3.115	1.135	1.875	3.365	1.545		2.345	3.925		3.475	0.985	0.985
			# of VEIWs
					1	2	3	4	5	6	7	8	9	10	11	12	13	14	15	16	17	18	19	20
			Small Alligator	functional teeth upper dentition			65								89	212					26	256
				replacement teeth upper dentition																	55
						192		202								562						213	189
								63								217
			Medium Alligator	functional teeth upper dentition
				replacement teeth upper dentition			32								15							45	38
															10
			Large Alligator	functional teeth upper dentition	363										33	348						385
				replacement teeth upper dentition											21	87
								57							520					34
						178		130											17
				4654
				crown height [mm]	0.1928	0.2028	0.9228	1.175	1.2328	1.5628	1.6228	1.6428	1.785	1.7928	1.8628	2.0528	2.055	2.0628	2.1328	2.1928	3.475	4.565	5.025	5.265	5.655	6.225	6.415	8.825	12.865	Mean	Variance	t -statistic	p-value		crown height [mm]	0.1928	0.2028	0.9228	1.175	1.2328	1.5628	1.6228	1.6428	1.785	1.7928	1.8628	2.0528	2.055	2.0628
				TFT by sampled CA sections [days]	16.0667	17.6348	70.9846	90.3846	70.4457	130.233	121.71	131.424	89.25	96.9081	128.469	175.954	205.5	134.53	148.111	173.116	133.654	249	301.5	195	396.842	364.035	342.133	519.118	559.348	194.454	20739				TFT by sampled CA sections [days]	16.0667	17.6348	70.9846	90.3846	70.4457	130.233	121.71	131.424	89.25	96.9081	128.469	175.954	205.5	134.53
				VEIW of the tooth [mm]	0.012	0.0115	0.013	0.013	0.0175	0.012	0.0133333	0.0125	0.02	0.0185	0.0145	0.0116667	0.01	0.0153333	0.0144	0.0126667	0.026	0.0183333	0.0166667	0.027	0.01425	0.0171	0.01875	0.017	0.023						VEIW of the tooth [mm]	0.012	0.0115	0.013	0.013	0.0175	0.012	0.0133333	0.0125	0.02	0.0185	0.0145	0.0116667	0.01	0.0153333
				TFT + SD [days]	26.7394	30.222	112.395	143.112	96.9919	216.744	189.942	213.065	117.354	130.763	191.837	298.502	394.409	195.644	221.928	278.38	163.835	337.058	423.087	237.052	597.759	505.673	459.516	722.748	706.467	280.449	37706.4	1.77855	0.0411114		Tooth specific SD [mm]	0.003	0.0025	0.003	0.0037	0.0048	0.003	0.003	0.0028	0.0054	0.004	0.003	0.003	0.002	0.003
				TFT - SD [days]	11.4833	12.4496	51.8728	66.0496	55.3081	93.0811	89.5437	95.0163	72.0058	76.9783	96.5698	124.742	138.948	102.51	111.143	125.616	112.863	197.422	234.197	165.62	297.012	284.381	272.519	405.008	462.942	150.211	13402.6	-1.19721	0.118679		TFT (tooth specific SD) + [days]	21.4222	22.5333	92.28	126.344	97.0709	173.644	157.045	169.361	122.26	123.641	161.983	236.862	256.875	167.254
				SD + [days]	10.6727	12.5873	41.4103	52.7277	26.5462	86.5112	68.2319	81.6407	28.1044	33.8546	63.3679	122.548	188.909	61.1131	73.8167	105.264	30.1814	88.0579	121.587	42.0518	200.917	141.638	117.383	203.631	147.119						TFT (tooth specific SD) - [days]	12.8533	14.4857	57.675	70.3593	55.2825	104.187	99.3551	107.373	70.2756	79.68	106.446	139.964	171.25	112.516
				SD - [days]	-4.58341	-5.18517	-19.1118	-24.335	-15.1376	-37.1523	-32.1663	-36.4077	-17.2442	-19.9298	-31.8991	-51.212	-66.5516	-32.0209	-36.968	-47.4995	-20.7913	-51.5775	-67.3034	-29.3801	-99.8306	-79.6543	-69.6146	-114.109	-96.406						SD + [days]	5.35556	4.89855	21.2954	35.9595	26.6252	43.4111	35.3352	37.9368	33.0103	26.7333	33.5136	60.9073	51.375	32.7236
				SD + [%]	66.4278	71.3775	58.3371	58.3371	37.6832	66.4278	56.061	62.1201	31.4896	34.9347	49.3255	69.6476	91.9263	45.427	49.8387	60.8057	22.5818	35.3646	40.3272	21.565	50.6289	38.9077	34.3091	39.2263	26.3019						SD - [days]	-3.21333	-3.14907	-13.3096	-20.0253	-15.1632	-26.0467	-22.3549	-24.0515	-18.9744	-17.2281	-22.0233	-35.9906	-34.25	-22.0141
				SD - [%]	-28.5275	-29.4031	-26.9239	-26.9239	-21.4883	-28.5275	-26.4287	-27.7025	-19.3212	-20.5656	-24.8302	-29.1053	-32.3852	-23.802	-24.9596	-27.438	-15.5561	-20.7139	-22.3229	-15.0667	-25.1563	-21.8809	-20.3472	-21.9814	-17.2354						SD + [%]	33.3333	27.7778	30	39.7849	37.7953	33.3333	29.0323	28.866	36.9863	27.5862	26.087	34.6154	25	24.3243
																																			SD - [%]	-20	-17.8571	-18.75	-22.1557	-21.5247	-20	-18.3673	-18.3007	-21.2598	-17.7778	-17.1429	-20.4545	-16.6667	-16.3636
[truncated: 28 more columns]

## Sheet: Body length vs. VEIW, TRR
						Are volumes from Erickson wrong by factor of 10? Corrected
			Extend of Ericksons (1996) and Erickson (1992 MSc Thesis) tables									skull lengths estimated for all but small and medium alligator from this study
			Taxon (total length, m)		Sample size (n)	Mean crown vol (cc)	Mean tooth vol (cmm)	Mean tooth replacement rate est. (days)	STD	VEIW (average increment width)	VEIW (average) preliminary correction	skull length		r squared	p value (actual degrees of freedom)		r squared skull	p value skull (actual degrees of freedom)
													VELW All data	0.386636	0.0738072		0.379953	0.0770909
		Erickson 1992 referencing Westergard & Ferguson (1990)	Alligator	0.22	1			6.49					VELW Erickson 1996 & this study	0.405591	0.173862
				0.3	1			24.74					VELW Erickson 1996	0.889511	0.215716
		Erickson 1996 referencing Westergard & Ferguson (1990)		0.18				11.41					VELW This study	0.786741	0.305593
				0.2				20.26						r squared	p value (actual degrees of freedom)
			Alligator (0.37)	0.37	1	0.000702369	1.37067	90.474		13.6	13.6	57.73	replacement rate all alligators	0.899151	9.87613e-05
		Erickson 1996	Alligator (0.60)	0.6	2	0.002		83	1.4	6.6	8.36	65.8752	replacement rate this study	0.993194	0.0525781
		Erickson 1996	Alligator (0.85)	0.85	2	0.004		109	2	10.5	13.3	100.938	replacement rate all + Erickson 1992	0.882997	1.74411e-05
			Alligator (0.90)	0.9	1	0.00323535	11.2194	133.618		16.2	16.2	115.6	replacement rate all + Erickson 1996	0.892461	1.18815e-05
		Erickson 1996	Alligator (1.40)	1.4	2	0.012		122	2.1	13	16.4667	178.077
		Erickson 1992	Alligator (1.50)	1.5	?	0.02		115		14	17.7333	192.102
		Erickson 1992	Alligator (2.50)	2.5	?	0.045		154		16.3	20.6467	332.355						OLS Regressions
		Erickson 1992	Alligator (3.20)	3.2	?	0.13		260		14	17.7333	430.532
			Alligator (3.95)	3.95	1	0.148376	829.516	278.998		18.07	18.07	428
		Erickson 1992 referencing Westergard & Ferguson (1990)	Alligator	0.22	1			6.49
				0.3	1			24.74
			Alligator (0.37)	0.37	1		1.37067	90.474		13.6
			Alligator (0.90)	0.9	1		11.2194	133.618		16.2
			Alligator (3.95)	3.95	1		829.516	278.998		18.07
		Erickson 1996	Alligator (0.60)	0.6	2	0.002		83	1.4	6.6
		Erickson 1996	Alligator (0.85)	0.85	2	0.004		109	2	10.5
		Erickson 1996	Alligator (1.40)	1.4	2	0.012		122	2.1	13
		Erickson 1996	Caiman (0.13)	0.13	1	0.001		111	1.1	5.2
			VAR.S	1.55298				5093.17		11.6649	12.8957
				1.61386				7004.9
		Elements for reduced major axis regression calculation		1.58045				7027.28
			uncorrected VEIW	corrected VEIW	replacement rate no hatchlings	replacement rate hatchlings low	replacement rate hatchlings high
		Mean x	1.69667	1.69667	1.69667	1.42273	1.43545
		Mean y	13.5856	15.79	149.566	125.251	125.211
		DEVSQ x	12.4238	12.4238	12.4238	16.1386	15.8045
		DEVSQ y	93.319	103.166	40745.4	70049	70272.8
		SUM Product - means	21.1721	24.2129	674.656	1004.45	990.292
		n	9	9	9	11	11
		lambda	0.133133	0.120426	0.000304913	0.00023039	0.000224902
		b0	8.93554	10.9008	52.4009	31.5186	29.4931
		b1	2.74068	2.88165	57.268	65.8822	66.6812
						reduced major axis replacement rate hatchlings low	reduced major axis replacement rate hatchlings high
						43.3773
	x	y	reduced major axis uncorrected values	reduced major axis corrected values	reduced major axis replacement rate no hatchlings	44.695
	0.37	13.6	9.94959	11.967	73.59	55.895	54.1651
	0.6	8.36	10.5799	12.6298	86.7617	71.0479	69.5018																								Reduced Major Axis Regressions
	0.85	13.3	11.2651	13.3502	101.079	87.5184	86.1721
	0.9	16.2	11.4021	13.4943	103.942	90.8125	89.5061
	1.4	16.4667	12.7725	14.9351	132.576	123.754	122.847
	1.5	17.7333	13.0466	15.2233	138.303	130.342	129.515
	2.5	20.6467	15.7872	18.1049	195.571	196.224	196.196
	3.2	17.7333	17.7057	20.1221	235.658	242.341	242.873
	3.95	18.07	19.7612	22.2833	278.609	291.753	292.884
							44.1629
							49.4974

[truncated: 4 more sheets: TFTs in Archosaurs, TRR in Sauropods, TH, CAH, TFT relations, Collected fig and table illus]
