# Supplementary material for: Sampling impacts the assessment of tooth growth and replacement rates in archosaurs: implications for paleontological studies
Source: PeerJ. 2020 Sep 18;8:e9918. doi: 10.7717/peerj.9918 (PMC7505082; doi:10.7717/peerj.9918)
Supplement: Supplemental Information 5 — The raw measurements of von Ebener line increment widths (VEIWs) are provided in Data S2, S3, and S4. The data shows all measured transects and next to the name of the picture file it was measured from the position of the transect within the tooth. On a second sheet in each of these files tooth formation times (TFT) are calculated for scenarios using CAH, TH and transect length for each transect. [file peerj-08-9918-s005.xlsx]

## Sheet: Teeth basic data corr crown h
	Pmx 1	no von Ebner lines visible?									Pmx 3										Mx 6										Mx 7										Mx 12
											9215 central axis, upper 2/3										9227 central axis, mid region										9264 central axis, lower 2/3										9272 central axis, mid part
												Label	Area	Mean	Min	Max	Angle	Length				Label	Area	Mean	Min	Max	Angle	Length				Label	Area	Mean	Min	Max	Angle	Length				Label	Area	Mean	Min	Max	Angle	Length
											1		8.6e-06	86.174	73	100.383	-113.749	0.015			1		9.82e-06	45.44	38.141	52.873	93.691	0.017			1		9.82e-06	85.296	78.548	90.698	-56.821	0.017			1		5.22e-06	107.595	97.256	121.667	-31.608	0.009
											2		1.11e-05	75.774	72	80.638	66.371	0.019			2		9.82e-06	60.831	49.111	75.667	-90	0.017			2		9.21e-06	81.113	78.885	83.78	126.469	0.016			2		9.21e-06	111.704	85.075	136.545	147.381	0.016
											3		5.83e-06	74.863	71.056	76.556	-119.358	0.01			3		6.45e-06	68.315	61.333	78.4	95.711	0.011			3		1.07e-05	77.401	74.504	81.333	-53.471	0.019			3		4.3e-06	109.824	71.974	135.679	-28.61	0.007
											4		9.21e-06	73.662	69.762	76.667	67.834	0.016			4		8.6e-06	80.042	49.581	104.037	-90	0.015			4		8.29e-06	75.057	72.513	76.667	125.538	0.014			4		8.6e-06	109.42	76.917	134.568	146.889	0.015
											5		1.04e-05	70.698	66.554	73.65	-115.017	0.018			5		6.14e-06	101.178	71.556	120.491	90	0.011			5		7.67e-06	74.991	72.333	77.917	-51.71	0.013			5		7.67e-06	94.321	84.604	107.583	-29.745	0.014
											6		7.67e-06	68.266	64.333	72	67.751	0.013			6		6.45e-06	101.13	89.333	120.296	-87.138	0.011			6		9.21e-06	75.175	71.667	78.664	125.311	0.016			6		6.45e-06	88.862	67.033	109.911	147.095	0.011
											7		7.98e-06	67.113	63.525	69.661	-113.499	0.014			7		5.83e-06	115.76	96.42	135.79	93.18	0.01			7		7.98e-06	75.236	71.667	77.667	-53.13	0.014			7		5.22e-06	81.347	72	97.639	-34.695	0.009
											8		1.01e-05	70.164	67	74	65.854	0.018			8		8.6e-06	120.119	90.667	139.252	-90	0.015			8		8.9e-06	74.486	73.167	76.432	124.824	0.016			8		7.37e-06	96.789	81.616	112.637	147.724	0.013
											9		1.72e-05	77.047	72.033	83.184	-115.641	0.031			9		7.37e-06	109.052	90.667	127.312	92.386	0.013			9		9.82e-06	74.894	72.782	76.599	-51.633	0.017			9		1.14e-05	114.333	92.63	135.333	-30.141	0.02
											10		1.32e-05	80.899	74.85	84.381	65.898	0.023			10		7.37e-06	115.805	88.665	151.992	-87.51	0.013			10		9.21e-06	73.586	69.203	77	123.69	0.016			10		7.67e-06	79.892	66.421	112.167	148.241	0.013
											11		1.07e-05	85.486	80	88.765	-114.305	0.019			11		5.53e-06	135.041	113.778	182.91	93.366	0.009			11		6.14e-06	74.155	68.956	80.474	-51.34	0.011			11		8.29e-06	63.394	48	84	-33.69	0.014
											12		9.21e-06	88.942	85.7	91.931	65.225	0.016			12		7.37e-06	126.106	101.687	156.539	-87.51	0.013			12		7.67e-06	71.994	67.056	76.667	124.992	0.014			12		6.45e-06	47.531	36.305	56.633	150.945	0.011
											13		9.52e-06	90.811	87.333	95.4	-113.199	0.017			13		7.37e-06	122.553	91.818	156.769	92.49	0.013			13		9.52e-06	71.348	69.52	73.28	-53.13	0.017			13		5.53e-06	33.104	31.255	37.167	-29.745	0.009
											14		8.6e-06	89.229	87.346	92	63.435	0.015			14		7.37e-06	116.425	98.599	149	-90	0.013			14		9.21e-06	71.509	69.069	73.152	125.311	0.016			14		7.06e-06	29.521	28.092	32.197	144.162	0.012
											15		8.6e-06	88.179	83.388	92.333	-113.749	0.015			15		7.67e-06	102.377	83.972	118.056	94.764	0.013			15		7.67e-06	72.941	71	75.222	-55.008	0.014			15		7.06e-06	27.04	24.985	28.667	-30.069	0.012
											16		9.52e-06	89.121	87.2	92.333	66.038	0.016			16		7.67e-06	112.287	89.235	129.111	-87.614	0.013			16		9.52e-06	71.672	68.24	74	126.87	0.017			16		5.83e-06	28.051	27.111	28.978	150.642	0.01
											17		1.04e-05	89.621	85.488	93.441	-115.017	0.018			17		7.37e-06	99.235	64.815	124.933	92.49	0.013			17		8.6e-06	70.851	69.173	73.034	-53.973	0.015			17		7.06e-06	30.817	28.167	33.672	-33.69	0.012
											18		7.67e-06	87.651	84.604	90.951	65.556	0.013			18		7.67e-06	91.508	75.333	123.667	-92.386	0.013			18		7.67e-06	70.726	67.49	72.438	128.29	0.013			18		8.29e-06	34.22	30.5	39.892	150.524	0.015
											19		6.45e-06	89.171	87.667	91.667	-116.565	0.011			19		7.37e-06	93.313	87.984	96.566	92.49	0.013			19		1.01e-05	72.008	69.453	75.426	-51.34	0.018			19		4.91e-06	39.33	32.667	47.667	-33.69	0.008
											20		1.14e-05	91.556	87.889	94.975	63.435	0.02			20		6.14e-06	95.753	84.889	109.561	-90	0.01			20		7.06e-06	72.837	69	75	122.276	0.012			20		6.14e-06	49.46	45.764	54.445	147.995	0.01
											21		1.44e-05	90.324	87.086	93.25	-113.199	0.025			21		6.75e-06	71.287	56.746	86.016	90	0.012			21		9.21e-06	71.546	67	74.839	-56.31	0.016			21		6.75e-06	58.656	44.524	76.714	-31.43	0.011
											22		1.14e-05	88.426	84.778	92.444	63.435	0.02			22		6.75e-06	63.934	39.565	77.429	-87.397	0.012			22		9.21e-06	72.638	69.784	76	125.311	0.016			22		4.91e-06	47.7	39.667	56	151.699	0.008
											23		8.9e-06	91.696	89.549	96	-111.038	0.015			23		7.37e-06	59.823	36.852	67.333	92.49	0.013			23		5.83e-06	73.209	70.438	75.79	-51.843	0.01			23		1.01e-05	66.589	39.667	82.406	-34.695	0.018
											24		6.14e-06	90.115	87.421	96	64.799	0.01			24		6.75e-06	44.352	25.926	63.667	-90	0.012			24		6.75e-06	73.504	70.619	75.129	121.43	0.012			24		7.37e-06	60.03	43.009	70.582	149.036	0.013
											25		9.21e-06	87.121	85.667	89.046	-116.565	0.016			25		4.91e-06	59.603	53.07	62.973	97.595	0.009			25		7.98e-06	74.308	72.613	76.185	-46.637	0.014			25		6.45e-06	48.234	37.185	60.15	-32.905	0.011
											26		1.01e-05	87.3	84.667	90	65.854	0.018			26		6.14e-06	58.012	54.042	61.667	-90	0.01			26		1.01e-05	74.096	72.302	75.849	-53.842	0.018			26		7.67e-06	37.895	32.667	48.333	149.036	0.013
											27		9.52e-06	87.435	85.167	90.667	-113.962	0.016			27		9.82e-06	57.789	46.28	63.194	90	0.017			27		7.67e-06	73.808	70.302	77.125	128.29	0.013			27	Mean	7.04e-06	65.218	52.503	78.509	58.333	0.012
											28		8.6e-06	86.891	84.398	90	66.251	0.015			28		8.6e-06	53.678	41.805	59.442	-87.879	0.015			28		8.29e-06	76.313	73.256	78.641	-54.462	0.014			28	SD	1.66e-06	30.416	23.384	37.701	92.044	0.003
											29		1.23e-05	86.597	82	90.513	-115.907	0.022			29		9.21e-06	48.172	25.746	58.829	91.975	0.016			29		6.14e-06	72.6	67.614	77.333	124.509	0.011			29	Min	4.3e-06	27.04	24.985	28.667	-34.695	0.007
											30		9.21e-06	78.545	76.229	82	65.225	0.016			30		6.14e-06	51.016	38.833	57.947	-86.82	0.01			30		1.32e-05	77.051	70.299	86	-54.782	0.023			30	Max	1.14e-05	114.333	97.256	136.545	151.699	0.02
											31		1.11e-05	76.751	73.8	79.359	-115.115	0.02			31		7.98e-06	53.141	47.407	56.44	92.291	0.014			31		6.14e-06	88.668	84.105	95.568	128.66	0.011			1	Full length (all measured along the transect)	0.000175	67.818	25.007	143.688	148.379	0.315
											32		9.52e-06	78.76	76	82.6	66.038	0.016			32	Mean	7.37e-06	84.938	67.221	102.199	4.86	0.013			32		9.21e-06	88.659	83.587	92.552	-53.531	0.016			2	Full length (complete crown length at lvl of slice)	0.000272	59.454	19.333	147.158	148.371	0.491
											33		1.38e-05	72.107	67.333	76	-114.228	0.024			33	SD	1.26e-06	28.453	25.062	37.725	92.351	0.002			33		1.01e-05	79.921	76.206	86.667	-53.842	0.018											# of von Ebner Lines
											34		1.04e-05	66.607	64	68.333	62.65	0.018			34	Min	4.91e-06	44.352	25.746	52.873	-92.386	0.009			34		9.52e-06	79.568	75.667	82	-53.13	0.017											26.25
											35		7.06e-06	68.062	65.333	70.325	-110.854	0.012			35	Max	9.82e-06	135.041	113.778	182.91	97.595	0.017			35		7.67e-06	81.065	75.988	87.333	128.29	0.013						13.6389	32.7333	8.75	21	min	15.75
											36		1.2e-05	67.964	65.621	71.146	66.801	0.021			32	Full length (measured along transect)	0.000219	86.627	38.006	175.251	92.014	0.394			36		7.37e-06	88.222	82.891	93	-55.62	0.013							54.5556		35	max	45
											37		1.2e-05	62.975	60.127	67	-118.61	0.021			33	Full length of tooth on slice (from IMG_9215)	0.000517	56.304	0.037	169.015	91.906	0.933			37		9.52e-06	83.483	76.587	93.627	126.87	0.017
											38	Mean	9.97e-06	81.138	77.565	84.854	-27.057	0.017											# of von Ebner Lines		38		5.53e-06	81.628	76.667	86.473	-57.265	0.009
											39	SD	2.34e-06	8.979	9.183	9.519	91.319	0.004											30.3077	71.7692	39		5.22e-06	76.692	72	79	129.806	0.009
											40	Min	5.83e-06	62.975	60.127	67	-119.358	0.01						13.049	62.2	5.51049	26.2667	min	23.1765	54.8824	40		8.6e-06	76.893	73	80.667	-51.009	0.015
											41	Max	1.72e-05	91.696	89.549	100.383	67.834	0.031							84.8182		35.8182	max	43.7778	103.667	41		7.06e-06	79.498	76.386	81.353	123.69	0.012
											38	Full length of measured transect	0.000363	81.416	60.623	134.781	-114.724	0.656			9232 central axis, mid region										42		8.6e-06	79.107	74.992	86.185	-55.713	0.015
											39	Ful length of tooth on slice	0.000559	73.92	45.172	145.268	-114.637	1.009				Label	Area	Mean	Min	Max	Angle	Length			43		8.6e-06	78.521	73.926	82.296	128.991	0.015
																			# of von Ebner Lines		1		8.29e-06	21.743	19.47	23.496	94.399	0.014			44		6.14e-06	81.468	78.659	85.33	-53.746	0.01
																			38.5882	59.3529	2		7.98e-06	22.418	18.883	24.667	-85.426	0.014			45		6.75e-06	81.447	77.163	83.857	121.43	0.012
														23.2846	48.0476	15.1385	31.2381	min	21.1613	32.5484	3		9.21e-06	23.874	20.084	28.667	91.975	0.016			46		7.37e-06	78.063	68.896	81.973	-52.125	0.013
															77.6154		50.4615	max	65.6	100.9	4		9.82e-06	32.609	21.981	45.835	-84.472	0.017			47		7.98e-06	78.71	72.307	90.332	130.101	0.014
											9213 central axis, mid region	Full distance									5		7.98e-06	36.497	29.925	44.662	94.764	0.014			48		6.14e-06	76.547	74	79.651	-57.995	0.01
												Label	Area	Mean	Min	Max	Angle	Length			6		5.83e-06	42.903	28	55.383	-86.82	0.01			49		8.29e-06	80.867	74	83.888	127.304	0.015
											1		1.26e-05	19.669	14.283	22.667	137.045	0.022			7		5.53e-06	34.806	24.157	50.478	93.366	0.009			50		5.83e-06	80.881	76.062	86	-51.843	0.01
											2		1.11e-05	22.903	19.796	27.262	-40.426	0.02			8		5.53e-06	36.815	26	47.552	-83.29	0.01			51		5.53e-06	75.464	64.667	79.412	130.236	0.009
											3		1.2e-05	23.456	13	27.841	135	0.021			9		8.6e-06	62.667	34.037	110.258	94.236	0.015			52		9.21e-06	77.408	64.667	83.463	-56.31	0.016
											4		1.11e-05	25.734	13	34.682	-41.496	0.019			10		9.21e-06	55.765	43.037	66.423	-88.025	0.016			53		6.14e-06	72.972	69.305	75	124.509	0.011
											5		1.41e-05	28.746	23.114	36.022	136.79	0.025			11		6.14e-06	48.359	35.24	59.205	96.009	0.011			54		9.21e-06	73.387	66.667	79.149	-54.689	0.016
											6		1.29e-05	31.407	25.131	38.352	-45	0.023			12		6.45e-06	66.799	50.037	85.422	-87.138	0.011			55		9.82e-06	71.386	62.327	74.189	128.367	0.017
											7		1.41e-05	31.552	24.667	37.667	138.576	0.025			13		5.53e-06	56.447	44.984	66.659	96.71	0.009			56		7.06e-06	73.776	68.667	80.382	-57.724	0.012
											8		1.26e-05	32.424	24.667	40.229	-43.995	0.022			14		7.37e-06	73.195	47.838	96.316	-84.806	0.013			57		5.53e-06	70.267	59.537	79.667	120.964	0.01
											9		1.17e-05	31.451	27.892	35.82	137.203	0.02			15		8.9e-06	68.824	51.619	93.571	92.045	0.016			58		9.82e-06	71.181	66.333	76.667	-54.246	0.017
											10		1.14e-05	32.505	25.333	42.833	-41.634	0.02			16		7.37e-06	77.35	59	86.275	-85.236	0.013			59		5.53e-06	69.403	66.333	71.818	125.538	0.01
											11		1.26e-05	34.464	27.787	43.733	135	0.022			17		4.91e-06	61.897	53.2	76.2	90	0.008			60		5.22e-06	66.829	61.333	72.24	-47.49	0.009
											12		7.37e-06	38.462	36.695	41.963	-39.806	0.013			18		4.91e-06	52.147	46.229	57.333	-82.405	0.009			61		9.21e-06	66.563	62.727	70.757	120.964	0.016
											13		9.52e-06	38.769	34.337	45.067	135	0.016			19		6.14e-06	50.464	46.398	56.097	93.013	0.01			62		7.37e-06	67.804	63.793	73.723	-52.125	0.013
											14		1.54e-05	38.524	33.725	43.497	-42.51	0.027			20		7.06e-06	52.814	49.357	55.879	-87.397	0.012			63		7.98e-06	65.673	62.24	70.2	126.87	0.014
											15		8.9e-06	42.709	38.383	47.75	136.469	0.015			21		6.75e-06	54.914	49.017	59.606	98.531	0.012			64		8.6e-06	66.268	62.444	69.346	-53.973	0.015
											16		1.32e-05	41.237	36.701	44.333	-45	0.024			22		6.45e-06	52.079	47.133	56	-87.138	0.011			65		6.75e-06	65.983	60.952	69.333	129.094	0.011
											17		1.11e-05	42.123	35.789	49.333	138.504	0.019			23		7.06e-06	47.205	42.434	51.646	92.603	0.012			66		7.37e-06	65.276	61.462	68.687	-52.125	0.013
											18		1.38e-05	44.74	37.689	49.333	-43.152	0.024			24		7.06e-06	46.708	43.939	49.333	-82.235	0.012			67		7.98e-06	64.725	61.804	68.457	121.759	0.014
											19		8.9e-06	46.23	42.75	50.252	136.469	0.015			25		5.22e-06	43.147	39.333	46.667	93.576	0.009			68		5.22e-06	65.739	61.486	71.036	-55.305	0.009
											20		1.04e-05	45.933	42.868	50.587	-43.781	0.018			26		7.98e-06	44.676	41.667	47.387	-87.709	0.014			69		8.9e-06	66.835	63.833	69.333	124.824	0.016
											21		1.38e-05	44.767	40.292	52.212	138.691	0.024			27		7.06e-06	41.838	37.788	45.758	95.194	0.012			70		6.14e-06	66.472	63.483	69.333	-47.121	0.011
											22		1.07e-05	44.229	36.333	49.549	-45	0.019			28		7.98e-06	41.214	37.434	46.987	-85.426	0.014			71		6.14e-06	66.956	64.422	69.2	128.66	0.011
											23		1.11e-05	44.932	36.503	49.611	137.291	0.02			29		4.91e-06	43.729	41.111	46.111	90	0.009			72		9.21e-06	64.517	61.459	68.333	-56.31	0.016
											24		1.14e-05	44.12	39.46	49	-43.877	0.02			30		8.9e-06	42.658	40.184	45.197	-81.573	0.015			73		7.06e-06	66.53	62.189	73.904	125.838	0.012
											25		6.14e-06	40.098	36.109	43.333	143.746	0.01			31		7.98e-06	43.714	40.573	45.333	90	0.014			74		5.53e-06	64.753	60.922	69.333	-49.764	0.009
											26		1.23e-05	39.389	36.897	46.231	-46.042	0.022			32	Mean	7.1e-06	47.751	39.035	57.11	7.01	0.012			75		5.83e-06	66.419	63.481	69.167	123.69	0.01
											27		1.23e-05	39.419	35.637	42.858	136.042	0.022			33	SD	1.42e-06	13.831	10.823	20.198	90.858	0.002			76		6.14e-06	65.629	61.175	70.303	-55.491	0.011
											28		1.35e-05	36.581	30.667	42.583	-40.314	0.024			34	Min	4.91e-06	21.743	18.883	23.496	-88.025	0.008			77		7.37e-06	65.865	63.244	68.672	127.875	0.013
	cown height/mm										29	Mean	1.16e-05	36.663	31.054	42.307	47.135	0.02			35	Max	9.82e-06	77.35	59	110.258	98.531	0.017			78		6.14e-06	64.822	63.333	66.295	-55.491	0.011
Pmx 1	1.46										30	SD	2.09e-06	7.627	8.747	7.561	91.816	0.004			32	Full length (measured along transect)	0.000211	47.481	18.567	109.821	94.181	0.38			79		5.53e-06	66.885	61.783	70.472	130.236	0.009
Pmx 3	1.82										31	Min	6.14e-06	19.669	13	22.667	-46.042	0.01			33	Full length of tooth on slice (from IMG_9215)	0.000506	49.591	11.065	210.224	94.281	0.913			80		5.53e-06	65.342	63.946	67.52	-57.265	0.009
Mx 6	2.22										32	Max	1.54e-05	46.23	42.868	52.212	143.746	0.027											# of von Ebner Lines		81		7.37e-06	66.43	59.033	72.205	124.38	0.013
Mx 7	2.09										29	Full length (measured along transect)	0.000318	36.304	13.609	51.637	-43.041	0.573											31.6667	76.0833	82		4.91e-06	67.716	64.107	70.44	-53.13	0.008
Mx 12	1.59										39	Full length of tooth on slice (from IMG_9215)	0.000559	73.92	45.172	145.268	-114.637	1.009						15.2167	65.2143	6.33333	27.1429	min	22.3529	53.7059	83		3.38e-06	67.079	65	70	130.601	0.005
Mx 12 replacement	0.23																		# of von Ebner Lines						91.3		38	max	47.5	114.125	84		3.99e-06	65.962	63.889	68.333	-55.008	0.007
Mx 13	2.08																		28.65	50.45	9234 central axis, mid region										85		3.99e-06	66.177	64.148	68.111	124.992	0.007
Dent 2	1.65													12.6125	42.0417	7.1625	23.875	min	21.2222	37.3704		Label	Area	Mean	Min	Max	Angle	Length			86		6.14e-06	64.352	62.592	66.63	-53.746	0.01
Dent 4	1.26														63.0625		35.8125	max	57.3	100.9	1		6.14e-06	45.935	41.649	51.65	-55.491	0.011			87		6.45e-06	62.334	58.613	66.347	126.87	0.011
Dent 4 replacement	0.22										9213 root base, side a										2		5.22e-06	42.324	40	48	129.806	0.009			88		9.52e-06	61.903	57.107	64.667	-53.13	0.017
Dent 11	1.52											Label	Area	Mean	Min	Max	Angle	Length			3		8.6e-06	40.845	34.52	48.804	-51.009	0.015			89		9.21e-06	60.878	58.444	64.945	127.694	0.016
Dent 12	2.16										1		8.29e-06	52.372	49.859	55.744	46.548	0.015			4		7.06e-06	46.771	43.036	49.635	125.838	0.012			90		1.23e-05	61.097	57.816	68	-52.253	0.021
Dent 12 replacement	0.95										2		7.37e-06	53.618	52.051	55.491	-131.424	0.013			5		8.6e-06	59.413	47.889	69.123	-48.013	0.015			91		8.6e-06	60.87	54.495	69.764	126.027	0.015
Dent 18	1.89										3		6.75e-06	57.466	53.333	61.218	54.782	0.012			6		9.82e-06	66.756	51.968	88.667	125.754	0.017			92	Mean	7.68e-06	72.442	68.316	76.384	33.3	0.013
Dent 19	1.67										4		7.67e-06	57.028	55.333	59.306	-128.29	0.013			7		7.06e-06	67.438	55.427	88.667	-50.528	0.012			93	SD	1.82e-06	6.56	6.379	7.181	90.321	0.003
											5		1.01e-05	54.374	50.107	59.302	48.814	0.018			8		5.83e-06	65.611	57.617	71.667	132.709	0.01			94	Min	3.38e-06	60.87	54.495	64.667	-57.995	0.005
											6		7.98e-06	51.956	47.333	55.4	-133.363	0.014			9		5.53e-06	70.875	57.722	93.667	-57.265	0.009			95	Max	1.32e-05	88.668	84.105	95.568	130.601	0.023
											7		9.82e-06	48.845	45.667	51.306	51.633	0.017			10		4.6e-06	95.548	89.254	112.333	129.289	0.008			92	Full length (measured along transect)	0.000659	72.851	54.436	101.881	126.32	1.189
											8		4.3e-06	48.56	45.667	51.554	-131.987	0.007			11		7.98e-06	161.02	112.333	198.959	-49.899	0.014			93	Full length of tooth on slice (from IMG_9215)	0.000923	72.537	0	116.947	120.081	1.665
											9		7.98e-06	48.61	45.667	53.507	45	0.014			12		7.06e-06	124.516	90.176	176.127	127.875	0.012											# of von Ebner Lines
											10		6.45e-06	48.581	46.667	51.667	-126.87	0.011			13		6.45e-06	145.088	96.667	189.333	-53.13	0.011											91.4615	128.077
											11		6.75e-06	46.702	44.984	47.921	48.814	0.012			14		7.37e-06	123.262	96.97	157.667	127.875	0.013						38.4231	104.062	27.4385	74.3125	min	51.6957	72.3913
											12		5.53e-06	47.671	46.293	49.161	-130.236	0.009			15		5.83e-06	113.676	94.889	130.889	-47.291	0.01							166.5		118.9	max	237.8	333
											13		1.17e-05	47.304	44.909	49.847	47.203	0.02			16		3.99e-06	115.846	91.778	142.389	124.992	0.007			9253 central axis, lower 2/3
											14		7.37e-06	46.487	43.887	48.539	-127.875	0.013			17		5.53e-06	105.121	81.824	142.118	-47.49	0.009				Label	Area	Mean	Min	Max	Angle	Length
											15	Mean	7.72e-06	50.684	47.983	53.569	-40.518	0.013			18		6.14e-06	99.928	89.889	118.504	124.509	0.011			1		1.04e-05	60.659	57.465	66.075	-54.866	0.018
											16	SD	1.89e-06	3.757	3.547	4.291	92.908	0.003			19		4.6e-06	83.564	70.333	97.333	-48.013	0.008			2		9.21e-06	63.316	60	67.517	123.69	0.016
											17	Min	4.3e-06	46.487	43.887	47.921	-133.363	0.007			20		7.37e-06	113.518	84.117	158.785	124.38	0.012			3		1.14e-05	64.399	60	67.648	-56.31	0.02
											18	Max	1.17e-05	57.466	55.333	61.218	54.782	0.02			21		6.75e-06	84.986	65.063	108.381	-48.814	0.012			4		8.9e-06	65.728	62.23	69.484	123.111	0.015
											15	Full length of transect	0.000104	50.693	43.654	61.657	-131.042	0.187			22		6.14e-06	95.658	70.667	116.894	126.87	0.011			5		7.98e-06	67.075	60.667	70.373	-56.31	0.014
											39	Full length of tooth on slice (from IMG_9215)	0.000559	73.92	45.172	145.268	-114.637	1.009			23		1.11e-05	103.108	83.027	120.122	-50.826	0.019			6		8.9e-06	68.437	64.583	73.778	126.027	0.015
																			# of von Ebner Lines		24		9.82e-06	73.254	40.444	109.624	128.367	0.017			7		8.29e-06	69.939	59.343	81.682	-56.31	0.014
																			14.3846	77.6154	25		1.32e-05	39.266	34.397	48.596	-52.853	0.023			8		8.29e-06	69.293	58.333	83.254	124.287	0.014
														23.2846	63.0625	4.31538	11.6875	min	9.35	50.45	26		8.6e-06	33.044	29.272	37.335	129.289	0.015			9		9.52e-06	68.817	55.333	74.067	-55.784	0.017
															100.9		18.7	max	26.7143	144.143	27		1.14e-05	31.205	27.301	34.805	-51.843	0.02			10		7.67e-06	69.416	68.056	72.63	123.024	0.013
																					28	Mean	7.32e-06	83.243	65.86	104.077	35.003	0.013			11		7.06e-06	70.884	67.523	75.541	-57.724	0.012
																					29	SD	2.23e-06	35.385	24.971	47.577	90.874	0.004			12		7.98e-06	70.761	68.47	73.667	124.992	0.014
													VELW								30	Min	3.99e-06	31.205	27.301	34.805	-57.265	0.007			13		6.14e-06	68.726	65.796	72.772	-57.995	0.01
												Max	0.031								31	Max	1.32e-05	161.02	112.333	198.959	132.709	0.023			14		6.75e-06	67.563	62.679	70.489	129.472	0.012
												Min									28	Full length (measured along transect)	0.000189	79.836	26.255	198.333	-51.602	0.341			15		7.06e-06	68.833	62.1	78.163	-59.931	0.012
												Average									29	Full length of tooth on slice (from IMG_9215)	0.000531	57.533	21.478	198.755	-51.552	0.958			16		7.98e-06	68.78	65.778	71.539	126.87	0.014
																													# of von Ebner Lines		17		8.29e-06	68.643	65.505	72.576	-55.713	0.014
																													26.2308	73.6923	18		7.37e-06	71.481	68.667	75.397	122.276	0.013
																								32.7521	56.3529	11.6581	20.0588	min	14.8261	41.6522	19		7.98e-06	70.318	65.272	74.867	-58.241	0.014
																									106.444		37.8889	max	48.7143	136.857	20		7.06e-06	71.419	67.222	73.95	127.875	0.012
																															21		9.82e-06	73.211	70.957	76.085	-55.784	0.017
																															22		7.98e-06	73.491	70.467	76.851	121.759	0.014
																															23		1.04e-05	71.95	67.926	76.815	-54.866	0.018
																															24		7.06e-06	72.304	69.212	75.299	127.405	0.012
																															25		7.67e-06	74.275	69.667	79.917	-55.008	0.014
																															26		7.06e-06	76.458	73.255	80.333	116.565	0.012
																															27		7.06e-06	78.598	76.388	82	-54.162	0.012
																															28		7.06e-06	78.067	74.427	85.062	127.405	0.012
																															29		8.29e-06	84.483	80.821	87.795	-55.713	0.015
																															30		7.67e-06	85.079	79.333	91.87	123.024	0.013
																															31		1.04e-05	84.897	81.766	89.881	-53.471	0.018
																															32		9.21e-06	84.87	80.924	89.791	122.005	0.016
																															33		7.67e-06	85.042	82.031	87.526	-53.13	0.013
																															34		5.83e-06	86.314	82.889	91.963	116.565	0.01
																															35		8.6e-06	90.928	88	94.154	-52.696	0.015
																															36		8.29e-06	86.567	78.556	91.444	123.69	0.014
																															37		8.9e-06	89.649	87.234	92.624	-56.31	0.016
																															38		7.06e-06	89.108	85.058	93.394	123.69	0.012
																															39		1.14e-05	90.823	86.333	96.235	-55.008	0.02
																															40		7.06e-06	89.823	84.03	93.444	125.838	0.012
																															41		7.37e-06	95.513	92.505	99.667	-55.62	0.013
																															42		7.67e-06	101.107	93.667	116.333	119.745	0.013
																															43		1.04e-05	88.79	78.799	93.667	-52.431	0.018
																															44		1.04e-05	89.578	82.44	97.343	123.69	0.018
																															45		8.9e-06	91.557	88	100.751	-59.744	0.016
																															46		9.52e-06	94.154	86.608	101.822	125.754	0.017
																															47		9.82e-06	87.412	82.806	90.433	-54.246	0.017
																															48		1.04e-05	89.79	85.999	92.596	122.735	0.018
																															49		1.01e-05	91.16	85.778	97.242	-55.305	0.018
																															50		9.82e-06	81.832	76.62	87.072	123.179	0.017
																															51		1.11e-05	75.291	68.959	82.162	-55.408	0.019
																															52		7.06e-06	73.988	72.556	75.532	125.838	0.012
																															53		6.75e-06	73.043	70.05	75.615	-52.595	0.012
																															54		7.67e-06	69.947	58.625	73.611	121.759	0.013
																															55		8.6e-06	71.332	69	77.603	-55.713	0.015
																															56		8.6e-06	69.8	66.062	73.262	127.304	0.015
																															57		7.37e-06	69.191	66.293	72.778	-59.036	0.013
																															58		7.37e-06	68.504	65.152	71.884	124.38	0.013
																															59		9.82e-06	67.701	64.301	71	-55.784	0.017
																															60		8.29e-06	65.939	62.274	69.889	120.579	0.014
																															61		8.6e-06	65.57	59.856	69.889	-55.176	0.015
																															62		8.9e-06	65.954	62.333	68.333	124.824	0.015
																															63		1.23e-05	65.413	60.858	69.897	-56.725	0.021
																															64		1.2e-05	64.69	60.86	69.559	125.362	0.021
																															65		1.11e-05	64.387	60.44	68.693	-56.768	0.019
																															66		1.23e-05	63.766	58.508	70.474	126.573	0.021
																															67		1.17e-05	65.265	59.333	68.189	-56.31	0.02
																															68		1.07e-05	65.836	62	70.473	124.16	0.019
																															69	Mean	8.73e-06	75.69	71.103	80.496	34.107	0.015
																															70	SD	1.58e-06	10.122	10.215	10.992	90.577	0.003
																															71	Min	5.83e-06	60.659	55.333	66.075	-59.931	0.01
																															72	Max	1.23e-05	101.107	93.667	116.333	129.472	0.021
																															69	Full length (measured along transect)	0.000579	75.24	54.303	111.579	124.188	1.044
																															93	Full length of tooth on slice (from IMG_9215)	0.000923	72.537	0	116.947	120.081	1.665
																																							# of von Ebner Lines
																																							69.6	111
																																		27.75	92.5	17.4	58	min	49.7143	79.2857
																																			138.75		87	max	104.4	166.5
																															9243 central axis, crown apical
																																Label	Area	Mean	Min	Max	Angle	Length
																																	1.351e-05	47.353	42	51.453	76.608	0.024
																																	7.674e-06	46.175	42.333	50.25	-104.621	0.013
																																	1.044e-05	48.629	42.333	53.38	79.38	0.018
																																	9.515e-06	54.931	50.573	58.843	-107.241	0.017
																																	8.902e-06	56.43	51.928	60.905	77.471	0.015
																																	1.197e-05	58.664	56.772	60.939	-100.713	0.021
																																	7.06e-06	59.19	57.132	61.855	74.055	0.012
																																	8.288e-06	58.383	55.141	64.064	-100.886	0.015
																																	6.446e-06	57.792	55.083	60.958	75.256	0.011
																																	8.288e-06	57.148	55.317	59.048	-105.642	0.014
																																	9.822e-06	56.856	48.567	59.882	78.69	0.017
																																	1.044e-05	59.572	54.833	63.333	-104.036	0.018
																																	8.902e-06	59.877	56.667	65.003	75.466	0.015
																																	7.981e-06	59.086	56.667	61.333	-101.768	0.014
																																	1.105e-05	59.81	57.282	63.499	78.366	0.019
																																	9.209e-06	59.504	57.402	61.333	-105.945	0.016
																																	1.197e-05	58.306	56.124	61.526	77.8	0.021
																																	1.381e-05	61.098	56.879	64.909	-104.349	0.025
																																	1.013e-05	60.06	51.646	63	77.276	0.018
																																	1.197e-05	60.212	54.965	63.333	-102.2	0.021
																																	1.044e-05	59.756	56.598	65.482	77.661	0.018
																																	9.515e-06	59.428	56.333	61.476	-103.57	0.017
																																	9.515e-06	58.738	55.237	61.267	76.43	0.017
																																	1.044e-05	58.588	51.184	61.735	75.964	0.018
																																	1.136e-05	60.541	54.444	68.694	-104.421	0.02
																																	1.136e-05	61.607	56.361	68	77.125	0.02
																																	8.902e-06	64.607	62.833	68.667	-104.534	0.015
																																	7.674e-06	64.455	60	68.667	77.735	0.013
																																	9.209e-06	58.137	54.441	60.701	-102.095	0.016
																																	1.044e-05	59.154	56.356	62.938	75.964	0.018
																																	9.822e-06	59.802	56.699	62.301	-104.931	0.017
																																	1.166e-05	59.39	56.355	62.847	75.964	0.021
																																	1.136e-05	57.834	52.827	61.299	-102.875	0.02
																																	1.013e-05	61.71	55.25	67.417	75.53	0.018
																																	1.105e-05	62.827	60	65.851	-101.634	0.019
																																	9.822e-06	66.009	62.667	68.798	76.866	0.017
																																	9.209e-06	66.009	58.299	69.466	-105.945	0.016
																																	8.902e-06	63.178	55.822	70.197	77.471	0.015
																																	1.351e-05	58.425	55.597	62.667	-103.392	0.024
																																	1.719e-05	66.232	62.608	70.667	78.486	0.031
																																	8.902e-06	57.235	52.771	65.057	-104.534	0.015
																																	1.013e-05	53.199	50.708	55.74	77.276	0.018
																																	1.259e-05	56.558	54.333	59.396	-104.381	0.022
																																	7.367e-06	52.514	49.667	55	74.745	0.013
																																	1.044e-05	50.781	47.601	54.667	-102.339	0.018
																																	9.822e-06	49.606	45.435	52.7	78.69	0.017
																																	8.902e-06	49.892	46.583	54.52	-106.504	0.016
																																	8.595e-06	48.321	46.333	53	79.509	0.015
																																	9.515e-06	47.999	46.667	49.933	-101.689	0.016
																																	8.902e-06	46.689	39.842	50.107	75.466	0.015
																																	1.074e-05	46.525	43.824	50.751	-103.627	0.019
																																	1.136e-05	47.083	44.667	49.833	77.125	0.02
																																	1.228e-05	47.555	42.578	54.621	-101.889	0.022
																																Mean	1.016e-05	56.971	53.03	60.817	-11.649	0.018	53
																																SD	1.909e-06	5.608	5.713	5.849	91.192	0.003
																																Min	6.446e-06	46.175	39.842	49.833	-107.241	0.011
																																Max	1.719e-05	66.232	62.833	70.667	79.509	0.031
																																Full length (measured along transect)	0.0005298	57.056	38.972	70.514	-103.206	0.955
																																Full length of tooth on slice (from IMG_9215)	0.0009227	72.537	0	116.947	120.081	1.665
																																							# of von Ebner Lines
																																							53.0556	92.5
																																		18.5	79.2857	10.6111	45.4762	min	30.8065	53.7097
																																			111		63.6667	max	86.8182	151.364
[truncated: 65 more columns]

## Sheet: Teeth comparison corr crown h
					tooth age/days
					measurement 1								measurement 2								measurement 3								measurement 4								measurement 5								measurement 6
# of transects		tooth length/mm	central axis height/mm	average incremental line width	mean	min	max	SD±	Age according to tooth length (from mean incremental line width)	Age according to central axis height in slice (from specific incremental line width)	SD±	Age according to central axis height (from mean incremental line width)	mean	min	max	SD±	Age according to tooth length (from mean incremental line width)	Age according to central axis height in slice (from specific incremental line width)	SD±	Age according to central axis height (from mean incremental line width)	mean	min	max	SD±	Age according to tooth length (from mean incremental line width)	Age according to central axis height in slice (from specific incremental line width)	SD±	Age according to central axis height (from mean incremental line width)	mean	min	max	SD±	Age according to tooth length (from mean incremental line width)	Age according to central axis height in slice (from specific incremental line width)	SD±	Age according to central axis height (from mean incremental line width)	mean	min	max	SD±	Age according to tooth length (from mean incremental line width)	Age according to central axis height in slice (from specific incremental line width)	SD±	Age according to central axis height (from mean incremental line width)	mean	min	max	SD±	Age according to tooth length (from mean incremental line width)
	Pmx 1
3	Pmx 3	4.9228	1.7928	0.0166667	38.5882	21.1613	65.6	15.1385	289.576	59.3529	23.2846	105.459	28.65	21.2222	57.3	7.1625	246.14	50.45	12.6125	89.64	14.3846	9.35	26.7143	4.31538	378.677	77.6154	23.2846	137.908
3	Mx 6	4.0428	2.1928	0.0126667	30.3077	23.1765	43.7778	5.51049	310.985	71.7692	13.049	168.677	31.6667	22.3529	47.5	6.33333	336.9	76.0833	15.2167	182.733	26.2308	14.8261	48.7143	11.6581	310.985	73.6923	32.7521	168.677
3	Mx 7	4.0528	2.0628	0.0153333	91.4615	51.6957	237.8	27.4385	311.754	128.077	38.4231	158.677	69.6	49.7143	104.4	17.4	270.187	111	27.75	137.52	53.0556	30.8065	86.8182	10.6111	225.156	92.5	18.5	114.6
1	Mx 12	4.5628	1.5628	0.012	26.25	15.75	45	8.75	380.233	40.9167	13.6389	130.233
2	Mx 12 replacement	0.3628	0.2028	0.0115	28.7273	21.0667	45.1429	6.38384	32.9818	28.7273	6.38384	18.4364	26.25	15.75	45	8.75	30.2333	40.9167	13.6389	16.9
3	Mx 13	3.8828	2.0528	0.0116667	84	38.5	184.8	31.5	352.982	101.364	38.0114	186.618	95.7273	55.4211	150.429	21.2727	352.982	101.636	22.5859	186.618	78.3846	37.7407	145.571	34.8376	298.677	87.6154	38.9402	157.908
3	Dent 2	2.1728	1.6228	0.0133333	84.2727	51.5	132.429	18.7273	197.527	95.0909	21.1313	147.527	41.8125	29.087	95.5714	9.64904	135.8	60.4375	13.9471	101.425	66.7692	34.72	124	29.6752	167.138	78.5385	34.906	124.831
3	Dent 4	3.7528	1.2328	0.0175	63.3158	41.4828	120.3	22.6128	197.516	87.2105	31.1466	64.8842	98.7692	53.5	256.8	43.8974	288.677	127.462	56.6496	94.8308	35.4146	23.0476	69.1429	12.9854	183.063	80.8293	29.6374	60.1366
! Seems longer in the picture than in the CT?	Dent 4 replacement	0.3628	0.1928	0.012	36.3077	26.2222	59	10.8923	27.9077	79.5385	23.8615	14.8308	26.6364	18.3125	48.8333	9.98864	32.9818	94.1818	35.3182	17.5273
Dent 4 replacement	Dent 11	3.8828	1.4928
2	Dent 11 replacement	0.4528	0.2828
5	Dent 12	3.5628	2.1328	0.0144	115.143	71.6444	214.933	31.4026	254.486	119	32.4545	152.343	91.0625	53.963	171.412	35.6332	222.675	104.125	40.7446	133.3	122.222	75	235.714	42.7778	263.911	122.519	42.8815	157.985	126.143	72.0816	220.75	50.4571	254.486	127.071	50.8286	152.343	110.207	63.92	168.211	35.0658	245.71	122.69	39.0376	147.09
4	Dent 12 replacement	1.6128	0.9228	0.013	55.3846	30	102.857	16.6154	124.062	58	17.4	70.9846	51.8571	33	90.75	14.1429	115.2	56.4286	15.3896	65.9143	56.4167	29.4348	96.7143	18.8056	134.4	65.5833	21.8611	76.9	54.8462	33.9524	118.833	16.4538	124.062	59.9231	17.9769	70.9846
4	Dent 18	3.3828	1.8628	0.0145	51	30.6	95.625	18.5455	225.52	81	29.4545	124.187	58.3077	36.0952	94.75	17.4923	260.215	92.6923	27.8077	143.292	44	34	74.8	9.42857	198.988	70.1176	15.0252	109.576	57.9231	35.8571	107.571	17.3769	260.215	92.2308	27.6692	143.292
4	Dent 19	3.4828	1.6428	0.0125	51.8333	32.7368	88.8571	17.2778	290.233	75.5833	25.1944	136.9	26.8333	18.9412	53.6667	5.36667	290.233	78.0833	15.6167	136.9	55.6923	32.9091	90.5	16.7077	267.908	72.8462	21.8538	126.369	54	35.1	117	16.2	267.908	73	21.9	126.369
40			average:	0.0136205
	Base to apex				SD±	(Full length/Mean incremental line width)+-(Full length/(Mean incremental line width+-SD))
	At base of crown
	Mid crown
	Near crown apex
	Root base
	Mid root
	Root apex
	Based on partal or estimated full length
[truncated: 69 more columns]
