# Supplementary material for: Sampling impacts the assessment of tooth growth and replacement rates in archosaurs: implications for paleontological studies
Source: PeerJ. 2020 Sep 18;8:e9918. doi: 10.7717/peerj.9918 (PMC7505082; doi:10.7717/peerj.9918)
Supplement: Supplemental Information 6 — The raw measurements of von Ebener line increment widths (VEIWs) are provided in Data S2, S3, and S4. The data shows all measured transects and next to the name of the picture file it was measured from the position of the transect within the tooth. On a second sheet in each of these files tooth formation times (TFT) are calculated for scenarios using CAH, TH and transect length for each transect. [file peerj-08-9918-s006.xlsx]

## Sheet: Teeth basic data corr crown h
	Pmx 1									Pmx 3									Pmx 3 replacement									Mx 6									Mx 6 replacement									Mx 7
	8069 Upper mid crown, measured perpendicular to crown center									8078 crown base (partial)									8074 crown base to apex									8091 base of root									8095 crown base to apex									8099 mid of root
		Label	Area	Mean	Min	Max	Angle	Length (Distance between mid of Von Ebner lines)			Label	Area	Mean	Min	Max	Angle	Length				Area	Mean	Min	Max	Angle	Length			Label	Area	Mean	Min	Max	Angle	Length			Label	Area	Mean	Min	Max	Angle	Length			Label	Area	Mean
	1		1.07e-05	105.24	83.261	136.444	-103.627	0.019		1		1.2e-05	124.693	109	144.937	73.009	0.021		1		Tooth length					1.087		1		1.5e-05	84.753	43.134	109.463	174.053	0.026		1		3.93e-05	57.511	45.443	68.111	-116.162	0.07		1		6.45e-06	67.341
	2		1.32e-05	94.617	81.259	113.109	67.694	0.023		2		1.38e-05	124.931	101.38	148.49	-107.199	0.024		2		1.38e-05	38.433	31.606	44.795	-1.302	0.024		2		5.53e-06	106.272	101.481	109.969	0	0.009		2		3.41e-05	66.598	61.968	71.834	60.642	0.061		2		8.29e-06	83.113
	3		1.75e-05	101.586	61.667	128	-107.784	0.031		3		1.04e-05	140.376	117.328	168.102	74.291	0.018		3		1.44e-05	39.196	35.449	43.696	178.755	0.025		3		6.45e-06	101.315	91.333	109	174.289	0.011		3		2.82e-05	73.518	67.369	78.675	-116.003	0.051		3		1.07e-05	93.005
	4		1.32e-05	89.11	61.667	102.81	71.565	0.023		4		7.37e-06	133.539	122.285	150.974	-107.65	0.013		4		1.01e-05	43.477	35.333	49.083	-1.79	0.018		4		4.6e-06	108.432	94.762	119.429	0	0.008		4		2.82e-05	77.506	71.912	84.205	61.189	0.051		4		1.01e-05	95.388
	5		9.82e-06	96.32	84.4	111.986	-107.241	0.017		5		7.06e-06	138.276	122.667	166.57	74.055	0.012		5		1.26e-05	45.364	35.333	50.667	177.138	0.022		5		6.14e-06	109.409	104.468	114.445	174.289	0.011		5		1.75e-05	82.42	78.524	86.381	-111.038	0.031		5		7.37e-06	98.703
	6		8.6e-06	100.639	82.117	128.446	72.897	0.015		6		8.29e-06	129.367	117.854	137.264	-105.642	0.014		6		1.97e-05	54.133	38	69.37	-1.818	0.035		6		4.91e-06	111.39	101.667	119.055	-4.086	0.008		6		2.27e-05	82.151	78.33	86.667	64.134	0.041		6		4.3e-06	99.721
	7		8.29e-06	102.129	72.681	128.926	-105.642	0.014		7		6.14e-06	137.631	128.667	146.832	71.565	0.011		7		1.47e-05	47.834	42.149	57.333	178.781	0.026		7		8.29e-06	104.763	95.513	113.658	173.418	0.014		7		1.97e-05	84.787	78.296	91.148	-116.565	0.035		7		5.83e-06	101.415
	8	Mean	1.16e-05	98.52	75.293	121.389	-30.305	0.02		8		4.91e-06	137.773	127.36	143.822	-105.945	0.008		8		8.9e-06	65.368	54.333	76.667	0	0.016		8		5.83e-06	97.099	91.444	103.333	-6.34	0.01		8		1.57e-05	88.654	85.625	91.596	61.39	0.028		8		7.37e-06	128.968
	9	SD	3.26e-06	5.488	10.056	12.105	94.522	0.006		9		6.45e-06	149.99	132.193	174.383	75.964	0.011		9		1.26e-05	57.546	42	69	178.568	0.022		9		4.3e-06	103.296	97.333	118.225	180	0.007		9		1.23e-05	89.908	84.974	93	-113.962	0.022		9		4.91e-06	132.488
	10	Min	8.29e-06	89.11	61.667	102.81	-107.784	0.014		10		5.22e-06	141.948	118.406	171.146	-108.435	0.009		10		1.35e-05	47.036	38.667	55.264	-2.663	0.024		10		7.37e-06	105.603	99.506	111.424	-4.97	0.013		10		1.47e-05	91.639	87.144	95.352	62.354	0.026		10		4.3e-06	142.259
	11	Max	1.75e-05	105.24	84.4	136.444	72.897	0.031		11		4.91e-06	132.677	113.96	147.96	70.346	0.008		11		1.2e-05	44.006	38.667	47.789	176.987	0.021		11		9.82e-06	100.928	93.216	110.222	176.309	0.017		11		2.49e-05	90.716	85.107	95.267	-116.565	0.045		11		4.91e-06	141.969
	1	Full length	0.000234	105.987	53.487	249.636	-104.256	0.421		12		5.53e-06	125.32	104.367	144.391	-104.036	0.009		12		1.78e-05	39.054	33.667	47.263	-1.005	0.032		12		7.37e-06	103.98	94.773	112.338	-2.386	0.013		12	Mean	2.34e-05	80.492	74.972	85.658	-34.599	0.042		12		3.68e-06	160.147
									# of von Ebner Lines	13		4.91e-06	127.657	109.667	140.302	75.069	0.008		13		1.35e-05	97.429	40.667	132.76	178.668	0.024		13		4.6e-06	106.49	88.667	113.116	175.914	0.008		13	SD	8.51e-06	10.898	12.679	9.258	92.448	0.015		13		3.68e-06	158.41
					for crown height			average	21.05	14		6.45e-06	115.944	102.911	133.544	-110.225	0.011		20	Mean	1.36333e-05	51.573	38.8226	61.9739	88.3599	0.0241		14		7.67e-06	99.174	87.833	109.139	-4.764	0.013		14	Min	1.23e-05	57.511	45.443	68.111	-116.565	0.022		14		7.98e-06	148.841
				28.2404	94.1346	4.85769	16.1923	min	30.0714	15		8.6e-06	103.107	87.508	112.903	79.114	0.015		21	SD	2.82322e-06	15.8477	5.6292	23.696	89.7931	0.0051		15		4.3e-06	98.557	92.667	102.94	171.254	0.007		15	Max	3.93e-05	91.639	87.144	95.352	64.134	0.07		15		3.38e-06	164.588
					174.821		30.0714	max	13.5806	16		4.6e-06	97.11	86.952	103.037	-109.654	0.008		22	Min	8.9e-06	38.433	31.606	43.696	-2.663	0.016		16		8.29e-06	99.698	90.462	106.915	-4.399	0.014			Full Distance	0.000683	82.289	44.459	96.196	63.043	1.232		16		7.06e-06	163.864
	8069 Upper mid crown, measured down to crown base									17		4.91e-06	80.886	63.778	102.852	70.346	0.008		23	Max	1.97e-05	97.429	54.333	132.76	178.781	0.035		17		3.68e-06	94.359	89.261	98.821	174.806	0.006										# of von Ebner Lines	17		3.99e-06	150.303
		Label	Area	Mean	Min	Max	Angle	Length		18		8.29e-06	79.15	63.778	89.163	-106.26	0.014			Full distance						1.0087		18		6.75e-06	87.666	71.556	95	-2.603	0.012						for crown height				29.3333	18		5.83e-06	139.772
	1		1.965e-05	93.697	68.857	140.047	-152.622	0.035		19	Mean	7.21e-06	123.354	107.226	140.371	-16.738	0.012										# of von Ebner Lines	19	ful length	0.000154	88.474	27.755	120.257	-4.249	0.277					12.8734	23.8158	7.7193	21.614	min	17.6	19		4.3e-06	154.663
	2		1.197e-05	85.84	77	98	24.567	0.021		20	SD	2.64e-06	20.5	20.269	24.399	93.143	0.005						for crown height				41.8548		Mean	6.72e-06	101.288	90.5042	109.805	85.8213	0.0115						50.2778		45.6296	max	56	20		4.6e-06	157.452
	3		1.504e-05	106.992	86.457	137.667	-151.294	0.027		21	Min	4.6e-06	79.15	63.778	89.163	-110.225	0.008					7.51897	35.5308	7.31025	34.5445	min	28.82		SD	2.6e-06	6.88001	13.4533	6.4294	89.131	0.00457347											21	Mean	5.96e-06	129.121
	4		1.872e-05	162.37	128.031	200.68	27.848	0.033		22	Max	1.38e-05	149.99	132.193	174.383	79.114	0.024						54.6053		53.0895	max	63.0437		Min	3.684e-06	84.753	43.134	95	-6.34	0.006											22	SD	2.16e-06	30.757
	5		1.75e-05	128.939	102.122	162.228	-152.526	0.031																					Max	1.504e-05	111.39	104.468	119.429	180	0.026											23	Min	3.38e-06	67.341
	6		1.75e-05	161.793	107.24	194.463	27.474	0.031										# of von Ebner Lines	8075 base to apex																	# of von Ebner Lines										24	Max	1.07e-05	164.588
	7		1.842e-05	183.374	135.796	217.635	-152.56	0.032												Label	Area	Mean	Min	Max	Angle	Length						for crown height				24.087										21	full length	0.000217	91.214
	8		1.78e-05	196.376	177.449	213.645	31.477	0.032									min		1		8.29e-06	65.501	56.282	79.667	-2.203	0.014					82.0823	206.396	6.85359	17.2334	min	10.6538
	9		1.473e-05	199.981	177.492	212.248	-153.435	0.026									max		2		1.2e-05	71.555	64.874	79.167	178.493	0.021						478.956		39.9912	max	46.1667
	10		1.504e-05	194.095	141.333	209.984	21.801	0.027		8080 crown base, side a									3		1.41e-05	68.897	65	72.204	-1.273	0.025																							66.2143
	11		1.658e-05	155.246	127.105	175.599	-149.589	0.03			Label	Area	Mean	Min	Max	Angle	Length		4		9.52e-06	70.229	67.889	72	180	0.017											8095 crown base to apex (measurement 2)
	12		1.473e-05	140.077	110.973	160.178	24.944	0.026		1		1.14e-05	141.501	102	175.895	63.435	0.02		5		8.6e-06	73.638	64.667	78.15	-2.045	0.015											1		2.947e-05	100.57	58.103	176.279	-114.692	0.053
	13		1.995e-05	158.196	121.104	181.604	-150.255	0.036		2		1.04e-05	117.47	96.852	162.025	-115.017	0.018		6		1.2e-05	70.612	64.667	78.368	178.493	0.021											2		2.732e-05	91.613	60.848	166.778	61.966	0.049
	14		1.78e-05	151.013	127.032	177.31	26.114	0.031		3		1.29e-05	115.08	96.852	147.571	60.945	0.023		7		1.29e-05	85.001	78.333	94.461	-2.793	0.023											3		1.842e-05	136.509	77.667	183.574	-118.301	0.033
	15		1.596e-05	132.604	112.389	156.426	-153.435	0.028		4		1.9e-05	107.764	96.987	120.815	-117.408	0.034		8		1.66e-05	75.318	67.444	89.643	178.919	0.03											4		2.118e-05	123.767	77.667	183.667	63.812	0.037
	16		1.443e-05	146.25	112.754	175.474	28.811	0.025		5		1.2e-05	105.244	90.914	120.426	62.103	0.021		9		1.6e-05	101.725	81.889	113.537	-1.123	0.028											5		1.934e-05	132.014	74.667	213.785	-115.741	0.034
	17		1.596e-05	129.994	99.333	156.021	-151.928	0.028		6		8.6e-06	105.729	86.546	129.699	-116.565	0.015		10		1.6e-05	90.632	80.172	101.441	177.754	0.028											6		1.504e-05	128.865	74.667	192	60.255	0.027
	18		1.166e-05	121.521	99.333	144.768	25.866	0.02		7		9.21e-06	102.48	94.333	113.8	63.435	0.016		11		1.69e-05	75.364	69.333	84.049	-1.061	0.03											7		1.289e-05	143.136	97.075	232.139	-114.677	0.023
	19		1.596e-05	90.182	73.6	107.702	-150.945	0.029		8		5.83e-06	111.087	100.939	131.132	-113.629	0.01		12		1.41e-05	75.652	64.922	103.867	178.727	0.025											8		1.535e-05	158.753	129.986	246	61.858	0.027
	20		1.934e-05	126.506	93	160.315	27.801	0.034		9		8.6e-06	104.705	94	114.425	59.744	0.015		13		1.32e-05	142.795	100.333	172.19	-1.364	0.023											9		2.486e-05	154.978	133.801	246	-116.887	0.044
	21		1.842e-05	144.693	113.156	171.15	-154.747	0.032		10		1.11e-05	101.226	86.252	122.889	-117.3	0.019		14		1.41e-05	124.779	110.008	136.759	178.727	0.025											10		1.965e-05	145.062	118.333	237	62.622	0.035
	22		2.21e-05	123.268	103.192	170	29.445	0.039		11		1.35e-05	93.554	77.192	134.114	65.225	0.024		15		1.57e-05	128.183	106.941	151.222	-1.146	0.028											11		1.872e-05	145.907	105	191	-115.71	0.033
	23		1.872e-05	112.944	98.087	134.627	-153.435	0.033		12		8.6e-06	87.465	77.441	103.373	-120.256	0.015		16		1.29e-05	127.235	109.302	149.604	177.207	0.023											12		3.285e-05	118.968	100.529	137.348	62.949	0.058
	24	Mean	1.687e-05	141.128	112.732	167.729	-66.549	0.03		13		1.04e-05	86.732	72.667	101.444	64.231	0.018		17		1.78e-05	139.024	120.772	148.552	-1.975	0.032											13		1.197e-05	149.522	118	187.536	-118.61	0.021
	25	SD	2.525e-06	32.847	27.856	32.161	91.527	0.005		14		1.07e-05	62.241	54.059	72.667	-117.3	0.019		18		1.44e-05	112.446	102.493	123.333	-178.755	0.025											14		1.719e-05	141.879	81	179.139	64.359	0.031
	26	Min	1.166e-05	85.84	68.857	98	-154.747	0.02		MEAN		1.09e-05	103.02	87.6453	125.02	-27.0255	0.0191		19		1.97e-05	139.461	122	152.717	-1.818	0.035											15		2.701e-05	143.151	81	201.177	-118.034	0.048
	27	Max	2.21e-05	199.981	177.492	217.635	31.477	0.039		SD		2.97e-06	17.3226	12.8294	24.8637	89.7758	0.0054		20	Mean	1.39e-05	96.739	84.07	109.523	64.882	0.025											16	Mean	2.075e-05	134.313	92.556	198.228	-32.989	0.037
	24	Full Length	0.0006664	126.759	68.234	242.709	-152.585	1.202		Min		5.83e-06	62.241	54.059	72.667	-120.256	0.01		21	SD	3.03e-06	28.432	21.927	32.954	107.242	0.005											17	SD	6.255e-06	19.025	24.195	31.216	92.512	0.011
									# of von Ebner Lines	Max		1.9e-05	141.501	102	175.895	65.225	0.034		22	Min	8.29e-06	65.501	56.282	72	-178.755	0.014											18	Min	1.197e-05	91.613	58.103	137.348	-118.61	0.021
					for crown height				40.0667	15	Full distance	0.000358	94.116	29.572	202.948	-117.026	0.646		23	Max	1.97e-05	142.795	122	172.19	180	0.035											19	Max	3.285e-05	158.753	133.801	246	64.359	0.058
				11.6548	69.9286	5.72381	34.3429	min	30.8205									# of von Ebner Lines		Full length						1.109											16	Full Distance (transect)	0.0002787	140.814	81	238.794	63.068	0.503
					97.9		48.08	max	60.1					for crown height				33.822									# of von Ebner Lines														for crown height				# of von Ebner Lines
	cown height/mm												34.0132	120.306	7.45464	26.3673	min	19					for crown height				44.36																		13.5946
Pmx 1	2.4475													215.146		47.1533	max	64.6				6.91667	34.5833	7.39333	36.9667	min	31.6857												15.5223	28.2812	36.6892	5.75156	10.4792	min	8.67241
Pmx 3	2.9475																						51.875		55.45	max	79.2143													52.2115			19.3462	max	23.9524
Pmx 3 replacement	1.0375
Mx 6	3.3175
Mx 6 replacement	1.3575
Mx 7	2.3175
Mx 12	3.0175
Mx 13	2.8175
Mx 13 replacement	1.1075
Dent 2	2.3875
Dent 2 replacement	0.4275
Dent 4	2.6575
Dent 11	1.6675
Dent 11 replacement	0.3275
Dent 12	2.7975
Dent 18	2.4875
Dent 19	2.5875
Dent 19 replacement	0.5175
[truncated: 101 more columns]

## Sheet: Teeth comparison corr crown h
					tooth age/days
					measurement 1						measurement 2						measurement 3						measurement 4						measurement 5						measurement 6						measurement 7						measurement 8
# of transects		tooth length/mm	central axis height/mm	average incremental line width	mean	min	max	SD±	Age according to tooth length (from mean incremental line width)	Age according to central axis height (from mean incremental line width)	mean	min	max	SD±	Age according to tooth length (from mean incremental line width)	Age according to central axis height (from mean incremental line width)	mean	min	max	SD±	Age according to tooth length (from mean incremental line width)	Age according to central axis height (from mean incremental line width)	mean	min	max	SD±	Age according to tooth length (from mean incremental line width)	Age according to central axis height (from mean incremental line width)	mean	min	max	SD±	Age according to tooth length (from mean incremental line width)	Age according to central axis height (from mean incremental line width)	mean	min	max	SD±	Age according to tooth length (from mean incremental line width)	Age according to central axis height (from mean incremental line width)	mean	min	max	SD±	Age according to tooth length (from mean incremental line width)	Age according to central axis height (from mean incremental line width)	mean	min	max
2	Pmx 1	5.7075	2.4475	0.025	21.05	13.5806	30.0714	4.85769	285.375	122.375	40.0667	30.8205	60.1	5.72381	190.25	81.5833
1	Pmx 3	9.0275	2.9475	0.01555							33.822	19	64.6	7.45464	472.644	154.319
2	Pmx 3 replacement	3.0175	1.0375	0.02455	41.8548	28.82	63.0437	7.45464	125.207	43.0498	44.36	31.6857	79.2143	7.39333	120.7	41.5
1	Mx 6	9.6375	3.3175	0.0115	24.087	10.6538	46.1667	6.85359	838.043	288.478
1	Mx 6 replacement	3.1275	1.3575	0.037	13.5946	8.67241	23.9524	5.75156	84.527	36.6892
1	Mx 7	8.2475	2.3175	0.01	39.2	20.6316	65.3333	11.2	824.75	231.75
3	Mx 12	8.6975	3.0175	0.011	41.5556	26.7143	74.8	7.55556	966.389	335.278	34.5833	24.4118	51.875	4.94048	724.792	251.458	16.4167	9.85	39.4	4.82843	724.792	251.458
2	Mx 13	7.4375	2.8175	0.0135	21.9286	13.3478	30.7	4.87302	531.25	201.25	22.3846	17.1176	32.3333	4.19712	572.115	216.731
3	Mx 13 replacement	2.0675	1.1075	0.0153333	25.9231	16.0476	42.125	7.20085	159.038	85.1923	22.4615	16.2222	29.2	2.99487	159.038	85.1923	15.95	11.3929	22.7857	2.65833	103.375	55.375
1	Dent 2	8.1275	2.3875	0.008	11.25	9	18	2.25	1015.94	298.438
1	Dent 2 replacement	1.7175	0.4275	0.005	10.2	7.28571	17	2.91429	343.5	85.5
1	Dent 4	11.1275	2.6575	0.014	20.4286	9.22581	47.6667	6.80952	794.821	189.821
4	Dent 11	5.5675	1.6675	0.0115	49.75	37.3125	85.2857	7.10714	463.958	138.958	57	31.6667	81.4286	13.1538	556.75	166.75	55.9	31.0556	79.8571	12.9	556.75	166.75	30.5	21.35	42.7	5.38235	397.679	119.107
1	Dent 11 replacement	0.7575	0.3275	0.0229939	15.6957	9.13924	21.8788	11.8361	32.9435	14.2429
3	Dent 12	8.5575	2.7975	0.0143333	27.8824	15.2903	47.4	6.3369	503.382	164.559	36.9286	2.09	51.7	6.51681	611.25	199.821	35.3333	23.5556	60.5714	8.83333	713.125	233.125
12	Dent 18	6.1175	2.4875	0.0145	35.4	22.125	50.5714	5.9	611.75	248.75	38.8182	21.35	71.1667	10.3515	556.136	226.136	23.5	17.9048	34.1818	3.71053	382.344	155.469	23.8571	15.9048	41.75	5.30159	436.964	177.679	29.2727	21.4667	40.25	4.5035	556.136	226.136	32.3636	17.8	71.2	6.93506	556.136	226.136	33.1333	18.4074	49.7	8.28333	407.833	165.833	32.4	14.2941	60.75
7	Dent 19	6.0475	2.5875	0.00942857	48.4	25.4737	80.6667	16.1333	604.75	258.75	51.625	24.2941	82.6	14.0795	755.938	323.438	49.7778	37.3333	74.6667	12.4444	671.944	287.5	45.7778	31.6923	82.4	8.32323	671.944	287.5	54.75	43.8	73	6.08333	755.938	323.438	44.3636	27.1111	97.6	9.50649	549.773	235.227	42.8182	27.7059	78.5	6.58741	549.773	235.227
2	Dent 19 replacement	0.9075	0.5175	0.024	33.7917	23.8529	50.6875	5.82615	37.8125	21.5625	33.625	27.8276	53.8	3.73611	0.024	21.5625
48			average	0.015955
	Base to apex				SD±	(Full length/Mean incremental line width)+-(Full length/(Mean incremental line width+-SD))
	Near crown apex
	Mid crown
	At base of crown
	Root base
	Mid root
	Root apex
	Based on partal or estimated full length
[truncated: 40 more columns]
