# Supplementary material for: Sampling impacts the assessment of tooth growth and replacement rates in archosaurs: implications for paleontological studies
Source: PeerJ. 2020 Sep 18;8:e9918. doi: 10.7717/peerj.9918 (PMC7505082; doi:10.7717/peerj.9918)
Supplement: Supplemental Information 7 — The raw measurements of von Ebener line increment widths (VEIWs) are provided in Data S2, S3, and S4. The data shows all measured transects and next to the name of the picture file it was measured from the position of the transect within the tooth. On a second sheet in each of these files tooth formation times (TFT) are calculated for scenarios using CAH, TH and transect length for each transect. [file peerj-08-9918-s007.xlsx]

## Sheet: Teeth basic data corr crown h
	Pmx 1	no von Ebner lines visible?									Pmx 3										Mx 6											Mx 6 replacement										Mx 7
	7835 central axis, upper mid crown										7905 perpendicular to root sides, upper root side a										7935 central axis, crown base											7875 central axis, complete, oblique slice?										7905 mid crown
		Label	Area	Mean	Min	Max	Angle	Length				Label	Area	Mean	Min	Max	Angle	Length				Label	Area	Mean	Min	Max	Angle	Length					Label	Area	Mean	Min	Max	Angle	Length				Label	Area	Mean	Min	Max	Angle	Length
	1		5.218e-06	178.81	124.222	228.333	-97.125	0.009			1		8.6e-06	133.944	94.444	163.351	141.009	0.015			1		1.01e-05	67.397	63.333	72.354	-81.119	0.018				1		7.98e-06	61.373	49.733	71.667	-83.418	0.014			1		8.9e-06	200.761	186.889	227.122	47.862	0.016
	2		5.525e-06	191.382	152.173	228.333	86.634	0.009			2		1.17e-05	130.502	99.717	185.37	-43.919	0.021			2		8.9e-06	69.463	65.881	73.667	94.086	0.016				2		5.22e-06	70.786	61.556	75.056	93.576	0.009			2		7.06e-06	194.99	178.424	228.426	-125.838	0.012
	3		6.446e-06	167.99	121.422	217.444	-95.711	0.011			3		5.22e-06	168.561	155.234	185.37	135	0.009			3		1.32e-05	64.888	57.833	69.19	-80.311	0.023				3		6.14e-06	68.393	60.848	74.963	-86.987	0.011			3		6.14e-06	183.057	174.588	191.825	51.34	0.011
	4		7.674e-06	158.946	139.083	180.565	82.875	0.013			4		5.53e-06	153.515	129.741	173.471	132.709	0.009			4		1.14e-05	58.184	53.918	61.502	99.462	0.02				4		6.14e-06	68.078	61.132	75.647	93.013	0.011			4		7.06e-06	185.134	179	188.292	-125.838	0.012
	5		6.446e-06	151.247	105.722	192.622	-95.711	0.011			5		5.53e-06	119.633	107.333	131.331	-45	0.01			5		1.17e-05	58.931	54.55	62.703	-83.83	0.021				5		3.38e-06	70.411	69.333	71.37	-90	0.006			5		8.9e-06	203.391	184.667	244.7	52.306	0.015
	6		6.753e-06	131.58	119.111	135.731	84.289	0.012			6		4.91e-06	103.944	92.078	116.212	137.726	0.008			6		1.26e-05	58.382	55.508	60.991	102.995	0.022				6		5.22e-06	68.616	64.269	74.241	97.125	0.009			6		1.47e-05	202.803	185.966	230.776	-123.69	0.026
	7		6.753e-06	132.577	117.062	172.593	-98.13	0.012			7		5.53e-06	112.06	96.795	145.778	-42.709	0.01			7		7.06e-06	57.829	56.333	59.03	-84.806	0.012				7		4.91e-06	67.629	63.188	70.823	-86.186	0.008			7		6.14e-06	199.29	194.932	217.705	42.879	0.011
	8		6.139e-06	137.65	122.696	189.766	90	0.01			8		7.98e-06	168.294	146.628	193.814	133.363	0.014			8		8.9e-06	56.791	52.667	61.298	96.116	0.016				8		4.3e-06	78.339	70.037	82.384	94.399	0.007			8		1.11e-05	218.365	198.197	236.483	-123.232	0.019
	9		1.013e-05	146.729	108.667	188.353	-97.352	0.018			9		5.83e-06	156.444	128.594	180	-38.157	0.01			9		9.21e-06	63.406	57.209	73.708	-77.905	0.016				9		6.75e-06	77.208	72.83	85.61	-87.274	0.011			9		1.32e-05	222.798	196.167	246.869	53.673	0.023
	10		1.044e-05	149.352	120.33	228.837	84.806	0.018			10		7.06e-06	165.113	153.189	184.778	133.152	0.012			10		9.21e-06	67.457	63.264	71.586	99.782	0.016				10		5.83e-06	82.897	75.519	92.136	96.34	0.01			10		6.14e-06	202.119	189.746	211.175	-122.005	0.01
	11		4.911e-06	138.001	112.897	170.582	-94.086	0.008			11		8.29e-06	167.962	141.293	183.477	-40.101	0.014			11		7.06e-06	68.747	63.788	77.333	-84.806	0.012				11		6.45e-06	86.186	78.148	95.326	-87.138	0.011			11		9.52e-06	207.229	190	234.941	48.991	0.017
	12		7.981e-06	167.936	135.458	217.192	85.426	0.014			12		4.6e-06	168.616	154.757	184.111	135	0.008			12		7.67e-06	78.518	74.542	83.708	97.125	0.013				12		6.75e-06	91.069	75.626	104.469	95.44	0.012			12		8.29e-06	208.015	195.27	232.803	-128.66	0.014
	13		6.753e-06	165.579	128.515	199.596	-98.13	0.012			13		7.37e-06	154.685	135.87	170.338	-43.264	0.013			13		1.47e-05	90.707	74.667	105.333	-78.93	0.026				13		6.75e-06	92.762	82.075	100.33	-90	0.012			13		6.45e-06	206.002	183.667	225.833	59.534	0.011
	14		8.902e-06	164.752	114.477	226.458	83.884	0.015			14		4.6e-06	166.064	161.841	170.222	137.726	0.008			14		1.17e-05	105.785	101.306	114.333	97.696	0.021				14		6.45e-06	91.606	81.267	100.022	95.711	0.011			14		1.41e-05	208.955	167.342	243.486	-128.66	0.025
	15		5.525e-06	146.945	116.543	189.407	-93.366	0.01			15		7.06e-06	174.613	162.414	187	-39.472	0.012			15		1.11e-05	146.147	114.333	169.001	-79.992	0.019				15		7.98e-06	93.13	84.725	100.971	-85.426	0.014			15		6.75e-06	196.357	185.782	211.333	52.595	0.012
	16		1.259e-05	175.608	122.144	228.244	84.289	0.022			16		5.83e-06	165.496	144.534	220.296	141.843	0.01			16		8.29e-06	156.933	140.795	162.487	98.746	0.015				16		5.22e-06	98.622	91.111	111.556	97.125	0.009			16		7.98e-06	193.718	172.949	212.714	-130.101	0.014
	17		8.288e-06	174.737	131.094	226.556	-94.399	0.014			17		7.37e-06	174.322	149.904	220.296	-55.62	0.012			17		8.29e-06	165.409	157	176.333	-81.254	0.015				17		6.75e-06	107.947	103.074	114.078	-87.274	0.012			17		1.26e-05	183.971	172.333	201.406	55.125	0.022
	18		6.446e-06	190.404	154.533	232.2	87.138	0.011			18		6.14e-06	172.494	154.339	186.497	139.399	0.01			18		9.82e-06	165.434	153.527	184.763	95.528	0.017				18		7.06e-06	101.3	90.017	108.444	92.603	0.012			18		1.32e-05	179.057	168.506	191.071	-128.234	0.023
	19		6.446e-06	157.751	127.222	229.019	-98.531	0.011			19		5.22e-06	164.453	152.667	183.167	-39.806	0.009			19		1.32e-05	153.039	139.008	163.333	-80.311	0.023				19		7.37e-06	102.083	93.025	109.848	-87.51	0.013			19		1.41e-05	171.5	164.765	178.2	51.34	0.025
	20		7.674e-06	135.223	102.852	180.401	85.236	0.013			20		3.68e-06	160.851	154.948	174	135	0.006			20		9.52e-06	123.891	112.333	140.711	97.595	0.017				20		4.91e-06	103.147	95.88	108.88	93.814	0.008			20		1.01e-05	168.859	153.333	181.208	-124.695	0.018
	21		1.013e-05	127.37	95.667	154.88	-93.576	0.018			21		3.68e-06	161.981	159.192	165.697	-45	0.006			21		9.52e-06	96.864	85.333	113	-78.311	0.016				21		6.14e-06	109.247	101.778	120	-83.991	0.011			21	Mean	9.62e-06	196.818	181.126	216.819	-37.265	0.017
	22		5.218e-06	126.896	110.188	153.222	78.69	0.009			22		7.67e-06	168.523	158.422	185.416	136.736	0.013			22		8.6e-06	85.848	76	89.667	100.491	0.015				22	Mean	6.08e-06	85.278	77.389	92.753	-0.288	0.01			22	SD	3.05e-06	14.465	12.024	21.833	91.208	0.005
	23		3.683e-06	123.282	110.656	160.078	-94.764	0.006			23		1.2e-05	193.793	154.813	227.67	-45	0.021			23		7.98e-06	74.903	67.667	79.333	-83.157	0.014				23	SD	1.17e-06	15.18	14.754	16.549	93.032	0.002			23	Min	6.14e-06	168.859	153.333	178.2	-130.101	0.01
	24		6.446e-06	139.021	114.4	195.333	87.138	0.011			24		1.14e-05	183.248	150.418	232.262	135	0.02			24		9.52e-06	69.242	64.733	71.911	97.595	0.017				24	Min	3.38e-06	61.373	49.733	70.823	-90	0.006			24	Max	1.47e-05	222.798	198.197	246.869	59.534	0.026
	25		7.06e-06	140.683	115.444	205.798	-97.765	0.012			25		1.14e-05	163.241	133.287	184.329	-42.709	0.02			25	Mean	9.96e-06	91.841	83.564	99.887	8.437	0.017				25	Max	7.98e-06	109.247	103.074	120	97.125	0.014			21	Partial length a	0.000185	196.485	153.333	245.03	-127.117	0.334
	26		5.525e-06	128.172	111.662	162.433	86.634	0.01			26		7.37e-06	177.82	145.046	203.166	142.125	0.013			26	SD	2.05e-06	38.165	34.033	42.389	91.623	0.004				22	Full length measured along transect	0.000123	86.148	49.273	117.693	-85.966	0.221			21	Partial length a	0.000185	196.485	153.333	245.03	-127.117	0.334
	27		4.911e-06	129.243	113.387	181.173	-93.814	0.009			27		7.37e-06	215.176	191.222	243.351	-46.736	0.013			27	Min	7.06e-06	56.791	52.667	59.03	-84.806	0.012					Full length of tooth in ct						2.055
	28		6.139e-06	118.931	111.481	122.782	86.987	0.01			28		6.14e-06	197.219	163.667	232.259	137.121	0.01			28	Max	1.47e-05	165.434	157	184.763	102.995	0.026												# of von Ebner Lines
	29		7.06e-06	124.421	106.101	134.148	-97.765	0.012			29		7.06e-06	170.913	160.538	185.894	-39.472	0.012			25	Partial length of measured part of transect 1	0.000232	92.162	54.299	184.31	98.677	0.419												22.1	205.5				8.18627	15.1818	8.18627	15.1818	min
	30		7.367e-06	119.652	108.455	131.472	85.03	0.013			30		5.83e-06	168.543	153.926	181.691	132.709	0.01			25	Partial length of measured part of transect 1	0.000232	92.162	54.299	184.31	98.677	0.419							51.375	171.25	5.525	18.4167	min	15.7857	146.786					27.8333		27.8333	max
	31		7.981e-06	128.274	117.423	139.111	-97.125	0.014			31		6.14e-06	169.242	153.926	178.628	-36.254	0.01											# of von Ebner Lines							256.875		27.625	max	36.8333	342.5	1		1.32e-05	181.071	164.667	205.022	53.673	0.023
	32		7.674e-06	134.098	112.926	150.762	87.614	0.013			32		3.99e-06	160.512	154.469	168.889	131.634	0.007											24.6471	24.6471												2		6.75e-06	174.389	169.476	184	-131.186	0.012
	33		3.683e-06	164.751	111.871	233.005	-95.194	0.006			33		4.91e-06	164.938	159.309	172.862	-47.726	0.008						7.58371	19.9524	7.58371	19.9524	min	16.1154	16.1154												3		6.75e-06	170.922	164.726	176.429	54.782	0.012
	34		4.297e-06	158.191	114.443	229.753	85.601	0.007			34		6.14e-06	152.888	142.776	176.296	137.121	0.01							32.2308		32.2308	max	34.9167	34.9167												4		1.11e-05	165.567	162.6	168.587	-126.87	0.019
	35		8.288e-06	144.426	124.068	177.573	-98.746	0.015			35		5.22e-06	150.707	131.943	221.768	-50.194	0.009			1		8.29e-06	78.296	65.987	102.667	-83.418	0.015														5		7.67e-06	164.22	160.038	169.146	51.71	0.013
	36		6.753e-06	129.397	107.207	141.322	87.397	0.012			36		4.3e-06	137.687	133.367	144.888	141.34	0.007			2		1.04e-05	108.627	100.606	112.788	98.616	0.018														6		6.75e-06	158.136	153.726	162.603	-125.218	0.012
	37		6.446e-06	141.003	119.333	169.944	-98.531	0.011			37		7.67e-06	144.962	135.185	152.778	-43.264	0.013			3		1.07e-05	125.4	109.029	147.098	-81.634	0.019														7		1.14e-05	157.776	151.889	166.77	54.09	0.02
	38		7.367e-06	165.704	120.889	209.067	84.806	0.013			38		3.38e-06	168.527	152.222	188.667	143.13	0.006			4		1.04e-05	129.775	114	147	98.616	0.018														8		6.14e-06	153.583	151.014	157.333	-128.66	0.011
	39		4.604e-06	157.751	120.889	199.82	-94.086	0.008			39		3.68e-06	170.993	158.452	194.778	-30.964	0.006			5		1.01e-05	139.105	114	161.385	-81.119	0.018														9	Mean	8.71e-06	165.708	159.767	173.736	-37.21	0.015
	40		7.674e-06	153.908	126.009	192.259	85.236	0.013			40		5.53e-06	183.185	162.486	215.963	135	0.009			6		9.21e-06	170.893	156	182.793	99.782	0.016														10	SD	2.72e-06	9.32	6.826	15.026	97.059	0.005
	41		1.013e-05	169.67	111.358	224.421	-95.356	0.017			41		7.67e-06	163.49	136.889	230.13	-43.264	0.013			7		8.6e-06	198.23	179	206.531	-79.509	0.015														11	Min	6.14e-06	153.583	151.014	157.333	-131.186	0.011
	42		7.06e-06	166.519	133.333	210.758	84.806	0.012			42		5.53e-06	165.323	142.702	195	135	0.009			8		7.67e-06	203.844	193.667	220.333	99.462	0.013														12	Max	1.32e-05	181.071	169.476	205.022	54.782	0.023
	43		7.674e-06	142.961	120.667	181.667	-94.764	0.013			43		7.98e-06	171.245	160.722	181.074	-45	0.014			9		9.82e-06	203.833	188.215	225.57	-80.838	0.017														9		6.81e-05	166.418	150.778	203.716	-126.714	0.122
	44		7.06e-06	150.097	124.727	190.515	87.397	0.012			44		5.53e-06	155.198	144.804	181.074	139.764	0.009			10	Mean	9.48e-06	150.889	135.612	167.352	-1.116	0.017														9		6.81e-05	166.418	150.778	203.716	-126.714	0.122
	45		7.367e-06	154.257	125.667	231.241	-97.765	0.013			45		5.53e-06	156.809	139.889	168.222	-49.764	0.01			11	SD	1.09e-06	45.468	44.93	44.709	95.097	0.002
	46		1.044e-05	141.538	125.661	161.623	86.634	0.019			46		8.6e-06	156.022	139.889	170.037	138.013	0.015			12	Min	7.67e-06	78.296	65.987	102.667	-83.418	0.013
	47		8.595e-06	158.855	127.059	207.045	-98.746	0.015			47		1.29e-05	158.691	139.217	171.45	-42.089	0.023			13	Max	1.07e-05	203.844	193.667	225.57	99.782	0.019																	4.06667	6.1	4.06667	6.1	min
	48		9.515e-06	154.634	131.016	183.444	84.289	0.016			48		5.22e-06	138.77	124.208	146.222	137.726	0.009			10	Partial length of measured part of transect 2	8.38e-05	149.501	66	223.958	-80.918	0.151																		12.2		12.2	max
	49		6.446e-06	157.005	132	194.467	-92.862	0.011			49		1.07e-05	155.621	135	174.049	-46.169	0.019			10	Partial length of measured part of transect 2	8.38e-05	149.501	66	223.958	-80.918	0.151
	50		6.753e-06	141.433	136.176	150.37	84.289	0.012			50		4.91e-06	159.82	147.889	176.302	140.711	0.008											# of von Ebner Lines														Mean						0.016
	51		8.595e-06	154.411	127.283	188.095	-94.236	0.015			51		7.06e-06	167.01	154.694	194.111	-45	0.012											8.88235	8.88235													SD						0.005
	52		9.822e-06	166.248	136.667	202.564	84.472	0.017			52		5.83e-06	143.369	118.925	199.759	141.843	0.01						1.18431	7.94737	1.18431	7.94737	min	7.94737	7.94737													Min						0.0105
	53		1.105e-05	160.032	123.981	203.991	-94.899	0.019			53		5.22e-06	126.647	119.733	154.222	-42.51	0.009							10.0667		10.0667	max	11.6154	11.6154													Max						0.0245
	54		4.604e-06	170.01	126.725	226.841	81.87	0.008			54		7.37e-06	149.128	126.188	183.109	133.264	0.013																															0.456
	55		1.074e-05	163.501	135.845	224.654	-93.366	0.019			55		5.53e-06	138.749	116.444	165.621	-40.236	0.01				Mean						0.017															Full length at lvl of slice						6.13
	56		8.288e-06	153.379	138.312	166.73	80.91	0.014			56	Mean	6.63e-06	159.846	142.149	183.391	48.559	0.011				SD						0.003
	57		7.367e-06	155.664	117.754	199.591	-94.97	0.013			57	SD	2.22e-06	19.615	19.59	25.441	91.137	0.004				Min						0.0125
	58		7.674e-06	172.275	136.046	207.827	82.875	0.013			58	Min	3.38e-06	103.944	92.078	116.212	-55.62	0.006				Max						0.0225																	174.148	291.905	12.9545	21.7143	min
	59		9.209e-06	174.83	130.981	228.166	-95.906	0.016			59	Max	1.29e-05	215.176	191.222	243.351	143.13	0.023										0.57																		557.273		41.4545	max
	60		7.06e-06	168.874	133.29	209.99	84.806	0.012			56	Full length of measurement along transect	0.00035	156.752	99.064	245.355	-43.294	0.632										8.825
	61		7.06e-06	169.704	147.434	220.192	-95.194	0.012				Full length of tooth measured in ct						11.455											# of von Ebner Lines													Mx 7
	62		7.674e-06	184.013	143.481	227	85.236	0.013											# of von Ebner Lines										33.5294	519.118												7884-1 crown base
	63		1.504e-05	176.959	141.741	232.37	-93.576	0.027											57.4545	1041.36				111.239	441.25	7.18487	28.5	min	25.3333	392.222													Label	Area	Mean	Min	Max	Angle	Length
	64		6.446e-06	172.04	132.756	229.093	84.289	0.011						595.065	763.667	32.8312	42.1333	min	27.4783	498.043					630.357		40.7143	max	45.6	706												1		4.6e-06	60.791	56.074	67.841	-45	0.008
	65		7.674e-06	159.819	140.296	216.296	-99.462	0.013							1636.43		90.2857	max	105.333	1909.17																						2		7.67e-06	56.371	49	60.086	136.736	0.013
	66		5.218e-06	171.462	136.333	219.694	86.424	0.009													7842 mid root																					3		8.9e-06	57.971	42.75	69.633	-43.603	0.016
	67		1.044e-05	163.811	138.633	204.371	-95.356	0.018			7908 perpendicular to root margins, upper mid root (side b?)											Label	Area	Mean	Min	Max	Angle	Length														4		1.14e-05	62.05	50.525	72.16	136.123	0.02
	68		6.446e-06	157.575	140.889	176.552	84.289	0.011				Label	Area	Mean	Min	Max	Angle	Length			1		5.83e-06	144.979	137.556	166.442	-51.843	0.01														5		8.9e-06	59.115	54.081	67.056	-43.531	0.016
	69		8.595e-06	159.344	125.441	192.883	-96.116	0.015			1		7.06e-06	82.898	74.037	91.843	54.162	0.012			2		5.53e-06	135.3	125.111	148.444	125.538	0.01														6		7.67e-06	57.669	51.556	59.778	138.366	0.013
	70		6.446e-06	175.798	133	227.378	90	0.011			2		5.83e-06	78.193	69.215	85.444	-123.69	0.01			3		5.83e-06	122.32	119.593	127.519	-49.399	0.01														7		9.82e-06	55.357	43.57	69.333	-43.727	0.017
	71		9.209e-06	189.713	147.015	234.675	-98.13	0.016			3		7.06e-06	94.299	83.333	100.437	62.241	0.012			4		6.75e-06	123.971	120.54	126.739	122.905	0.011														8		5.22e-06	63.004	58.875	71.722	135	0.009
	72		7.367e-06	176.502	136.621	233.307	87.51	0.013			4		5.22e-06	97.991	90.444	102.222	-121.608	0.009			5		7.37e-06	132.46	126.148	139.377	-48.576	0.013														9		7.98e-06	57.87	49.373	70.578	-43.363	0.014
	73		8.288e-06	174.753	146.014	219.171	-96.582	0.014			5		6.45e-06	106.373	94.707	118.185	58.57	0.011			6		6.14e-06	139.097	133.528	149.136	126.254	0.01														10		8.9e-06	57.827	47.222	71.714	136.469	0.016
	74		8.902e-06	181.259	149.898	227.658	83.66	0.015			6		7.67e-06	122.531	113.329	151.346	-120.964	0.013			7		6.45e-06	134.12	129.255	136.789	-50.906	0.011														11		9.82e-06	57.682	48.086	70.296	-45	0.017
	75		1.105e-05	181.347	132.426	231.238	-94.764	0.02			7		8.29e-06	116.319	110.124	122.172	57.529	0.014			8		3.68e-06	131.359	128	135.625	127.875	0.006														12		9.52e-06	54.911	47.967	59.963	136.332	0.017
	76		9.822e-06	173.475	127.045	212.356	84.289	0.017			8		5.22e-06	111.896	101.056	127.363	-122.735	0.009			9		5.22e-06	128.938	127.411	130.889	-50.194	0.009														13		5.83e-06	57.03	53.315	62.581	-40.601	0.01
	77		7.06e-06	165.156	132.869	226.727	-92.603	0.012			9		4.91e-06	122.278	109.481	134.963	61.699	0.008			10		4.91e-06	141.991	130.889	157	126.87	0.008														14		8.6e-06	61.003	54.889	65.752	135	0.015
	78		7.674e-06	139.569	114.593	162.407	82.875	0.013			10		4.91e-06	121.047	106.215	148.934	-126.87	0.008			11		5.53e-06	161.258	155.755	171.317	-52.431	0.009														15		8.9e-06	54.135	48.937	60.296	-42.138	0.016
Pmx 1	79		7.367e-06	142.206	119.227	193.797	-94.97	0.013			11		6.45e-06	123.49	117.222	137.222	59.534	0.011			12		3.07e-06	159.431	155.37	164.123	130.601	0.005														16		1.07e-05	54.62	48	66.123	135	0.019
Pmx 3	80		6.753e-06	149.189	118.656	193.673	87.274	0.011			12		6.14e-06	128.504	124.569	136.232	-117.897	0.01			13		4.3e-06	156.598	151.504	159.624	-41.634	0.007														17		6.14e-06	54.423	48.329	61.741	-40.914	0.011
Mx 6	81		8.288e-06	155.291	131.222	209.881	-99.09	0.014			13		3.68e-06	120.767	117.676	127	56.31	0.006			14		4.3e-06	153.886	150.29	158.216	123.69	0.007														18		5.22e-06	59.43	55.042	63.271	135	0.009
Mx 7	82		5.832e-06	145.345	131.222	166.765	86.82	0.01			14		5.53e-06	121.842	115.815	128.864	-122.735	0.009			15		4.91e-06	162.568	155.515	169.778	-56.31	0.008														19		8.9e-06	58.095	53.333	61.453	-45	0.015
Mx 12	83		9.209e-06	146.611	121.754	216.438	-95.906	0.016			15		3.99e-06	128.935	115.255	143.148	59.036	0.007			16		3.99e-06	173.582	161.725	183.704	124.992	0.007														20		8.6e-06	51.473	48.116	55.214	138.013	0.015
Mx 12 replacement	84		6.139e-06	128.76	116.676	147.63	83.991	0.011			16		5.53e-06	123.065	118.706	127.667	-120.964	0.01			17		3.99e-06	164.11	154.79	182.185	-51.34	0.007														21		5.83e-06	57.324	46.717	63.745	-45	0.01
Mx 13	85		7.981e-06	129.708	120.28	138.764	-94.574	0.014			17		4.91e-06	114.273	107.881	122.815	61.699	0.008			18		5.22e-06	165.813	157.519	175.519	121.608	0.009														22		8.29e-06	58.027	51.651	64.667	136.548	0.014
Dent 2	86		1.289e-05	131.101	119.909	141.202	84.428	0.023			18		4.3e-06	100.883	95.129	113.407	-126.027	0.007			19		6.75e-06	158.61	152.244	168.143	-52.595	0.012														23		8.29e-06	68.068	52.099	85.602	-43.452	0.015
Dent 4	87		7.981e-06	131.164	119.778	154.967	-94.574	0.014			19		5.83e-06	104.928	98.893	110.444	59.036	0.01			20		5.53e-06	160.472	149.667	180.641	128.157	0.01														24		9.52e-06	59.35	49.787	74.444	133.668	0.017
Dent 4 replacement	88		1.105e-05	120.97	104.611	148.533	84.958	0.019			20		4.6e-06	111.912	107.905	116.009	-123.69	0.008			21		4.3e-06	157.476	149.265	165.641	-45	0.007														25		8.9e-06	56.668	43.367	72.172	-40.601	0.015
Dent 11	89		9.822e-06	106.638	103.447	110.605	-95.528	0.017			21		6.45e-06	112.922	110.987	115.04	63.435	0.011			22		3.99e-06	153.108	146.835	165.405	131.634	0.007														26		6.14e-06	78.856	61.537	108.52	137.121	0.011
Dent 12	90		7.06e-06	103.436	96.798	111.111	87.397	0.012			22		4.91e-06	111.972	107.735	117.227	-121.608	0.008			23		5.22e-06	157.673	147.778	168.535	-57.265	0.009														27		7.06e-06	82.976	72.938	92.715	-43.152	0.012
Dent 12 replacement	91		9.822e-06	102.259	91.862	107.93	-95.528	0.017			23		6.14e-06	115.411	108.926	122.684	55.491	0.011			24		6.45e-06	151.114	143.607	157.293	129.094	0.011														28		5.83e-06	78.908	71.062	86.926	137.291	0.01
Dent 18	92		6.139e-06	100.037	93.333	104.819	86.82	0.01			24		5.22e-06	116.851	114.058	123.046	-124.695	0.009			25		3.68e-06	150.826	144.444	154.616	-52.125	0.006														29	Mean	7.97e-06	60.393	52.079	69.835	46.485	0.014
Dent 19	93		7.981e-06	99.528	94.292	105.116	-99.09	0.014			25		6.45e-06	113.167	109.191	116.216	-119.055	0.011			26		3.38e-06	144.717	142.489	147.284	126.87	0.006														30	SD	1.77e-06	7.709	7.13	11.445	91.363	0.003
	94		7.06e-06	96.844	93.101	103.367	87.397	0.012			26		6.75e-06	118.466	112.185	129.048	58.57	0.012			27		3.99e-06	152.4	145.889	161.099	-55.008	0.007														31	Min	4.6e-06	51.473	42.75	55.214	-45	0.008
	95		8.902e-06	93.64	87.556	100.794	-98.13	0.016			27		6.14e-06	102.224	95.667	112.185	-122.005	0.011			28		4.6e-06	154.575	147.803	165.472	131.987	0.008														32	Max	1.14e-05	82.976	72.938	108.52	138.366	0.02
	96	Mean	7.7e-06	149.996	122.668	187.883	-6.276	0.013			28		5.22e-06	93.325	89.521	97.819	60.255	0.009			29		4.3e-06	141.766	135.111	158.926	-48.013	0.007														29	Partial length along transect 1	0.000216	59.73	41.81	109.837	136.445	0.389
	97	SD	1.997e-06	22.743	14.278	37.942	91.133	0.004			29		6.75e-06	93.827	88.111	98.429	-119.055	0.011			30		5.22e-06	131.802	122.444	145.77	124.695	0.009														29	Partial length along transect 1	0.000216	59.73	41.81	109.837	136.445	0.389
	98	Min	3.683e-06	93.64	87.556	100.794	-99.462	0.006			30		5.22e-06	95.381	88.111	102.611	60.255	0.009			31		7.06e-06	122.259	116.299	132.519	-54.162	0.012
	99	Max	1.504e-05	191.382	154.533	234.675	90	0.027			31		7.37e-06	114.024	95.333	123.449	-120.964	0.013			32		5.22e-06	143.185	132.519	161.222	129.806	0.009
	96	Full length of measured transect	0.0007023	150.93	86.087	237.557	-95.344	1.267			32		5.22e-06	129.303	122.667	131.519	57.265	0.009			33	Mean	5.08e-06	147.243	140.528	156.718	37.993	0.009																	7.57792	22.8824	7.57792	22.8824	min
		Full length of tooth measured in ct						5.655			33		9.52e-06	131.767	123.889	136.294	-122.619	0.017			34	SD	1.13e-06	13.904	12.989	15.942	90.536	0.002																		35.3636		35.3636	max
									# of von Ebner Lines		34		5.22e-06	129.197	123.667	134.381	60.255	0.009			35	Min	3.07e-06	122.259	116.299	126.739	-57.265	0.005														1		4.91e-06	46.358	40.274	63.667	-42.274	0.008
									97.4615	435	35		5.22e-06	138.425	126.222	149.444	-124.695	0.009			36	Max	7.37e-06	173.582	161.725	183.704	131.987	0.013														2		6.45e-06	47.43	35.382	55.36	135	0.011
				193.333	332.647	43.3162	74.5294	min	46.9259	209.444	36		4.91e-06	123.62	116.589	129.029	58.392	0.008			33	Full length of measured portion of transect	0.000153	146.258	116.493	183.022	127.976	0.276														3		6.75e-06	55.03	45.595	65.401	-45	0.012
					628.333		140.778	max	211.167	942.5	37		5.83e-06	114.874	108.04	125.564	-122.005	0.01				Full length of tooth in ct						8.825														4		8.9e-06	61.456	54.966	72.74	137.862	0.016
											38		7.98e-06	112.547	104.356	122.181	61.39	0.014											# of von Ebner Lines													5		8.6e-06	74.582	59.303	85.638	-43.531	0.015
	7836 central axis, crown apex										39		5.22e-06	117.27	108.852	123.111	-124.695	0.009											30.6667	980.556												6		7.67e-06	76.231	66.667	83.556	138.366	0.013
		Label	Area	Mean	Min	Max	Angle	Length			40		4.3e-06	112.698	108.852	117.155	57.529	0.007						280.159	802.273	8.7619	25.0909	min	21.2308	678.846												7		6.75e-06	84.124	73.125	100.566	-43.025	0.012
	1		1.013e-05	81.198	66.833	106.167	91.79	0.018			41		8.9e-06	119.309	112.111	129.333	-120.256	0.016							1260.71		39.4286	max	55.2	1765												8		7.98e-06	79.346	67.404	94.822	138.18	0.014
	2		8.902e-06	81.723	69.31	112.071	-92.045	0.016			42		8.9e-06	117.552	111.296	123.746	57.995	0.015																								9		8.6e-06	75.515	59.481	96.579	-45	0.015
	3		6.446e-06	73.825	68.333	80.333	90	0.011			43		5.22e-06	114.208	109.926	117.852	-121.608	0.009			7849 mid root																					10		7.06e-06	60.347	54.653	69.889	136.848	0.012
	4		6.139e-06	86.818	68.965	109.579	-86.987	0.011			44		6.75e-06	121.709	115.111	132.543	59.931	0.012				Area	Mean	Min	Max	Angle	Length															11		7.06e-06	71.499	63.667	80.129	-45	0.012
	5		1.166e-05	82.244	66.667	100.928	91.548	0.021			45		5.83e-06	123.841	116	127.667	-123.69	0.01			1	7.98e-06	136.096	128.473	142.412	128.66	0.014															12		6.75e-06	62.232	58.206	67.952	138.814	0.012
	6		9.209e-06	78.061	64.034	98.667	91.975	0.016			46		3.68e-06	121.841	118.99	126.03	56.31	0.006			2	4.6e-06	143.016	136.281	147.043	-48.013	0.008															13		8.6e-06	64.624	56.757	79.72	-46.469	0.015
	7		5.525e-06	74.963	59.333	92.667	-90	0.009			47		6.45e-06	127.576	119.111	136.415	-119.055	0.011			3	5.53e-06	135.365	132.049	143	128.157	0.009															14		5.53e-06	79.795	68.462	107.354	137.291	0.01
	8		7.367e-06	66.708	63	73.333	90	0.013			48		5.22e-06	128.776	123.481	131.806	58.392	0.009			4	3.99e-06	131.529	127	138.111	-48.366	0.007															15		9.21e-06	78.527	65.732	86.861	-43.603	0.016
	9		1.074e-05	68.406	55.706	82.549	-86.634	0.019			49		6.75e-06	123.687	119.745	130.852	-121.43	0.012			5	5.22e-06	128.23	122.444	133.407	124.695	0.009															16		7.37e-06	64.983	57.926	69.913	138.576	0.013
	10		8.595e-06	67.687	59.21	76.667	87.879	0.015			50		5.22e-06	125.573	121.667	130.975	60.255	0.009			6	5.22e-06	119.572	114.278	124.583	-45	0.009															17		1.01e-05	63.509	54.143	76.299	-46.273	0.018
	11		1.565e-05	70.141	59.667	81.333	-88.854	0.028			51		5.22e-06	125.794	122.222	129.111	-121.608	0.009			7	4.91e-06	117.441	114.728	119.593	126.87	0.008															18		7.98e-06	72.61	65.301	79.081	138.366	0.014
	12		1.259e-05	80.642	58.667	98.667	90	0.022			52		6.14e-06	121.043	118.335	125.112	57.995	0.01			8	3.99e-06	121.179	119.284	123.852	-55.008	0.007															19		5.83e-06	74.376	66.111	82.773	-45	0.01
	13		8.288e-06	66.062	53.333	83.667	-90	0.014			53		5.53e-06	123.164	119.314	125.75	-120.964	0.009			9	6.45e-06	119.623	114.197	127.667	130.914	0.011															20		7.67e-06	62.049	56.111	70.333	138.366	0.013
	14		6.139e-06	63.117	59.333	69.667	90	0.011			54		5.83e-06	121.718	117.962	125.09	59.036	0.01			10	4.6e-06	129.127	126.656	131.952	-50.711	0.008															21		7.67e-06	62.466	50.975	70.333	-45	0.013
	15		7.367e-06	71.059	59.667	85.42	-87.51	0.013			55		7.06e-06	121.825	114.869	127	-118.811	0.012			11	5.22e-06	129.779	125.294	135.731	127.569	0.009															22		6.45e-06	60.731	51.222	68.224	136.975	0.011
	16		8.902e-06	71.723	59.333	81.262	92.045	0.016			56		5.22e-06	118.754	113.667	122.333	50.194	0.009			12	6.45e-06	124.148	121.422	128.593	-49.086	0.011															23		7.67e-06	53.324	48.639	58.778	-45	0.013
	17		5.832e-06	61.46	57	66.556	-93.18	0.01			57		5.22e-06	116.955	111.964	123.361	-119.745	0.009			13	7.98e-06	127.397	122.333	133.204	130.101	0.014															24		8.6e-06	50.483	41.276	57.798	135	0.015
	18		7.674e-06	58.435	52.694	62.417	92.386	0.013			58		6.45e-06	120.084	114.019	125.748	60.945	0.011			14	6.75e-06	131.753	127.885	140.365	-54.782	0.011															25		7.67e-06	51.115	43.881	57.942	-41.634	0.013
	19		7.367e-06	58.569	51.333	65.667	-90	0.013			59		6.14e-06	114.298	111.491	118.333	-122.005	0.01			15	5.83e-06	130.164	123.074	137.691	130.601	0.01															26	Mean	7.51e-06	65.31	56.21	76.068	42.913	0.013
	20		1.044e-05	72.157	59.667	110.091	91.736	0.018			60		6.14e-06	118.62	110.667	123.805	57.995	0.01			16	8.29e-06	126.272	120.417	133.388	-52.696	0.014															27	SD	1.21e-06	10.917	9.829	13.901	92.731	0.002
	21		1.412e-05	96.674	59	157	166.551	0.026			61		4.91e-06	112.252	105.4	116.541	-123.69	0.008			17	6.45e-06	124.736	120.72	131.889	135	0.011															28	Min	4.91e-06	46.358	35.382	55.36	-46.469	0.008
	22		1.412e-05	96.674	59	157	166.551	0.026			62		5.83e-06	118.144	114.742	123.951	56.31	0.01			18	4.6e-06	133.962	131.658	137.185	-56.31	0.008															29	Max	1.01e-05	84.124	73.125	107.354	138.814	0.018
	23		1.136e-05	68.135	57.333	84.333	90	0.02			63	Mean	5.91e-06	115.91	109.291	123.315	-31.668	0.01			19	4.6e-06	138.466	132.476	146.531	129.289	0.008															26	Partial length along transect 2	0.000182	65.632	33.893	105.386	-43.559	0.327
	24		7.367e-06	67.666	61.435	81.826	-87.51	0.013			64	SD	1.21e-06	11.546	12.148	12.773	91.082	0.002			20	4.91e-06	128.875	124.206	133.889	-50.711	0.008															26	Partial length along transect 2	0.000182	65.632	33.893	105.386	-43.559	0.327
	25		7.06e-06	68.623	60.333	75.333	90	0.012			65	Min	3.68e-06	78.193	69.215	85.444	-126.87	0.006			21	7.37e-06	129.427	120.778	141.936	129.806	0.013
	26		7.367e-06	68.441	61.812	80.232	-87.51	0.013			66	Max	9.52e-06	138.425	126.222	151.346	63.435	0.017			22	4.3e-06	120.528	117.197	126.074	-53.973	0.007
	27		8.902e-06	54.64	46.333	69.333	92.045	0.016			63	Full length of measurement along transect	0.000348	116.148	70.161	163.466	58.542	0.627			23	4.91e-06	126.464	123.822	131	132.274	0.008																		4.57343	21.8	4.57343	21.8	min
	28		9.209e-06	62.1	50	76.667	-90	0.016				Full length of tooth measured in ct						11.455			24	5.83e-06	132.164	125.679	139.519	-49.399	0.01																			29.7273		29.7273	max
	29		9.515e-06	59.172	54.333	64.667	90	0.017											# of von Ebner Lines		25	5.53e-06	132.64	130.074	135.209	125.538	0.01															1		7.67e-06	62.136	56.167	66.932	-45	0.013
	30		8.288e-06	57.728	47	66.667	-90	0.014											62.7	1145.5	26	2.76e-06	130.523	127.028	134.688	-45	0.005															2		6.45e-06	65.245	59.281	71.287	137.121	0.011
	31		8.288e-06	52.422	45.782	61.705	92.203	0.014						286.375	954.583	15.675	52.25	min	36.8824	673.824	27	4.6e-06	131.206	128.143	136.556	131.987	0.008															3		7.98e-06	68.387	61.622	76.207	-43.363	0.014
	32		7.674e-06	55.573	45.333	73	-90	0.013							1431.88		78.375	max	104.5	1909.17	28	4.3e-06	134.393	131.347	137.576	-57.529	0.007															4		1.14e-05	68.065	56.364	75.222	133.877	0.02
	33		7.981e-06	61.629	50	84.12	87.709	0.014													29	3.07e-06	131.914	130.058	133.889	135	0.005															5		9.52e-06	87.518	72.289	110.978	-42.274	0.016
	34		8.288e-06	57.163	49.038	66.705	-87.797	0.014			7919 lower crown										30	3.68e-06	132.541	127.612	137.756	-56.31	0.006															6		8.29e-06	103.045	84.63	117.667	136.548	0.014
	35		7.06e-06	57.297	48.667	62.909	92.603	0.012				Label	Area	Mean	Min	Max	Angle	Length			31	3.99e-06	133.453	130.444	138.407	131.634	0.007															7		1.04e-05	129.919	100.354	197.929	-42.51	0.018
	36		8.288e-06	60.099	51.333	72.667	-90	0.014			1		6.45e-06	71.106	66.567	76.833	75.256	0.011			32	3.68e-06	141.411	133.889	148.047	-63.435	0.006															8	Mean	8.81e-06	83.473	70.101	102.317	33.485	0.015
	37		9.209e-06	56.889	50	67.333	90	0.016			2		1.11e-05	76.758	65.571	84.219	-96.52	0.02			33	6.14e-06	131.83	125.035	138.374	137.121	0.01															9	SD	1.71e-06	25.196	16.847	46.696	95.761	0.003
	38		9.209e-06	60.175	50.276	66.621	-88.025	0.016			3		5.22e-06	71.248	65.926	75.333	79.38	0.009			34	5.22e-06	135.957	128.269	141.38	-55.305	0.009															10	Min	6.45e-06	62.136	56.167	66.932	-45	0.011
	39		7.981e-06	57.667	49	62.667	92.291	0.014			4		5.53e-06	66.19	62.667	71.007	-100.62	0.009			35	8.6e-06	132.294	122.292	140	128.991	0.015															11	Max	1.14e-05	129.919	100.354	197.929	137.121	0.02
	40		6.139e-06	53.261	46.684	60.702	-93.013	0.011			5		7.06e-06	64.658	58.333	70.475	82.235	0.012			36	6.45e-06	129.454	126.333	133.111	-47.121	0.011															8	Partial length along transect 3	5.89e-05	85.937	54.657	197.8	-43.303	0.106
	41		7.674e-06	52.467	47	57.333	90	0.013			6		6.75e-06	80.595	62.53	92.615	-98.13	0.012			37	6.75e-06	129.945	123.614	133.81	131.186	0.012															8	Partial length along transect 3	5.89e-05	85.937	54.657	197.8	-43.303	0.106
	42		7.981e-06	56.385	48.333	68.333	-90	0.014			7		8.9e-06	85.462	71.916	98.022	81.573	0.015			38	4.6e-06	150.734	133.333	162.079	-50.711	0.008
	43		6.446e-06	58.444	48.333	74.333	90	0.011			8		5.83e-06	80.603	72.802	92.025	-102.529	0.01			39	Mean	5.4e-06	130.621	125.522	136.303	39.103	0.009
	44		1.228e-05	54.11	46	61.949	-87.064	0.022			9		7.37e-06	103.26	96.475	109.604	79.695	0.013			40	SD	1.43e-06	6.607	5.519	7.634	92.49	0.003																	1.76667	5.88889	1.76667	5.88889	min
	45		7.674e-06	48.613	43.667	53.667	90	0.013			10		5.22e-06	109.327	93	125.111	-100.62	0.009			41	Min	2.76e-06	117.441	114.197	119.593	-63.435	0.005																		8.83333		8.83333	max
	46		5.832e-06	47.035	43	50	-90	0.01			11		1.11e-05	120.895	107.848	155.596	83.48	0.019			42	Max	8.6e-06	150.734	136.281	162.079	137.121	0.015
	47		5.525e-06	44.773	42.471	47.784	93.366	0.009			12		1.23e-05	136.666	114.185	184.884	-100.176	0.022			39	Full length measured along transect	0.000194	130.067	113.747	162.105	-50.845	0.35															Mean						0.014
	48		6.446e-06	50.975	47	56.333	-92.862	0.011			13		7.06e-06	136.376	118.785	175.667	79.216	0.012				Full length of tooth in ct						8.825															SD						0.00266667
	49		9.209e-06	56.656	51	66.333	90	0.016			14		5.83e-06	130.775	118.049	143	-102.529	0.01											# of von Ebner Lines														Min						0.009
	50		7.981e-06	55.703	48.547	77.333	-87.709	0.014			15		5.83e-06	115.574	103.586	128.519	83.29	0.01											38.8889	980.556													Max						0.0193333
	51		7.367e-06	64.915	55.174	73.333	87.51	0.013			16		7.37e-06	107.43	89.055	121.667	-97.431	0.013						490.278	735.417	19.4444	29.1667	min	23.3333	588.333																			0.822
	52		5.525e-06	68.111	58	91.667	-90	0.009			17		8.29e-06	109.265	95.017	116.667	78.69	0.014							1470.83		58.3333	max	70	1765																			6.225
	53		4.911e-06	62.453	57.37	76.778	90	0.009			18		6.45e-06	115.243	102.453	124.622	-98.531	0.011
	54		7.367e-06	71.59	55.348	102.59	-87.51	0.013			19		1.01e-05	108.095	90.736	125.222	81.119	0.018
	55		7.367e-06	74.1	58.781	88.981	90	0.013			20		7.67e-06	118.337	98.617	132.299	-97.431	0.013																											104.622	373.5	13.8151	49.32	min
	56		8.595e-06	89.191	72.066	113.992	-87.797	0.015			21		1.11e-05	135.423	99.863	206.476	81.87	0.019																												549.265		72.5294	max
	57		6.753e-06	117.516	87.791	170.993	90	0.012			22		6.45e-06	137.346	125.689	145.111	-98.531	0.011
	58		9.209e-06	111.267	54.207	225.165	-88.025	0.016			23		8.29e-06	141.233	122.296	186.041	80.91	0.014																								7900 central axis, mid crown
	59		5.832e-06	71.983	55.296	94.3	86.82	0.01			24		7.67e-06	116.082	101.815	129.528	-99.866	0.013																									Label	Area	Mean	Min	Max	Angle	Length
	60		4.911e-06	100.936	50.296	149.646	-90	0.009			25		6.14e-06	104.206	96.293	110.582	81.027	0.011																								1		1.04e-05	186.476	134	250.333	102.339	0.018
	61		8.902e-06	106.091	85.333	132.19	92.045	0.016			26		8.6e-06	116.822	97.778	161.111	-96.34	0.015																								2		1.35e-05	189.649	140	253.359	-75.324	0.024
	62		6.446e-06	98.826	64.533	139.778	-92.862	0.011			27		6.75e-06	110.497	98.249	132.519	81.87	0.012																								3		8.6e-06	134.306	109.519	156.384	102.995	0.015
	63		5.525e-06	79.042	74.065	85.693	90	0.01			28		7.67e-06	106.732	94.608	125.137	-99.866	0.013																								4		7.06e-06	108.666	96.537	125.055	-72.35	0.012
	64		6.753e-06	80.956	69.222	93.873	-90	0.012			29		5.53e-06	111.297	96.778	119.85	79.992	0.009																								5		6.45e-06	99.358	96.533	103.233	98.973	0.011
	65		1.197e-05	68.873	60.097	80.731	90	0.021			30		8.6e-06	116.949	94.577	167.668	-96.34	0.015																								6		6.45e-06	92.196	86.969	96.926	-72.474	0.011
	66		1.136e-05	74.99	66.778	83.49	-88.409	0.02			31		4.6e-06	109.952	98.667	115	81.87	0.008																								7		7.98e-06	87.667	77.148	95.262	104.036	0.014
	67		7.367e-06	64.62	53.407	70.333	90	0.013			32		4.91e-06	112.639	105.667	118.148	-105.945	0.008																								8		1.14e-05	84.765	79.296	89.557	-77.125	0.02
	68		5.525e-06	60.8	53.407	65.85	-90	0.01			33		5.22e-06	115.638	111.111	123.149	78.69	0.009																								9		1.35e-05	85.993	79.271	93.025	103.392	0.024
	69		7.06e-06	63.397	59.242	68.182	92.603	0.012			34		6.75e-06	111.486	103.19	128.095	-98.13	0.012																								10		8.6e-06	89.303	85.185	92.571	-72.897	0.015
	70		9.515e-06	62.319	55.333	69.333	-90	0.017			35		7.67e-06	100.765	86.898	112.941	80.538	0.013																								11		7.37e-06	90.395	86.696	92.58	99.866	0.013
	71		9.822e-06	56.578	48.514	62.769	90	0.017			36		5.83e-06	93.578	89.16	98.053	-99.462	0.01																								12		6.14e-06	87.085	76.24	92.109	-71.565	0.011
	72		6.139e-06	48.756	45.965	51.825	-90	0.011			37		9.21e-06	102.972	90.115	113.399	79.875	0.016																								13		7.37e-06	87.467	81.389	94.556	102.265	0.013
	73		9.822e-06	55.022	48.903	60.065	90	0.017			38		5.83e-06	102.608	91.333	119.284	-99.462	0.01																								14		1.11e-05	96.851	91.008	103.952	-74.745	0.019
	74		9.209e-06	55.043	47.267	61.818	-88.025	0.016			39		6.14e-06	101.9	96.321	105.992	80.538	0.01																								15		1.2e-05	105.137	93.333	120.852	103.325	0.021
	75		6.139e-06	51.261	47.667	54.246	93.013	0.01			40		6.75e-06	98.853	89.02	107.638	-100.784	0.012																								16		5.53e-06	124.561	120.233	130.294	-72.646	0.01
	76		6.139e-06	47.238	42.556	50	-90	0.011			41		6.45e-06	94.542	81.673	102.5	83.991	0.011																								17		5.22e-06	137.582	125.222	151.556	104.036	0.009
	77		6.139e-06	45.487	41.776	49.762	93.013	0.01			42		7.06e-06	90.869	85.853	98.747	-98.13	0.012																								18		8.29e-06	178.147	137.044	225.489	-77.005	0.014
	78		6.753e-06	48.999	44.198	53.524	-90	0.012			43		6.75e-06	96.446	87.526	105.313	81.87	0.012																								19		7.67e-06	204.211	140.222	246.79	102.265	0.013
	79		8.902e-06	51.024	47.778	55.185	90	0.016			44		5.53e-06	97.842	89.333	102.453	83.29	0.009																								20		5.53e-06	214.722	173.247	239.394	-69.444	0.009
	80		7.367e-06	51.534	49.704	53.266	-90	0.013			45		5.53e-06	100.773	85.599	125.519	-96.71	0.01																								21		5.53e-06	195.76	166.921	245.787	93.366	0.01
	81		9.822e-06	55.045	49.704	58.107	91.848	0.017			46		5.22e-06	128.51	85.333	167.861	78.69	0.009																								22		7.06e-06	157.686	144.679	172.763	-74.745	0.012
	82		8.595e-06	60.201	56.667	65.642	-90	0.015			47		7.06e-06	107.254	85.333	125.354	-97.765	0.012																								23		9.82e-06	188.743	155.444	222.514	104.931	0.017
	83		7.367e-06	65.025	58.878	76.907	90	0.013			48		6.45e-06	122.135	103.704	142.556	81.469	0.011																								24		6.75e-06	163.829	141.886	183.706	-73.301	0.012
	84		6.139e-06	78.26	59.421	94.052	-86.987	0.01			49		5.53e-06	112.098	96.791	139.392	-104.036	0.009																								25		1.01e-05	127.619	118.337	143	102.724	0.018
	85		9.822e-06	71.567	54.746	85.039	90	0.017			50		7.67e-06	134.535	105.333	178.37	82.875	0.013																								26		7.98e-06	122.386	116.705	130.778	-75.964	0.014
	86	Mean	8.187e-06	66.65	55.407	81.785	7.685	0.014			51		7.06e-06	119.601	104.37	140.852	-100.305	0.012																								27		8.6e-06	129.945	120.619	141.963	102.995	0.015
	87	SD	2.145e-06	15.207	8.972	29.855	92.807	0.004			52		6.14e-06	103.767	93.311	114.118	86.987	0.011																								28		1.2e-05	142.044	117.839	160.313	-76.329	0.021
	88	Min	4.911e-06	44.773	41.776	47.784	-93.18	0.009			53		6.75e-06	102.791	85.972	124.514	-103.392	0.012																								29		7.37e-06	125.268	115.451	144.252	105.255	0.013
	89	Max	1.565e-05	117.516	87.791	225.165	166.551	0.028			54		9.82e-06	118.955	106.553	143.615	84.289	0.017																								30		7.37e-06	122.743	117.97	130.816	-74.745	0.013
	86		0.0006424	65.924	41.941	226.208	90.712	1.159			55		9.21e-06	127.167	103.918	167.459	-99.782	0.016																								31		8.6e-06	140.107	126	157.61	100.491	0.015
		Full length of tooth measured in ct						5.655			56		7.98e-06	119.272	105.53	135.879	83.157	0.014																								32		1.2e-05	110.516	97.92	138.439	-73.009	0.021
									# of von Ebner Lines		57		5.83e-06	103.867	95.111	113.333	-102.529	0.01																								33		9.52e-06	108.766	101.767	112.68	103.57	0.016
									82.7857	403.929	58	Mean	7.14e-06	107.636	93.768	125.56	-7.617	0.012																								34		9.52e-06	123.555	106.86	158.012	-76.43	0.017
				161.571	314.167	33.1143	64.3889	min	41.3929	201.964	59	SD	1.72e-06	18.074	14.911	29.615	91.326	0.003																								35		1.14e-05	144.974	120.802	197.035	104.421	0.02
					565.5		115.9	max	128.778	628.333	60	Min	4.6e-06	64.658	58.333	70.475	-105.945	0.008																								36		8.6e-06	136.081	119.889	147.194	-74.932	0.015
											61	Max	1.23e-05	141.233	125.689	206.476	86.987	0.022																								37		1.01e-05	104.701	91.376	119.889	104.036	0.018
	7850 central axis, crown apex										58	Full length of measurement along transect	0.00039	108.994	59.572	201.669	-98.578	0.702																								38		1.01e-05	107.493	96.111	116.373	-77.276	0.018
		Label	Area	Mean	Min	Max	Angle	Length				Full length of tooth measured in ct						11.455																								39		7.98e-06	91.026	86.781	97.098	103.496	0.014
	1		7.67e-06	80.067	61	90	-90	0.013											# of von Ebner Lines																							40		7.37e-06	94.785	87.155	99.042	-77.196	0.013
	2		6.14e-06	88.086	81.333	95.298	93.013	0.011											58.5	954.583																						41		7.67e-06	92.93	84.296	98.435	104.621	0.013
	3		6.45e-06	77.778	74.333	81.333	-90	0.011						318.194	763.667	19.5	46.8	min	31.9091	520.682																						42		3.99e-06	98.512	84.556	108	-70.017	0.007
	4		5.22e-06	82.333	78.667	88	90	0.009							1272.78		78	max	87.75	1431.88																						43		9.52e-06	96.453	86.074	112.681	105.422	0.017
	5		6.45e-06	91.889	83.433	101.6	-95.711	0.011																																		44		6.75e-06	93.688	89.481	97.29	-79.216	0.012
	6		5.53e-06	92.398	82.608	109.922	93.366	0.009																																		45		8.9e-06	86.724	82.227	89.935	106.504	0.016
	7		1.11e-05	106.75	83.333	128.667	-90	0.019																																		46		8.29e-06	85.702	83.079	90.339	-74.932	0.015
	8		7.67e-06	110.125	85.792	150.222	87.614	0.013																																		47		4.6e-06	90.511	86.85	98.333	107.103	0.008
	9		8.29e-06	86.827	63.333	115.667	-90	0.014																																		48		6.14e-06	100.329	91.34	106.817	-74.476	0.01
	10		7.98e-06	121.359	74.333	174.12	87.709	0.014																																		49		7.37e-06	114.624	106.37	121.577	105.255	0.013
	11		9.82e-06	190.302	97.667	244.333	-90	0.017																																		50		7.67e-06	120.892	112.103	136.889	-72.35	0.013
	12		8.29e-06	149.21	81	218.667	90	0.014																																		51		9.82e-06	136.373	113.629	168	100.954	0.017
	13		7.67e-06	126	58.333	239	-90	0.013																																		52		9.21e-06	108.894	78.522	181.107	-72.181	0.016
	14		7.37e-06	126.856	63.768	195.855	87.51	0.013																																		53		1.04e-05	86.986	79.72	93.889	106.189	0.018
	15		5.22e-06	104.745	89.167	123	-82.875	0.009																																		54		7.98e-06	80.668	75.683	88.667	-78.69	0.014
	16		9.52e-06	116.115	96.867	154.111	88.091	0.017																																		55		7.98e-06	88.758	79.636	107.222	104.036	0.014
	17		1.11e-05	109.602	48.667	171.667	-90	0.019																																		56		7.06e-06	109.999	101.285	118.797	-74.055	0.012
	18		8.29e-06	121.753	69.333	185.333	90	0.014																																		57		7.67e-06	98.337	85.918	106.416	104.621	0.013
	19		7.98e-06	167.601	114.013	245	-92.291	0.014																																		58		1.04e-05	92.438	83.895	97.646	-76.373	0.019
	20		1.04e-05	174.521	52.434	236.465	91.736	0.018																																		59		7.67e-06	93.078	90.753	95.09	104.621	0.013
	21		4.91e-06	178.833	77.667	239	-90	0.008																																		60		9.82e-06	93.832	88.004	103.265	-76.866	0.017
	22		5.53e-06	218.63	160.667	237	90	0.009																																		61		7.98e-06	92.205	90.15	94.347	104.036	0.014
	23		4.6e-06	153.965	89.19	217	-85.914	0.008																																		62		7.06e-06	94.311	89.764	99.465	-74.745	0.012
	24		4.6e-06	156.47	25	231.238	81.87	0.008																																		63		1.04e-05	88.207	83.073	92.674	104.036	0.018
	25		6.45e-06	146.178	61.733	235.133	-84.289	0.011																																		64		9.52e-06	93.713	83.556	100.756	-76.43	0.016
	26		7.06e-06	122.673	62.576	217.515	87.397	0.012																																		65		1.29e-05	105.834	83.556	113.616	102.68	0.023
	27		5.22e-06	130.235	91.667	219	-90	0.009																																		66		6.14e-06	114.176	107.444	118.031	-75.256	0.011
	28		5.53e-06	124.476	78.49	213.783	-90	0.01																																		67		6.75e-06	101.684	94.136	107.444	106.699	0.011
	29		8.29e-06	95.237	37.128	150.923	90	0.014																																		68		1.07e-05	94.433	84.507	105.878	-75.964	0.019
	30		7.37e-06	105.222	72.302	179.447	-92.49	0.013																																		69		1.2e-05	99.25	93.868	106.95	104.744	0.021
	31		3.99e-06	96.353	72.185	108	94.764	0.007																																		70		7.98e-06	100.497	92.601	106.148	-75.964	0.014
	32		4.91e-06	91.28	71.654	107	-90	0.008																																		71		7.98e-06	83.381	76.681	100.333	103.496	0.014
	33		8.29e-06	90.331	57	111.687	87.797	0.014																																		72		5.83e-06	91.904	85.148	96.63	-76.759	0.01
	34		7.37e-06	96.154	82.256	139.22	-90	0.013																																		73		5.53e-06	98.433	93.111	102.191	103.241	0.01
	35		1.11e-05	87.398	81.46	93.81	90	0.02																																		74		8.6e-06	95.24	86.741	106.224	-77.005	0.015
	36		6.45e-06	99.336	87.667	116.967	-90	0.011																																		75		1.44e-05	99.52	91.068	113.519	104.931	0.026
	37		5.53e-06	94.81	83.663	102.261	90	0.009																																		76		7.37e-06	125.187	110.347	143.9	-77.196	0.013
	38		5.22e-06	97.007	82.333	110.111	-90	0.009																																		77		1.07e-05	133.213	116.24	161.185	103.241	0.019
	39		5.53e-06	79.502	74.961	82.34	90	0.009																																		78		9.82e-06	113.803	99.975	139.164	-73.301	0.017
	40		6.75e-06	88.14	77.222	94.164	-90	0.011																																		79		8.6e-06	130.005	112.444	149.675	102.995	0.015
	41		7.37e-06	86.969	78.435	97.955	90	0.013																																		80		8.29e-06	131.841	120	137.665	-76.504	0.015
	42		7.98e-06	90.651	80.889	103.111	-90	0.014																																		81		7.98e-06	124.35	110.793	138.313	103.496	0.014
	43		5.53e-06	107.152	85.987	158.733	86.634	0.01																																		82		7.06e-06	122.636	116.994	130.528	-73.301	0.012
	44		5.53e-06	101.884	83.556	126.912	-86.634	0.009																																		83		6.75e-06	130.355	117.265	137.635	101.31	0.011
	45		7.37e-06	99.786	81.042	124.426	87.51	0.013																																		84		7.37e-06	127.624	117.48	140.203	-75.379	0.013
	46		6.75e-06	94.107	86.012	106.889	-90	0.011																																		85		1.2e-05	112.54	100.778	126.715	105.124	0.021
	47		7.37e-06	87.55	76.068	100.597	90	0.013																																		86		7.67e-06	103.456	99.693	107.812	-80.134	0.013
	48		6.75e-06	91.667	83.337	103.037	-87.138	0.011																																		87		1.26e-05	116.122	106.646	129.437	104.381	0.022
	49		1.11e-05	98.916	85.558	116.842	88.409	0.02																																		88		9.21e-06	130.042	122.696	134.59	-74.055	0.016
	50		7.98e-06	98.38	81.667	129.674	-92.291	0.014																																		89		6.75e-06	125.269	113.044	132.841	101.31	0.011
	51		9.21e-06	88.049	78.429	115.063	90	0.016																																		90		5.22e-06	121.525	113.704	126.741	-75.964	0.009
	52		8.6e-06	86.504	77.675	97.136	-90	0.015																																		91		1.17e-05	113.825	106.37	122.747	104.036	0.021
	53		6.75e-06	84.026	75.815	98.362	90	0.011																																		92		9.21e-06	103.356	101.011	107.11	-75.964	0.016
	54		9.21e-06	94.531	72.612	115.74	-90	0.016																																		93		1.07e-05	97.217	90.667	105.333	103.627	0.019
	55		7.37e-06	99.541	88.556	124.881	90	0.013																																		94		1.07e-05	103.577	94	112.148	-73.142	0.019
	56		6.75e-06	87.573	82.947	94.79	-90	0.011																																		95		1.11e-05	103.281	95.257	113.454	101.634	0.02
	57		9.52e-06	89.326	75.807	104.185	90	0.017																																		96		1.01e-05	107.65	98.701	119.111	-75.53	0.018
	58		8.6e-06	88.694	82.259	96.774	-90	0.015																																		97		9.21e-06	104.703	99.615	107.126	104.036	0.016
	59		1.17e-05	92.328	78.242	115.051	88.493	0.021																																		98		8.9e-06	106.479	103	109.32	-77.471	0.016
	60		5.53e-06	88.706	82.49	101.42	-90	0.01																																		99		1.38e-05	111.077	89.567	124.6	105.593	0.025
	61		1.11e-05	98.04	82.928	135.835	90	0.019																																		100		1.17e-05	109.303	90.222	124.835	-75.964	0.021
	62		9.82e-06	123.767	51.526	215.63	-91.909	0.017																																		101		5.22e-06	114.566	109.889	118.631	104.931	0.009
	63		1.23e-05	134.753	86.197	215.63	90	0.022																																		102	Mean	8.72e-06	114.535	102.325	128.297	15.079	0.015
	64		8.9e-06	112.356	74	149.667	-90	0.016																																		103	SD	2.22e-06	28.012	20.093	38.709	89.757	0.004
	65		7.67e-06	100.093	83.667	124.333	90	0.013																																		104	Min	3.99e-06	80.668	75.683	88.667	-80.134	0.007
	66		7.67e-06	106.04	58.333	136.333	-90	0.013																																		105	Max	1.44e-05	214.722	173.247	253.359	107.103	0.026
	67		1.5e-05	119.342	82.093	166.25	88.807	0.027																																		102		0.000851	114.122	75.447	253.651	103.991	1.536
	68		1.23e-05	118.149	82.26	165.85	-88.493	0.021																																									6.225
	69		7.67e-06	102.903	80.549	112.296	-85.236	0.013
	70		9.82e-06	125.055	86	222.677	88.152	0.017
	71		1.04e-05	110.703	74.139	150.44	-88.264	0.018																																					150.909	327.632	37.2364	80.8421	min
	72		7.06e-06	100.007	81.481	136.263	84.806	0.012																																						565.909		139.636	max
	73		8.9e-06	97.169	90.111	103.889	-90	0.016
	74		9.52e-06	94.065	85.704	106	90	0.017																																		7895 central axis, mid crown
	75		7.98e-06	115.496	87.376	165.778	-90	0.014																																			Label	Area	Mean	Min	Max	Angle	Length
	76		9.21e-06	116.248	79.151	176.245	90	0.016																																		1		8.9e-06	184.548	161.63	201.381	94.086	0.016
	77		1.14e-05	108.475	90.337	162.111	-91.591	0.02																																		2		7.98e-06	188.243	175.703	198.049	-87.709	0.014
	78		8.6e-06	97.581	88.527	112.898	92.121	0.015																																		3		5.53e-06	192.289	169.039	214.63	93.576	0.009
	79		9.52e-06	99.146	87.333	119.363	-90	0.017																																		4		8.9e-06	169.902	150.111	191.444	-85.914	0.016
	80		1.17e-05	101.56	59.033	154.73	90	0.021																																		5		1.04e-05	156.564	145.048	174.273	93.366	0.019
	81		6.75e-06	121.907	66.159	201.778	-90	0.012																																		6		1.04e-05	175.158	155.152	200.151	-88.21	0.018
	82		9.21e-06	122.723	90.271	201.778	88.091	0.016																																		7		1.44e-05	232.296	184.903	253.353	92.49	0.026
	83		9.21e-06	101.979	88.778	133.727	-91.975	0.016																																		8		8.6e-06	242.377	221.333	255	-85.764	0.015
	84		9.52e-06	82.651	74.148	88.778	90	0.017																																		9		9.52e-06	216.082	190.533	247.667	93.814	0.017
	85		7.98e-06	86.175	79.159	94.827	-87.709	0.014																																		10		8.29e-06	169.433	156.239	191	-87.797	0.014
	86		4.91e-06	86.538	77.741	93.356	90	0.008																																		11		9.21e-06	170.014	156.556	185.667	93.814	0.016
	87		7.37e-06	76.633	70.832	81.765	-92.49	0.013																																		12		8.6e-06	187.192	179.844	197.113	-87.797	0.015
	88		8.29e-06	76.317	72.667	85.333	90	0.014																																		13		7.06e-06	194.387	181.576	215.485	95.194	0.012
	89		7.98e-06	75.662	71.607	78.533	-90	0.014																																		14		9.52e-06	211.708	187.222	238.822	-88.091	0.017
	90		8.6e-06	76.509	72.726	83.508	90	0.015																																		15		1.11e-05	198.743	173.914	233.609	94.899	0.019
	91		1.23e-05	74.218	69.244	80.297	-90	0.021																																		16		1.23e-05	193.961	173.856	230.133	-87.064	0.022
	92		6.75e-06	75.514	72.084	79.535	90	0.011																																		17		9.21e-06	210.097	192.333	218.812	93.814	0.016
	93		6.75e-06	75.163	72.012	78.003	-90	0.011																																		18		1.11e-05	179.866	162.878	199.401	-88.363	0.02
	94		5.53e-06	74.611	70.333	79.157	90	0.009																																		19		1.11e-05	177.967	155.893	205.038	93.27	0.02
	95		4.6e-06	69.711	67.333	72.333	-90	0.008																																		20		1.04e-05	168.372	156.413	184.051	-88.264	0.018
	96		6.45e-06	69.801	66.333	73	87.138	0.011																																		21		1.66e-05	173.991	154.445	190.818	94.316	0.03
	97		6.75e-06	64.158	60.448	67.037	-90	0.011																																		22		9.82e-06	161.392	143.122	173.284	-86.309	0.017
	98		5.83e-06	63.128	60.494	65.852	93.18	0.01																																		23		1.5e-05	149.342	130.89	171.31	93.576	0.027
	99	Mean	7.87e-06	103.951	77.314	136.288	-1.97	0.014																																		24		7.67e-06	132.233	124.667	137.074	-90	0.013
	100	SD	2.12e-06	27.236	15.179	51.103	90.071	0.004																																		25		8.9e-06	127.29	121.399	134.833	94.086	0.016
	101	Min	3.99e-06	63.128	25	65.852	-95.711	0.007																																		26		9.52e-06	127.614	122.511	134.748	-86.186	0.017
	102	Max	1.5e-05	218.63	160.667	245	94.764	0.027																																		27		1.01e-05	133.214	125.681	143.704	91.79	0.018
	99	Full length of measured transect	0.000734	104.701	30.492	245.985	89.712	1.324																																		28		6.14e-06	179.823	143.011	224.486	95.711	0.011
		Full length of tooth measured in ct						5.655																																		29		6.75e-06	164.199	149.889	176.497	-90	0.012
									# of von Ebner Lines																																	30		8.6e-06	219.064	174.444	241.87	94.399	0.015
									94.5714	403.929																																31		6.45e-06	177.701	164.4	213.267	-87.138	0.011
				161.571	314.167	37.8286	73.5556	min	49.037	209.444																																32		8.6e-06	164.55	150.965	178.794	92.121	0.015
					565.5		132.4	max	189.143	807.857																																33		5.83e-06	164.264	155.395	182.111	-83.66	0.01
																																										34		8.6e-06	156.027	145.182	166.152	90	0.015
	measured upper crown side a Large Pmx 1 x10 0.25_stitch_part 1																																									35		6.75e-06	157.771	150.889	164.042	-81.87	0.012
		Label	Area	Mean	Min	Max	Angle	Length																																		36		4.3e-06	157.446	151.966	165.459	90	0.007
	1		7.37e-06	178.28	122.619	245.136	-41.424	0.013																																		37		7.98e-06	168.161	157.889	197.395	-87.709	0.014
	2		7.67e-06	213.188	73.735	253.366	139.899	0.014																																		38		7.67e-06	162.963	149.556	177.21	94.764	0.013
	3		1.04e-05	163.76	44.498	234.03	-41.348	0.018																																		39		7.98e-06	152.476	147.684	164.444	-85.426	0.014
	4		8.6e-06	150.687	77	234.918	138.013	0.015																																		40		1.2e-05	155.367	146.845	165.359	91.507	0.021
	5		5.53e-06	171.07	77	248.71	-40.236	0.009																																		41		1.11e-05	165.825	149.238	189.41	-85.101	0.019
	6		8.9e-06	169.845	114.833	245	136.469	0.015																																		42		1.29e-05	184.136	169.195	202.649	92.793	0.023
	7		7.67e-06	153.086	100.312	197.573	-38.29	0.013																																		43		1.23e-05	188.823	176.926	204.603	-85.601	0.022
	8		7.37e-06	164.864	102.667	239.176	136.736	0.013																																		44		9.21e-06	186.497	164.956	212.764	91.975	0.016
	9		7.06e-06	172.92	83.667	244.335	-39.472	0.012																																		45		1.11e-05	194.603	156.512	234.619	-86.73	0.02
	10		5.53e-06	124.8	81.422	147.333	135	0.009																																		46		1.2e-05	161.773	138.637	200.988	93.013	0.021
	11		7.37e-06	127.933	91.989	167.097	-41.424	0.013																																		47		9.21e-06	137.245	126.556	147.889	-86.186	0.016
	12		5.22e-06	123.779	85.826	194.282	142.431	0.009																																		48		1.04e-05	128.7	122.625	142.407	93.468	0.019
	13		6.75e-06	132.899	95.824	150.613	-46.975	0.011																																		49		7.37e-06	137.664	132.259	144.897	-87.51	0.013
	14		8.6e-06	162.292	111.2	228.311	141.009	0.015																																		50		1.17e-05	140.85	135.645	146.414	93.094	0.02
	15		6.75e-06	168.818	143.259	197.93	-39.472	0.012																																		51		6.75e-06	145.281	137.319	163.524	-84.56	0.012
	16		6.75e-06	166.001	110.952	247.079	136.975	0.012																																		52		7.06e-06	153.18	139.155	167.33	95.194	0.012
	17		8.29e-06	196.302	126.298	250.345	-46.548	0.014																																		53		7.37e-06	143.804	141.556	145.903	-85.03	0.013
	18		1.11e-05	183.634	108.149	240.711	140.826	0.019																																		54		5.83e-06	141.113	132.296	147.432	-86.82	0.01
	19		6.75e-06	162.052	128.804	228.603	-41.186	0.012																																		55		8.29e-06	131.835	126.829	144.519	92.203	0.014
	20		8.29e-06	129.544	74	169.217	135	0.015																																		56		4.91e-06	129.931	127.667	133.615	-90	0.008
	21		7.67e-06	117.817	74	163.125	-39.806	0.013																																		57		7.06e-06	128.238	122.101	132.939	95.194	0.012
	22		6.45e-06	127.087	98.778	171.332	139.086	0.011																																		58		1.07e-05	125.006	119.536	134.444	-90	0.019
	23		7.98e-06	102.821	91.873	142.582	-41.82	0.014																																		59	Mean	9.19e-06	167.734	152.759	185.074	3.219	0.016
	24		9.52e-06	101.261	85.667	111.386	136.332	0.017																																		60	SD	2.46e-06	27.81	21.435	34.138	90.947	0.004
	25		9.21e-06	95.416	85.667	103.134	-40.815	0.016																																		61	Min	4.3e-06	125.006	119.536	132.939	-90	0.007
	26		1.29e-05	95.847	87.667	114.759	138.013	0.022																																		62	Max	1.66e-05	242.377	221.333	255	95.711	0.03
	27		1.17e-05	85.086	79.679	93.626	-42.797	0.02																																			Partial length along transect 1						0.933
	28		9.82e-06	78.35	75.393	82.963	138.991	0.017																																			Partial length along transect 1						0.933
	29		1.07e-05	78.973	75.119	82.963	-40.236	0.019
	30	Mean	8.2e-06	141.325	93.376	187.229	45.273	0.014
	31	SD	1.88e-06	36.626	21.14	58.075	91.393	0.003																																					19.4375	46.65	19.4375	46.65	min
	32	Min	5.22e-06	78.35	44.498	82.963	-46.975	0.009																																						77.75		77.75	max
	33	Max	1.29e-05	213.188	143.259	253.366	142.431	0.022																																		1		9.21e-06	116.177	111.103	122.222	95.906	0.016
	30	Full length along first part of transect	0.00023	139.749	44.314	254.806	-41.748	0.415																																		2		8.6e-06	120.455	115.912	125.12	-85.764	0.015
		Full length of tooth measured in ct						5.655																																		3		7.98e-06	117.015	112.142	122.923	97.125	0.014
									# of von Ebner Lines																																	4		6.45e-06	116.58	112.933	120.667	-84.289	0.011
									29.6429	403.929																																5		7.98e-06	116.131	110.922	120.246	94.399	0.014
				110.162	332.647	8.08442	24.4118	min	18.8636	257.045																																6		7.67e-06	116.699	111.855	122.664	-82.875	0.013
					514.091		37.7273	max	46.1111	628.333																																7		9.21e-06	115.413	105.993	123.142	95.906	0.016
	1		6.14e-06	76.076	72.082	82.333	-38.66	0.011																																		8		9.21e-06	117.199	112	122.268	-86.055	0.016
	2		8.9e-06	74.323	71.222	82.333	136.469	0.015																																		9		4.91e-06	111.372	107.821	114.222	97.595	0.009
	3		1.2e-05	70.799	66.887	74.906	-40.764	0.021																																		10		8.29e-06	114.599	111.692	118.598	-83.418	0.015
	4		9.82e-06	74.436	67.111	80.149	137.603	0.017																																		11		7.37e-06	116.163	113.28	121.116	94.764	0.013
	5		8.6e-06	76.621	72.333	80.667	-40.601	0.015																																		12		5.22e-06	113.229	110.389	118.704	-86.424	0.009
	6		7.98e-06	71.17	66.182	78.151	138.366	0.014																																		13		4.3e-06	119.61	115.068	123.679	99.462	0.007
	7		8.29e-06	69.077	66.436	70.462	-41.987	0.015																																		14		6.45e-06	124.152	120.667	127.2	-87.138	0.011
	8		1.01e-05	66.801	62.438	71.547	136.273	0.018																																		15		8.29e-06	122.33	114.513	130.188	96.582	0.015
	9		8.6e-06	66.738	64.111	68.852	-37.304	0.015																																		16		7.67e-06	118.611	114	124.278	-85.236	0.013
	10		8.9e-06	64.677	62.012	68.955	135	0.015																																		17		6.45e-06	124.669	118	134.056	98.531	0.011
	11		1.07e-05	65.118	62.12	69.93	-42.614	0.019																																		18		7.37e-06	125.801	123.395	131.889	-87.51	0.013
	12		9.52e-06	63.914	61.56	66.761	140.44	0.017																																		19		1.01e-05	121.907	115.759	128.222	95.528	0.017
	13		9.82e-06	69.022	63.667	74.466	-43.727	0.017																																		20		4.3e-06	122.776	119.667	124.904	-85.601	0.007
	14		8.9e-06	68.602	64.931	71.968	139.399	0.016																																		21		8.29e-06	120.73	115.316	124.63	94.399	0.014
	15		1.04e-05	68.967	65.384	71.815	-42.614	0.019																																		22		1.14e-05	119.247	111.091	129.889	-83.66	0.02
	16	Mean	9.25e-06	69.756	65.898	74.22	42.352	0.016																																		23		5.83e-06	120.768	115.959	123.477	96.34	0.01
	17	SD	1.36e-06	4.099	3.589	5.258	92.293	0.002																																		24		9.21e-06	123.456	118.969	129.644	-84.094	0.016
	18	Min	6.14e-06	63.914	61.56	66.761	-43.727	0.011																																		25		6.14e-06	120.091	115.856	124.664	93.18	0.01
	19	Max	1.2e-05	76.621	72.333	82.333	140.44	0.021																																		26		6.14e-06	120.18	113.059	124.823	-83.991	0.01
	16	Full length along second part of transect	0.000135	69.496	61.066	81.45	-41.861	0.243																																		27		6.45e-06	120.981	118.704	123.13	95.711	0.011
		Full length of tooth measured in ct						5.655																																		28		6.14e-06	120.269	118.053	122.293	-86.987	0.011
									# of von Ebner Lines																																	29		5.53e-06	114.161	110.422	118.111	96.34	0.01
									15.1875	289.375																																30		9.52e-06	115.944	113.067	119.037	-84.289	0.017
				41.3393	257.222	2.16964	13.5	min	11.5714	220.476																																31		9.82e-06	120.543	113.728	125.159	93.814	0.017
					330.714		17.3571	max	22.0909	420.909																																32		8.6e-06	122.328	119.144	126.953	-85.764	0.015
																																										33		7.67e-06	120.116	114.889	123.667	99.462	0.013
		Mean						0.015																																		34		9.21e-06	124.397	116.809	130.322	-84.094	0.016
		SD						0.0025																																		35		6.45e-06	119.888	116.6	125.889	92.862	0.011
		Min						0.01																																		36		9.82e-06	112.404	107.866	118.333	-86.309	0.017
		Max						0.0215																																		37	Mean	7.59e-06	119.066	114.351	124.065	5.4	0.013
								0.658																																		38	SD	1.74e-06	3.635	3.823	4.293	91.895	0.003
		Full length of tooth measured in ct						5.655																																		39	Min	4.3e-06	111.372	105.993	114.222	-87.51	0.007
									# of von Ebner Lines																																	40	Max	1.14e-05	125.801	123.395	134.056	99.462	0.02
									43.8667	377																																37	Partial length along transect 2	0.000263	119.075	107.815	131.054	-84.642	0.475
				75.4	323.143	8.77333	37.6	min	30.6047	263.023																																37	Partial length along transect 2	0.000263	119.075	107.815	131.054	-84.642	0.475
					452.4		52.64	max	65.8	565.5
																																											Mean						0.0145
	measured central axis Large Pmx 1 x10 0.25_stitch_part 1																																										SD						0.0035
		Label	Area	Mean	Min	Max	Angle	Length																																			Min						0.007
	1		9.52e-06	59.247	55.333	61.133	88.091	0.017																																			Max						0.025
	2		5.22e-06	61.353	58.667	63.667	-90	0.009																																									1.408
	3		6.45e-06	62.429	59	66.333	90	0.011																																									6.225
	4		7.37e-06	62.209	58.928	65.362	-92.49	0.013
	5		6.14e-06	60.983	57.333	65	90	0.011
	6		7.98e-06	61.846	59.667	64	-90	0.014																																					136.599	345.833	30.8966	78.2222	min
	7		8.29e-06	61.55	58.333	64.333	87.797	0.014																																						565.909		128	max
	8		7.37e-06	60.932	57.58	64.565	-85.03	0.013
	9		9.21e-06	60.755	58.276	65.345	88.025	0.016																																		7897 central axis, mid crown
	10		8.6e-06	61.724	57.988	64.444	-92.121	0.015																																			Label	Area	Mean	Min	Max	Angle	Length
	11		7.98e-06	62.316	59.667	64.667	87.709	0.014																																		1		7.06e-06	143.63	136.84	157	103.392	0.012
	12		1.07e-05	67.803	56.765	77.667	-88.315	0.019																																		2		6.14e-06	134.609	122.667	143.895	-78.111	0.011
	13		5.53e-06	78.55	76.902	81.353	86.634	0.009																																		3		7.37e-06	124.845	118.812	130.232	97.431	0.013
	14		7.06e-06	87.275	79.47	94.485	-92.603	0.012																																		4		8.9e-06	118.749	112.286	122.952	-81.87	0.016
	15		7.37e-06	86.694	81.333	95.333	90	0.013																																		5		8.6e-06	126.187	119.667	132.679	98.427	0.015
	16		7.98e-06	88.936	79.667	108.333	-90	0.014																																		6		1.41e-05	114.256	108.108	125	-82.405	0.025
	17		1.17e-05	78.218	69.694	107.712	91.548	0.021																																		7		9.21e-06	117.772	113.556	122.295	97.853	0.016
	18		6.45e-06	72.721	67.333	76.367	-92.862	0.011																																		8		5.83e-06	118.465	112.704	122.481	-77.471	0.01
	19		4.91e-06	74.262	70.333	77.489	86.186	0.008																																		9		1.01e-05	118.559	111.493	125.734	97.352	0.018
	20		9.82e-06	74.271	70.667	81.333	-90	0.017																																		10		6.45e-06	121.737	116.733	129.926	-81.469	0.011
	21		1.07e-05	77.952	73.333	83.333	90	0.019																																		11		4.6e-06	133.103	129.926	141.963	98.13	0.008
	22		1.14e-05	85.307	74.667	96.815	-88.409	0.02																																		12		9.21e-06	158.676	141.963	168.4	-78.311	0.016
	23		7.37e-06	78.319	71.145	82.652	85.03	0.013																																		13		1.35e-05	187.675	158.075	243.615	96.789	0.024
	24		9.82e-06	86.032	73.667	94.839	-91.848	0.017																																		14		7.06e-06	196.124	172.571	217.402	-82.235	0.012
	25		1.17e-05	82.702	73.667	92.667	90	0.02																																		15		1.2e-05	221.895	171.016	254.67	99.211	0.021
	26		9.52e-06	87.957	74	106.333	-90	0.017																																		16		1.14e-05	170.709	139.111	192	99.462	0.02
	27		1.35e-05	90.894	71.667	124.333	90	0.024																																		17		1.26e-05	177.964	162	192.667	-81.469	0.022
	28		1.26e-05	85.715	72.667	107.667	-90	0.022																																		18		6.75e-06	151.854	143.185	176.667	98.13	0.012
	29		1.07e-05	94.501	83	110.206	88.315	0.019																																		19		1.04e-05	146.831	139.925	163.052	-81.384	0.018
	30		1.32e-05	91.047	80	102.667	-90	0.023																																		20		7.98e-06	147.686	139.218	158.547	99.462	0.014
	31		7.98e-06	86.435	78.52	93.187	87.709	0.014																																		21		7.67e-06	154.692	140	167.333	-82.875	0.013
	32		1.11e-05	78.63	74.667	82.333	-90	0.019																																		22		1.2e-05	173.09	147.509	234.281	100.437	0.021
	33		1.2e-05	79.778	74.667	85.333	90	0.021																																		23		8.29e-06	192.496	165.148	235.744	-83.418	0.015
	34		1.38e-05	92.089	79.667	108.333	-90	0.024																																		24		1.14e-05	190.193	160.682	232.704	99.728	0.02
	35		7.67e-06	91.36	84	99	90	0.013																																		25		7.67e-06	171.294	153.333	201.778	-82.875	0.013
	36		7.67e-06	95.414	88	106.5	-94.764	0.013																																		26		8.29e-06	148.399	132.556	154.581	98.746	0.015
	37		8.9e-06	83.563	78	88	90	0.016																																		27		5.22e-06	132.939	128.111	136	-79.38	0.009
	38		9.52e-06	83.015	78	102.467	-86.186	0.017																																		28		1.01e-05	136.465	126.802	144.97	97.352	0.018
	39		1.04e-05	86.434	81	89.727	88.264	0.018																																		29		9.52e-06	147.681	135.901	158.281	-82.405	0.016
	40		8.9e-06	82.948	78.714	86.357	-94.086	0.016																																		30		5.22e-06	170.873	158.037	192.565	97.125	0.009
	41		9.52e-06	83.863	73.6	93.378	91.909	0.017																																		31		7.06e-06	178.66	169.593	186.815	-76.608	0.012
	42		5.83e-06	82.754	77	90.556	-96.34	0.01																																		32	Mean	8.76e-06	152.52	138.307	169.878	11.83	0.015
	43		7.06e-06	84.681	82.333	88	90	0.012																																		33	SD	2.51e-06	28.184	19.58	40.563	91.21	0.005
	44		6.75e-06	86.294	82.921	94.333	-87.274	0.012																																		34	Min	4.6e-06	114.256	108.108	122.295	-83.418	0.008
	45		6.14e-06	95.811	84.158	112.702	86.987	0.011																																		35	Max	1.41e-05	221.895	172.571	254.67	103.392	0.025
	46		1.01e-05	88.667	81.333	111	-90	0.018																																		32	Partial length along transect 1	0.000263	154.993	109.091	254.647	-81.386	0.473
	47		1.01e-05	90.444	82.667	100.667	90	0.018																																		32	Partial length along transect 1	0.000263	154.993	109.091	254.647	-81.386	0.473
	48		7.37e-06	94.083	89	104	-90	0.013
	49		6.14e-06	96.892	87.649	108.526	93.013	0.011
	50		8.29e-06	93.77	84.846	108.308	-92.203	0.014																																					15.7667	23.65	15.7667	23.65	min
	51		7.06e-06	96.681	89.667	102.667	90	0.012																																						47.3		47.3	max
	52		6.14e-06	94.667	91	97.667	-90	0.011																																		1		8.6e-06	120.425	109.704	137.871	100.491	0.015
	53		9.82e-06	102.333	95	118	90	0.017																																		2		7.06e-06	117.944	112	122.975	-84.56	0.012
	54		7.67e-06	103.782	91.333	111.444	-92.386	0.013																																		3		9.52e-06	113.632	108.711	122.296	99.462	0.017
	55		5.22e-06	93.902	87.667	100.333	90	0.009																																		4		9.82e-06	118.907	111.778	125.688	-79.046	0.017
	56		8.29e-06	93.383	87.333	97.333	-90	0.014																																		5		1.26e-05	109.204	105.904	112.357	98.746	0.022
	57		6.14e-06	90.9	88.333	94	90	0.011																																		6		1.01e-05	115.212	108.611	121.972	-82.875	0.018
	58		7.67e-06	93.293	83	102	-90	0.013																																		7		1.2e-05	117.666	105.93	128.591	98.973	0.021
	59		1.26e-05	106.525	100.533	115.35	87.138	0.022																																		8		1.26e-05	101.172	93.367	109.556	-81.469	0.022
	60		8.29e-06	122.128	105.333	147.077	-92.203	0.014																																		9		9.52e-06	102.32	92.467	109.556	99.462	0.017
	61		8.9e-06	118.917	100	140.607	92.045	0.016																																		10		1.14e-05	111.962	100.778	124	-83.66	0.02
	62		8.29e-06	125.24	93.872	166.59	-87.797	0.014																																		11		7.06e-06	107.247	102.131	111.818	100.305	0.012
	63		4.6e-06	121.541	109.833	131	85.914	0.008																																		12		1.07e-05	113.616	104.778	123.781	-79.992	0.019
	64		7.98e-06	139.886	124.067	159.253	-87.709	0.014																																		13		7.98e-06	110.068	106.472	113.406	97.125	0.014
	65		1.23e-05	159.647	120.667	240.308	87.064	0.022																																		14		1.78e-05	101.687	94.064	112.312	-81.027	0.032
	66		1.38e-05	157.204	119.485	233.97	-91.302	0.024																																		15		7.06e-06	105.144	101.933	109.852	100.784	0.012
	67		5.83e-06	142.388	112.222	180.944	86.82	0.01																																		16		1.29e-05	104.709	99.211	110.461	-81.674	0.023
	68		8.9e-06	181.565	139.083	230.5	-87.955	0.016																																		17		8.29e-06	105.454	98.427	109.819	100.886	0.014
	69		1.17e-05	181.935	109	242.541	88.452	0.021																																		18		1.41e-05	106.358	100.778	111.623	-80.961	0.025
	70		1.2e-05	175.453	120.667	237	-90	0.021																																		19		7.37e-06	107.976	102.6	111.789	97.431	0.013
	71		1.29e-05	161.373	118.171	223.846	88.603	0.023																																		20		1.44e-05	110.424	105.615	114.32	-79.919	0.026
	72		9.21e-06	191.062	120.678	240.46	-88.025	0.016																																		21		1.23e-05	110.009	104.829	113.672	98.973	0.022
	73		1.2e-05	168.949	122.667	229.333	90	0.021																																		22		7.06e-06	110.433	105.596	114.586	-79.695	0.012
	74		8.29e-06	180.703	144.333	226.628	-92.203	0.014																																		23		9.52e-06	109.903	105.593	113.16	99.462	0.017
	75		7.37e-06	164.889	131	231.333	90	0.013																																		24		1.04e-05	112.899	108.359	120.667	-79.38	0.018
	76		1.2e-05	155.039	117.123	208.211	-86.987	0.021																																		25		1.07e-05	112.843	106.333	120.754	100.305	0.019
	77		6.45e-06	132.873	111.167	151.2	84.289	0.011																																		26		1.47e-05	114.563	101.498	126.43	-81.347	0.026
	78		1.04e-05	136.185	121.808	158.111	-91.736	0.018																																		27		7.06e-06	111.401	104.741	120.091	100.305	0.012
	79		7.98e-06	141.518	130.667	165.867	87.709	0.014																																		28		9.21e-06	106.861	102.681	117.407	-79.875	0.016
	80		8.9e-06	126.924	120.524	138.667	-92.045	0.016																																		29		8.29e-06	114.645	111.12	117.422	100.886	0.014
	81		1.17e-05	134.716	119.468	169.279	93.094	0.021																																		30		8.29e-06	113.188	107.795	116.026	96.582	0.014
	82		1.32e-05	141.969	116.667	203	-90	0.023																																		31		1.26e-05	113.012	108.022	115.978	-81.469	0.022
	83		9.52e-06	145.25	101.633	210.333	88.091	0.017																																		32		9.52e-06	110.457	104.04	117.067	97.595	0.016
	84		8.9e-06	144.048	101.833	218.238	-85.914	0.016																																		33		9.82e-06	107.262	104.146	113.097	-82.405	0.017
	85		9.52e-06	193.484	141.333	236.333	90	0.017																																		34		1.01e-05	107.027	102.333	111.778	100.62	0.018
	86	Mean	8.97e-06	103.786	88.808	123.795	0.419	0.016																																		35		5.83e-06	111.65	106.111	116.58	99.462	0.01
	87	SD	2.32e-06	35.869	22.755	55.009	90.174	0.004																																		36		1.07e-05	108.623	97.457	116.296	-81.634	0.019
	88	Min	4.6e-06	59.247	55.333	61.133	-96.34	0.008																																		37		8.29e-06	115.861	108.726	121.282	98.746	0.015
	89	Max	1.38e-05	193.484	144.333	242.541	93.094	0.024																																		38		9.52e-06	107.299	101.637	111.729	-78.311	0.017
	86	full length along tansect	0.000738	107.867	55.889	242.514	89.452	1.332																																		39		1.23e-05	112.706	106.074	118.333	98.746	0.022
		Full length of tooth measured in ct						5.655																																		40		8.6e-06	108.329	104.3	112.556	-83.418	0.015
									# of von Ebner Lines																																	41		5.83e-06	110.948	107.444	113.009	99.462	0.01
									83.25	353.438																																42		8.9e-06	110.138	104.127	114.148	-79.509	0.015
				117.812	282.75	27.75	66.6	min	55.5	235.625																																43		7.98e-06	111.634	109.173	116.63	99.09	0.014
					471.25		111	max	166.5	706.875																																44		1.07e-05	122.347	116.63	129.542	-81.634	0.019
																																										45		7.67e-06	121.893	110.667	133.444	99.462	0.013
	7905 perpendicular to root sides, upper root side a																																									46		8.6e-06	119.621	110.082	127.778	-81.254	0.015
		Label	Area	Mean	Min	Max	Angle	Length																																		47		1.17e-05	117.786	113.252	124.12	100.713	0.021
	1		8.6e-06	133.944	94.444	163.351	141.009	0.015																																		48		7.98e-06	121.4	110.222	127.417	-83.157	0.014
	2		1.17e-05	130.502	99.717	185.37	-43.919	0.021																																		49		8.29e-06	117.859	108.889	122.431	99.09	0.014
	3		5.22e-06	168.561	155.234	185.37	135	0.009																																		50		6.75e-06	120.828	115.778	124.069	-81.87	0.012
	4		5.53e-06	153.515	129.741	173.471	132.709	0.009																																		51		1.47e-05	114.424	107.579	124.222	98.471	0.026
	5		5.53e-06	119.633	107.333	131.331	-45	0.01																																		52	Mean	9.9e-06	111.941	105.5	118.348	14.343	0.017
	6		4.91e-06	103.944	92.078	116.212	137.726	0.008																																		53	SD	2.56e-06	5.332	5.125	6.736	91.039	0.005
	7		5.53e-06	112.06	96.795	145.778	-42.709	0.01																																		54	Min	5.83e-06	101.172	92.467	109.556	-84.56	0.01
	8		7.98e-06	168.294	146.628	193.814	133.363	0.014																																		55	Max	1.78e-05	122.347	116.63	137.871	100.886	0.032
	9		5.83e-06	156.444	128.594	180	-38.157	0.01																																		52	Partial length along transect 2	0.000491	111.743	92.495	139.298	98.561	0.885
	10		7.06e-06	165.113	153.189	184.778	133.152	0.012																																		52	Partial length along transect 2	0.000491	111.743	92.495	139.298	98.561	0.885
	11		8.29e-06	167.962	141.293	183.477	-40.101	0.014
	12		4.6e-06	168.616	154.757	184.111	135	0.008																																			Mean						0.016
	13		7.37e-06	154.685	135.87	170.338	-43.264	0.013																																			SD						0.005
	14		4.6e-06	166.064	161.841	170.222	137.726	0.008																																			Min						0.009
	15		7.06e-06	174.613	162.414	187	-39.472	0.012																																			Max						0.0285
	16		5.83e-06	165.496	144.534	220.296	141.843	0.01																																									1.358
	17		7.37e-06	174.322	149.904	220.296	-55.62	0.012																																									6.225
	18		6.14e-06	172.494	154.339	186.497	139.399	0.01
	19		5.22e-06	164.453	152.667	183.167	-39.806	0.009
	20		3.68e-06	160.851	154.948	174	135	0.006																																					176.847	296.429	38.5795	64.6667	min
	21		3.68e-06	161.981	159.192	165.697	-45	0.006																																						565.909		123.455	max
	22		7.67e-06	168.523	158.422	185.416	136.736	0.013
	23		1.2e-05	193.793	154.813	227.67	-45	0.021																																		7908 central axis, mid crown
	24		1.14e-05	183.248	150.418	232.262	135	0.02																																			Label	Area	Mean	Min	Max	Angle	Length
	25		1.14e-05	163.241	133.287	184.329	-42.709	0.02																																		1		1.23e-05	121.142	111.191	132.993	14.744	0.022
	26		7.37e-06	177.82	145.046	203.166	142.125	0.013																																		2		9.21e-06	131.398	116.001	160.92	-165.964	0.016
	27		7.37e-06	215.176	191.222	243.351	-46.736	0.013																																		3		6.75e-06	138.558	118.333	156.494	14.036	0.012
	28		6.14e-06	197.219	163.667	232.259	137.121	0.01																																		4		6.75e-06	123.223	109.166	139.178	-163.301	0.011
	29		7.06e-06	170.913	160.538	185.894	-39.472	0.012																																		5		9.21e-06	113.226	108.437	122.952	12.095	0.016
	30		5.83e-06	168.543	153.926	181.691	132.709	0.01																																		6		9.82e-06	132.338	113.556	149.127	-165.069	0.017
	31		6.14e-06	169.242	153.926	178.628	-36.254	0.01																																		7		8.9e-06	131.488	114.159	179.333	14.036	0.016
	32		3.99e-06	160.512	154.469	168.889	131.634	0.007																																		8		1.44e-05	153.624	119.424	198.052	-165.964	0.025
	33		4.91e-06	164.938	159.309	172.862	-47.726	0.008																																		9		8.9e-06	137.778	112.912	190.667	16.504	0.015
	34		6.14e-06	152.888	142.776	176.296	137.121	0.01																																		10		8.9e-06	154.256	131.909	190.667	-165.466	0.016
	35		5.22e-06	150.707	131.943	221.768	-50.194	0.009																																		11		9.21e-06	141.163	120.5	155.718	14.036	0.016
	36		4.3e-06	137.687	133.367	144.888	141.34	0.007																																		12		1.23e-05	119.085	83.915	164.103	-166.675	0.022
	37		7.67e-06	144.962	135.185	152.778	-43.264	0.013																																		13		5.53e-06	103.66	86.222	111.778	17.354	0.009
	38		3.38e-06	168.527	152.222	188.667	143.13	0.006																																		14		8.6e-06	128.637	101.509	163.437	15.068	0.015
	39		3.68e-06	170.993	158.452	194.778	-30.964	0.006																																		15		8.29e-06	133.381	103.407	168.729	-166.504	0.014
	40		5.53e-06	183.185	162.486	215.963	135	0.009																																		16		7.06e-06	119.359	115.195	126.075	12.804	0.012
	41		7.67e-06	163.49	136.889	230.13	-43.264	0.013																																		17		8.6e-06	114.492	84.534	156.284	-164.932	0.015
	42		5.53e-06	165.323	142.702	195	135	0.009																																		18		6.45e-06	98.059	90.254	107.111	14.744	0.011
	43		7.98e-06	171.245	160.722	181.074	-45	0.014																																		19		7.37e-06	109.946	98	119.392	12.265	0.013
	44		5.53e-06	155.198	144.804	181.074	139.764	0.009																																		20		8.9e-06	88.592	85.265	98	-165.466	0.016
	45		5.53e-06	156.809	139.889	168.222	-49.764	0.01																																		21		1.11e-05	77.934	71.594	89.686	14.826	0.019
	46		8.6e-06	156.022	139.889	170.037	138.013	0.015																																		22		6.45e-06	83.491	71.778	89.689	-160.71	0.011
	47		1.29e-05	158.691	139.217	171.45	-42.089	0.023																																		23		9.82e-06	82.125	67.06	105.279	11.31	0.017
	48		5.22e-06	138.77	124.208	146.222	137.726	0.009																																		24		1.38e-05	73.916	62.296	85.293	-164.407	0.025
	49		1.07e-05	155.621	135	174.049	-46.169	0.019																																		25		7.37e-06	71.243	62.296	80.278	14.621	0.013
	50		4.91e-06	159.82	147.889	176.302	140.711	0.008																																		26		1.54e-05	66.787	55.004	76.048	-164.539	0.027
	51		7.06e-06	167.01	154.694	194.111	-45	0.012																																		27		8.9e-06	62.029	54.411	71.556	14.534	0.016
	52		5.83e-06	143.369	118.925	199.759	141.843	0.01																																		28		1.2e-05	71.749	65.093	79.673	-164.876	0.021
	53		5.22e-06	126.647	119.733	154.222	-42.51	0.009																																		29		1.17e-05	81.707	65.912	109.986	14.036	0.021
	54		7.37e-06	149.128	126.188	183.109	133.264	0.013																																		30		1.26e-05	76.943	63	85.34	-167.005	0.022
	55		5.53e-06	138.749	116.444	165.621	-40.236	0.01																																		31		1.04e-05	72.483	60.995	82.823	16.189	0.018
	56	Mean	6.63e-06	159.846	142.149	183.391	48.559	0.011																																		32		1.07e-05	82.728	70.778	99.649	-166.373	0.019
	57	SD	2.22e-06	19.615	19.59	25.441	91.137	0.004																																		33		9.82e-06	78.834	70.62	85.611	14.931	0.017
	58	Min	3.38e-06	103.944	92.078	116.212	-55.62	0.006																																		34		1.69e-05	79.324	67.786	87.407	-164.932	0.03
	59	Max	1.29e-05	215.176	191.222	243.351	143.13	0.023																																		35		9.52e-06	81.347	72.401	86.444	13.57	0.017
	56	Full length of measurement along transect	0.00035	156.752	99.064	245.355	-43.294	0.632																																		36		1.17e-05	73.066	64.003	86.444	-165.964	0.021
		Full length of tooth measured in ct						5.655																																		37		1.04e-05	76.401	58.404	93.286	14.036	0.018
									# of von Ebner Lines																																	38		1.29e-05	80.311	64.778	100.388	-165.964	0.023
									57.4545	514.091																																39		1.5e-05	76.434	68.111	89	15.461	0.027
				293.766	377	32.8312	42.1333	min	27.4783	245.87																																40		1.2e-05	67.051	58.667	76.701	-167.8	0.021
					807.857		90.2857	max	105.333	942.5																																41		1.01e-05	59.511	53.259	66.815	14.931	0.018
																																										42		1.11e-05	59.105	47.111	74.934	-163.61	0.02
																																										43		8.29e-06	59.311	52.107	64.791	16.26	0.014
																																										44		1.17e-05	62.475	51.431	74.102	-165.964	0.02
																																										45		1.04e-05	57.519	53.455	63.335	15.709	0.018
																																										46		1.14e-05	57.089	51.716	62.214	-165.579	0.02
																																										47		1.07e-05	60.239	50.545	66.62	15.255	0.019
																																										48		6.14e-06	70.38	57.558	82	-168.111	0.011
																																										49		1.29e-05	77.75	63.918	85.333	14.381	0.022
																																										50	Mean	1.02e-05	93.32	79.591	110.035	-69.948	0.018
																																										51	SD	2.55e-06	29.196	24.653	39.003	90.759	0.005
																																										52	Min	5.53e-06	57.089	47.111	62.214	-168.111	0.009
																																										53	Max	1.69e-05	154.256	131.909	198.052	17.354	0.03
																																										50		0.000483	91.159	47.068	219.104	14.354	0.872
																																																	6.225


																																													133.013	270.652	18.6325	37.913	min
																																														478.846		67.0769	max
																																										7910 crown base
																																											Label	Area	Mean	Min	Max	Angle	Length
																																										1		8.6e-06	120.592	109.568	134.593	-160.201	0.015
																																										2		7.06e-06	123.591	109	137.375	13.392	0.012
																																										3		8.9e-06	118.848	103.239	135.449	-161.565	0.016
																																										4		1.54e-05	104.367	85.333	115.051	19.179	0.027
																																										5		1.78e-05	101.615	85.333	126.107	-162.525	0.031
																																										6		4.6e-06	98.435	88.862	111.667	21.038	0.008
																																										7		1.11e-05	101.213	93.573	111.685	-165.174	0.019
																																										8		1.01e-05	101.685	93.667	112.38	18.435	0.018
																																										9		8.6e-06	84.178	73.609	93.667	-162.897	0.015
																																										10		7.37e-06	87.022	78	95.133	19.983	0.013
																																										11		1.29e-05	89.335	79.292	100.667	-161.565	0.023
																																										12		1.01e-05	87.263	71.333	101.932	18.435	0.018
																																										13		6.75e-06	88.626	71.333	105.667	-160.71	0.012
																																										14		1.07e-05	97.978	89.414	105.667	15.255	0.019
																																										15		7.67e-06	95.804	87.444	105	-165.379	0.013
																																										16		8.9e-06	116.313	96	145.388	22.932	0.016
																																										17		8.6e-06	108.017	85	126.333	-162.897	0.015
																																										18		7.67e-06	122.9	84.069	153	16.928	0.013
																																										19		7.67e-06	145.187	126	155.741	-160.821	0.013
																																										20		4.3e-06	137.858	125.692	145.74	18.435	0.007
																																										21		7.06e-06	151.045	133.596	172.793	-161.565	0.012
																																										22		9.52e-06	122.771	102.28	142.667	15.422	0.017
																																										23		7.98e-06	138.907	114.667	168.933	-161.565	0.014
																																										24		7.37e-06	131.728	121	139.223	15.255	0.013
																																										25		8.6e-06	120.718	105.333	137.103	-160.201	0.015
																																										26		7.06e-06	133.689	105.333	148.088	18.435	0.012
																																										27		8.9e-06	109.622	90.281	140.333	-163.496	0.016
																																										28		9.21e-06	122.155	102.679	150.089	17.819	0.016
																																										29		8.29e-06	133.884	126.647	147.46	-162.255	0.015
																																										30		1.11e-05	130.415	115.204	143.325	16.39	0.02
																																										31		1.04e-05	105.617	93.347	118	-162.121	0.018
																																										32		1.87e-05	115.836	103.1	137.187	16.336	0.033
																																										33		1.54e-05	119.737	99.333	129.136	-160.821	0.027
																																										34		1.04e-05	99.559	85.08	110.095	17.879	0.018
																																										35		7.98e-06	122.268	102	139.959	-165.964	0.014
																																										36		1.07e-05	146.576	117.66	165.676	18.97	0.019
																																										37		2e-05	140.042	125.986	155.01	-163.56	0.035
																																										38	Mean	9.82e-06	115.551	99.44	131.441	-74.723	0.017
																																										39	SD	3.56e-06	18.558	16.93	21.399	91.326	0.006
																																										40	Min	4.3e-06	84.178	71.333	93.667	-165.964	0.007
																																										41	Max	2e-05	151.045	133.596	172.793	22.932	0.035
																																										38	Full length of measured transect	0.000352	115.609	70.66	174.318	-162.276	0.635
																																											Full length of toot from ct						6.225


																																													199.733	270.652	20.3743	27.6087	min
																																														565.909		57.7273	max
																																										7935 central axis, mid crown
																																											Label	Area	Mean	Min	Max	Angle	Length
																																										1		7.06e-06	148.649	143.773	152	-87.397	0.012
																																										2		7.37e-06	150.18	146.739	153	97.431	0.013
																																										3		8.6e-06	148.571	143.704	152.556	-83.66	0.015
																																										4		6.75e-06	148.475	145.19	152.667	92.726	0.012
																																										5		1.26e-05	153.528	149	156.292	-82.875	0.022
																																										6		8.9e-06	149.118	146	155	98.13	0.016
																																										7		2.12e-05	151.061	147.657	157.02	-84.958	0.038
																																										8		9.52e-06	148.939	145.111	154.222	99.462	0.017
																																										9		1.17e-05	145.99	142.541	149.658	-85.365	0.021
																																										10		1.04e-05	145.182	142.212	149.374	96.911	0.018
																																										11		8.29e-06	145.741	142.295	149.513	-83.418	0.015
																																										12		2.82e-05	139.913	135.144	145.667	96.34	0.05
																																										13		9.21e-06	134.734	128.609	139.69	-84.094	0.016
																																										14		1.11e-05	135.884	126.19	141.857	98.13	0.02
																																										15		1.07e-05	135.294	130.324	141	-84.958	0.019
																																										16		1.47e-05	132.868	128.943	137.582	97.275	0.026
																																										17		1.6e-05	134.841	127.627	138.928	-85.515	0.028
																																										18		1.93e-05	134.74	127.129	141.559	95.528	0.035
																																										19		8.29e-06	134.79	132.577	137.333	-83.418	0.015
																																										20		1.41e-05	132.462	128.667	136.889	96.34	0.025
																																										21		1.63e-05	130.984	123.481	140.141	-84.508	0.029
																																										22		1.54e-05	136.442	126.524	143.571	98.13	0.027
																																										23	Mean	1.25e-05	141.745	136.793	146.614	6.193	0.022
																																										24	SD	5.32e-06	7.467	8.753	6.895	92.901	0.01
																																										25	Min	6.75e-06	130.984	123.481	136.889	-87.397	0.012
																																										26	Max	2.82e-05	153.528	149	157.02	99.462	0.05
																																										23		0.000271	140.868	124.365	157.187	96.254	0.488
																																																	6.225


																																													235.795	194.531	18.4848	15.25	min
																																														518.75		40.6667	max
																																										7947 upper mid root
																																											Label	Area	Mean	Min	Max	Angle	Length
																																										1		3.26e-05	90.578	79.884	95.833	-165.069	0.023
																																										2		2.3e-05	91.573	89	93.455	21.801	0.015
																																										3		3.84e-05	90.33	83.946	99.771	-165.256	0.026
																																										4		2.3e-05	99.253	94.222	101.795	16.699	0.015
																																										5		2.49e-05	99.498	91.278	116.778	-161.565	0.017
																																										6		1.92e-05	182.656	111.111	239.148	20.556	0.012
																																										7		2.69e-05	101.63	94	111.111	-165.964	0.018
																																										8		1.92e-05	96.881	94	98.864	20.556	0.012
																																										9		3.26e-05	93.353	81.444	101.029	-162.646	0.022
																																										10		2.11e-05	80.758	78.333	83.222	18.435	0.014
																																										11		1.73e-05	83.248	82.472	84.667	-165.964	0.012
																																										12		1.92e-05	76.278	69.353	84.667	20.556	0.012
																																										13		1.92e-05	74.377	69.667	80.889	-161.565	0.013
																																										14		2.3e-05	86.696	80.889	90.518	15.255	0.015
																																										15		1.92e-05	95.386	86.333	104.63	-167.471	0.013
																																										16		1.34e-05	152.144	89.593	191.222	18.435	0.009
																																										17		1.73e-05	171.296	115.222	210	-159.444	0.012
																																										18		1.92e-05	182.59	167.263	199.086	18.435	0.013
																																										19		1.34e-05	203.799	162.889	236	-168.69	0.008
																																										20		1.73e-05	115.884	95.778	162.889	20.556	0.011
																																										21		2.69e-05	84.36	80.59	95.778	-165.964	0.018
																																										22		1.92e-05	96.03	84.444	101.56	18.435	0.013
																																										23		2.3e-05	134.14	100.407	191.667	-163.301	0.015
																																										24		2.3e-05	149.555	132.444	191.667	19.983	0.015
																																										25		1.34e-05	137.034	117.111	155.778	-161.565	0.009
																																										26		2.11e-05	137.166	119.051	156.903	18.435	0.014
																																										27		1.92e-05	116.351	103.778	128.704	-167.471	0.013
																																										28		2.49e-05	104.451	88.383	122.111	18.435	0.017
																																										29		1.92e-05	118.229	106.296	124.591	-161.565	0.013
																																										30		2.11e-05	110.748	103.431	117.399	18.435	0.013
																																										31		1.73e-05	106.055	97.306	115.111	-165.964	0.012
																																										32		2.3e-05	119.109	93.667	134.114	21.801	0.015
																																										33	Mean	2.16e-05	115.045	98.237	131.905	-72.583	0.014
																																										34	SD	5.51e-06	33.787	22.671	46.824	93.254	0.004
																																										35	Min	1.34e-05	74.377	69.353	80.889	-168.69	0.008
																																										36	Max	3.84e-05	203.799	167.263	239.148	21.801	0.026
																																										33		0.000633	111.071	69.225	239.372	17.499	0.456
																																																	6.225


																																													177.857	345.833	13.0286	25.3333	min
																																														622.5		45.6	max
[truncated: 84 more columns]

## Sheet: Teeth comparison corr crowns
					tooth age/days
					measurement 1								measurement 2								measurement 3								measurement 4								measurement 5								measurement 6
# of transects		tooth length/mm	central axis height/mm	average incremental line width	mean	min	max	SD±	Age according to tooth length (from mean incremental line width)	Age according to central axis height in slice (from specific incremental line width)	SD±	Age according to central axis height (from mean incremental line width)	mean	min	max	SD±	Age according to tooth length (from mean incremental line width)	Age according to central axis height in slice (from specific incremental line width)	SD±	Age according to central axis height (from mean incremental line width)	mean	min	max	SD±	Age according to tooth length (from mean incremental line width)	Age according to central axis height in slice (from specific incremental line width)	SD±	Age according to central axis height (from mean incremental line width)	mean	min	max	SD±	Age according to tooth length (from mean incremental line width)	Age according to central axis height in slice (from specific incremental line width)	SD±	Age according to central axis height (from mean incremental line width)	mean	min	max	SD±	Age according to tooth length (from mean incremental line width)	Age according to central axis height in slice (from specific incremental line width)	SD±	Age according to central axis height (from mean incremental line width)	mean	min	max	SD±	Age according to tooth length (from mean incremental line width)
6	Pmx 1	27.255	5.655	0.0138333	97.4615	46.9259	211.167	43.3162	2096.54	435	193.333	435	82.7857	41.3929	128.778	33.1143	1946.79	403.929	161.571	403.929	94.5714	49.037	189.143	37.8286	1946.79	403.929	161.571	403.929	43.8667	30.6047	65.8	8.77333	1817	377	75.4	377	83.25	55.5	166.5	27.75	1703.44	353.438	117.812	353.438	57.4545	27.4783	105.333	32.8312	2477.73
3	Pmx 3	39.015	11.455	0.011	57.4545	27.4783	105.333	32.8312	3546.82	1041.36	595.065	1041.36	62.7	36.8824	104.5	15.675	3901.5	1145.5	286.375	1145.5	58.5	31.9091	87.75	19.5	3251.25	954.583	318.194	954.583
3	Mx 6	31.685	8.825	0.0116667	33.5294	25.3333	45.6	7.18487	1863.82	519.118	111.239	519.118	30.6667	21.2308	55.2	8.7619	3520.56	980.556	280.159	980.556	38.8889	23.3333	70	19.4444	3520.56	980.556	490.278	980.556
1	Mx 6 replacement	7.465	2.055	0.01	22.1	15.7857	36.8333	5.525	746.5	205.5	51.375	205.5
9	Mx 7	28.485	6.225	0.0179444	28.5	18.6122	43.4286	12.9545	1780.31	383.125	174.148	389.062	58.7143	42.5172	91.3333	13.8151	533.214	444.643	104.622	444.643	102.4	59.0769	219.429	37.2364	1899	415	150.909	415	97.1034	56.32	201.143	30.8966	1964.48	429.31	136.599	429.31	84.875	47.6491	150.889	38.5795	1780.31	389.062	176.847	389.062	48.4444	29.0667	96.8889	18.6325	1582.5
3	Mx 7 replacement	3.005	1.785	0.02	22.9091	15.2727	42	8.59091	136.591	81.1364	30.4261	81.1364	32.4762	19.4857	68.2	12.9905	143.095	85	34	85	31.8824	19.3571	60.2222	13.2843	176.765	105	43.75	105
2	Mx 12	31.695	7.765	0.034	10.0132	5.07333	20.5676	9.01184	417.039	102.171	91.9539	102.171	23.2647	12.9672	39.55	12.6898	932.206	228.382	124.572	228.382
4	Mx 13	26.395	6.415	0.01875	89.2273	42.6739	178.455	33.4602	1256.9	305.476	187.985	305.476	94.1111	48.4	282.333	36.1966	1466.39	356.389	137.073	356.389	62.1304	37.6053	102.071	17.2585	1147.61	278.913	77.4758	278.913	105.154	54.68	341.75	31.5462	2030.38	493.462	148.038	493.462
3	Dent 2	32.575	4.625	0.022	36.5238	23.2424	54.7857	8.59384	1551.19	220.238	51.8207	220.238	29.9524	18.5	52.4167	9.36012	1551.19	220.238	68.8244	220.238	26.5417	16.7632	49	8.84722	1357.29	192.708	64.2361	192.708
3	Dent 2 replacement	1.935	1.175	0.013	54.7692	35.6	89	16.4308	148.846	90.3846	27.1154	90.3846	58.1429	35.3913	116.286	23.2571	138.214	83.9286	33.5714	83.9286	64.3333	33.5652	154.4	32.1667	161.25	97.9167	48.9583	97.9167
7	Dent 4	43.715	12.865	0.0161429	35.6667	23.7778	61.1429	11.8889	3642.92	1072.08	357.361	1072.08	25.5833	14.619	51.1667	8.52778	3642.92	1072.08	357.361	1072.08	22	15.0526	40.8571	9.77778	3362.69	989.615	439.829	989.615	29.1538	22.2941	42.1111	5.3007	3362.69	989.615	179.93	989.615	23.9091	15.4706	43.8333	11.1576	1987.05	584.773	272.894	584.773	57.4783	32.2439	94.4286	15.9662	1900.65
4	Dent 4 replacement	28.655	4.565	0.01875	45.8235	27.8214	86.5556	14.0995	1685.59	268.529	82.6244	268.529	45.8947	29.0667	87.2	16.391	1508.16	240.263	85.8083	240.263	37.9474	25.75	60.0833	10.1193	1508.16	240.263	64.0702	240.263	24.8	19.0769	35.4286	4.37647	1432.75	228.25	40.2794	228.25
23	Dent 11	25.985	5.025	0.0169391	27.7436	18.9825	49.1818	9.56676	1332.56	257.692	88.8594	257.692	38.2105	19.6216	103.714	22.2895	1367.63	264.474	154.276	264.474	29.1429	21.7021	39.2308	6.02956	1484.86	287.143	59.4089	287.143	39.1765	22.2	95.1429	16.3235	1528.53	295.588	123.162	295.588	83.8125	44.7	134.1	27.9375	1624.06	314.062	104.688	314.062	82.875	49.1111	147.333	19.125	1624.06
2	Dent 12	36.585	9.475	0.0171667	40.2692	29.9143	51.0732	16.3254	2110.67	546.635	221.609	546.635	43.4706	18.9487	73.9	23.7112	2152.06	557.353	304.011	557.353
2	Dent 15	28.035	6.975	0.0165	34.6	24.1395	69.2	12.5818	1869	465	169.091	465	25.8333	16.6071	46.5	9.9359	1557.5	387.5	149.038	387.5
1	Dent 15 replacement	8.865	3.475	0.026	17.0385	9.42553	31.6429	7.57265	340.962	133.654	59.4017	133.654
2	Dent 16	26.125	5.265	0.0235	34.1111	20.0217	76.75	14.3626	967.593	195	82.1053	195	42.55	27.4516	70.9167	14.1833	1306.25	263.25	87.75	263.25
78			average:	0.0180702
	Base to apex				SD±	(Full length/Mean incremental line width)+-(Full length/(Mean incremental line width+-SD))
	Near crown apex
	Mid crown
	At base of crown
	Root base
	Mid root
	Root apex
	Based on partal or estimated full length
[truncated: 158 more columns]
