# Supplementary material for: Sampling impacts the assessment of tooth growth and replacement rates in archosaurs: implications for paleontological studies
Source: PeerJ journal article supplement (doi:10.7717/peerj.9918), 2020-09-18
Supplement: Supplemental_table_S1.pdf [file Supplemental_table_S1.pdf]

| crown height [mm]                 | 0.1928   | 0.2028   | 0.9228   | 1.1750   | 1.2328   | 1.5628   | 1.6228   | 1.6428   | 1.7850   | 1.7928   | 1.8628   | 2.0528   | 2.0550   | 2.0628   | 2.1328   | 2.1928   | 3.4750   | 4.5650   | 5.0250   | 5.2650   | 5.6550    | 6.2250    | 6.4150   | 8.8250   | 12.8650  | Mean     | Variance  | t-statistic | p-value |
|-----------------------------------|----------|----------|----------|----------|----------|----------|----------|----------|----------|----------|----------|----------|----------|----------|----------|----------|----------|----------|----------|----------|-----------|-----------|----------|----------|----------|----------|-----------|-------------|---------|
| TFT by sampled CA sections [days] | 16.0667  | 17.6348  | 70.9846  | 90.3846  | 70.4457  | 130.2333 | 121.7100 | 131.4240 | 89.2500  | 96.9081  | 128.4690 | 175.9543 | 205.5000 | 134.5304 | 148.1111 | 173.1158 | 133.6538 | 249.0000 | 301.5000 | 195.0000 | 396.8421  | 364.0351  | 342.1333 | 519.1176 | 559.3478 | 194.4541 | 20739.047 |             |         |
| VEIW of the tooth [mm]            | 0.0120   | 0.0115   | 0.0130   | 0.0130   | 0.0175   | 0.0120   | 0.0133   | 0.0125   | 0.0200   | 0.0185   | 0.0145   | 0.0117   | 0.0100   | 0.0153   | 0.0144   | 0.0127   | 0.0260   | 0.0183   | 0.0167   | 0.0270   | 0.0143    | 0.0171    | 0.0188   | 0.0170   | 0.0230   |          |           |             |         |
| Tooth specific SD [mm]            | 0.003    | 0.0025   | 0.0030   | 0.0037   | 0.0048   | 0.0030   | 0.0030   | 0.0028   | 0.0054   | 0.004    | 0.0030   | 0.0030   | 0.0020   | 0.0030   | 0.0037   | 0.0030   | 0.0080   | 0.0043   | 0.0035   | 0.0065   | 0.0080    | 0.0110    | 0.0053   | 0.0030   | 0.0050   |          |           |             |         |
| TFT (tooth specific SD) + [days]  | 21.4222  | 22.5333  | 92.2800  | 126.3441 | 97.0709  | 173.6444 | 157.0452 | 169.3608 | 122.2603 | 123.6414 | 161.9826 | 236.8615 | 256.8750 | 167.2541 | 199.3271 | 226.8414 | 193.0556 | 325.9938 | 381.6456 | 256.8293 | 904.8000  | 1020.4918 | 476.9517 | 630.3571 | 714.7222 | 290.3837 | 69121.160 | 1.6001      | 0.0590  |
| TFT (tooth specific SD) - [days]  | 12.8533  | 14.4857  | 57.6750  | 70.3593  | 55.2825  | 104.1867 | 99.3551  | 107.3725 | 70.2756  | 79.6800  | 106.4457 | 139.9636 | 171.2500 | 112.5164 | 117.8343 | 139.9660 | 102.2059 | 201.4267 | 249.1736 | 157.1642 | 254.1573  | 221.5302  | 266.7360 | 441.2500 | 459.4643 | 152.5044 | 12859.536 | -1.1443     | 0.1293  |
| SD + [days]                       | 5.3556   | 4.8986   | 21.2954  | 35.9595  | 26.6252  | 43.4111  | 35.3352  | 37.9368  | 33.0103  | 26.7333  | 33.5136  | 60.9073  | 51.3750  | 32.7236  | 51.2160  | 53.7256  | 59.4017  | 76.9938  | 80.1456  | 61.8293  | 507.9579  | 656.4567  | 134.8183 | 111.2395 | 155.3744 |          |           |             |         |
| SD - [days]                       | -3.2133  | -3.1491  | -13.3096 | -20.0253 | -15.1632 | -26.0467 | -22.3549 | -24.0515 | -18.9744 | -17.2281 | -22.0233 | -35.9906 | -34.2500 | -22.0141 | -30.2769 | -33.1498 | -31.4480 | -47.5733 | -52.3264 | -37.8358 | -142.6848 | -142.5048 | -75.3974 | -77.8676 | -99.8835 |          |           |             |         |
| SD + [%]                          | 33.3333  | 27.7778  | 30.0000  | 39.7849  | 37.7953  | 33.3333  | 29.0323  | 28.8660  | 36.9863  | 27.5862  | 26.0870  | 34.6154  | 25.0000  | 24.3243  | 34.5794  | 31.0345  | 44.4444  | 30.9212  | 26.5823  | 31.7073  | 128.0000  | 180.3279  | 39.4052  | 21.4286  | 27.7778  |          |           |             |         |
| SD - [%]                          | -20.0000 | -17.8571 | -18.7500 | -22.1557 | -21.5247 | -20.0000 | -18.3673 | -18.3007 | -21.2598 | -17.7778 | -17.1429 | -20.4545 | -16.6667 | -16.3636 | -20.4420 | -19.1489 | -23.5294 | -19.1058 | -17.3554 | -19.4030 | -35.9551  | -39.1459  | -22.0374 | -15.0000 | -17.8571 |          |           |             |         |

**TFTs based on mean VEIW [tooth] plus/minus 1 SD [tooth]**

TFTs based on mean VEIW for the sampled tooth positions sorted by ascending central axis height. The light blue rows TFT +/- SD show the TFT based on the VEIW of the respective tooth plus or minus the standard deviation of all VEIW with a transect orientation along the CA in that particular tooth. These SDs are presented in the row tooth specific SD for each tooth. The next two rows are showing just the differences between TFTs based on mean VEIW [tooth] minus 1 SD [tooth] (TFT+ SD, as it produces bigger TFTs) or TFT and the calculated TFT in days based on men VEIW [tooth] plus 1 SD [tooth] (TFT- SD as it produces smaller TFTs) and the two rows below them are showing the same differences in percent (see below). The last four columns show the mean TFT, the variance, t-test statistic and the p-value for a one sided two sample t-test comparing the upper and lower TFT ranges based on the mean SD of tooth VEIW. Both are not significantly different from the TFT based on sampling.

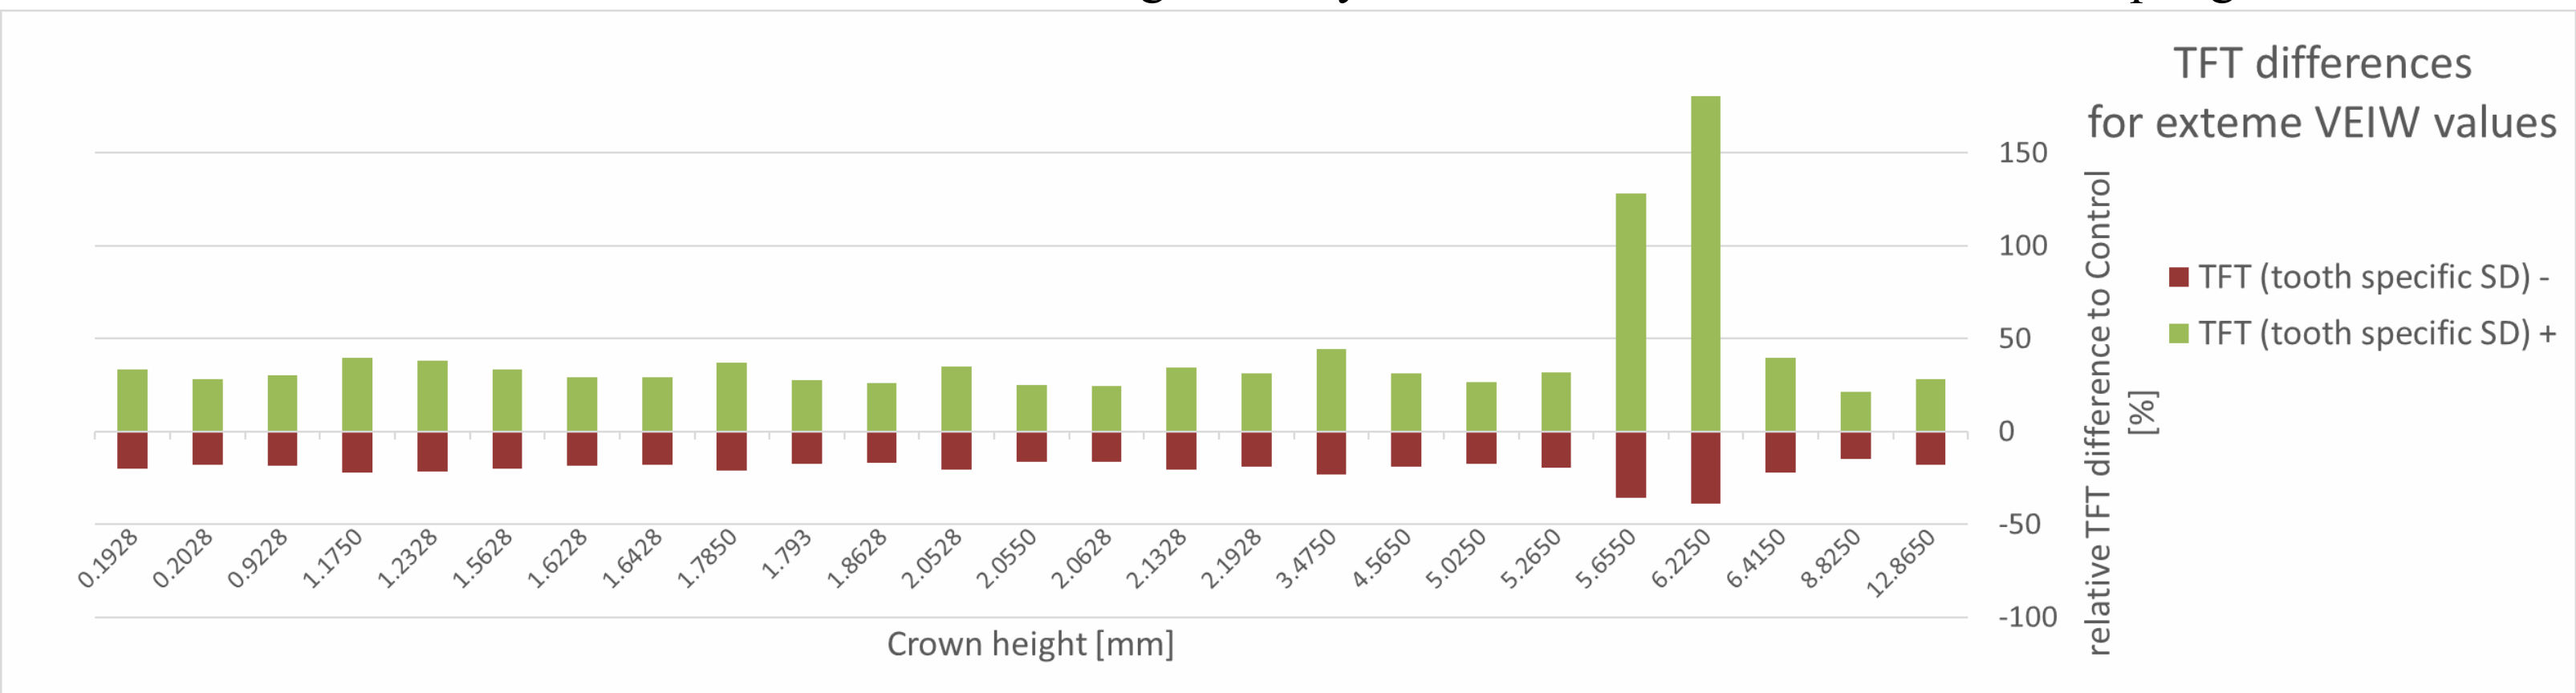

**TFT differences for extreme VEIW values using tooth specific SDs**

For each tooth (on the x-axis with their crown height) the deviation of the upper and lower TFT estimate (upper estimate: based on mean VEIW [tooth] minus 1 SD [tooth]; lower estimate based on mean VEIW [tooth] plus 1 SD [tooth]) to the calculated TFTs [based on mean VEIW [tooth]] is shown in percent (see last two rows of table 4). Lower TFT estimates are in red-brown, upper TFT estimates in green.
